# Supplementary material for: Mechanism and origins of gold-catalyzed domino cyclization to spiroindolines: the role of periplanar cooperation and hydrogen bonding interactions
Source: Royal Society of Chemistry journal article supplement (doi:10.1039/d0qo00359j), 2020-01-01
Supplement: d0qo00359j1.pdf [file d0qo00359j1.pdf]

# Mechanism and origins of gold-catalyzed domino cyclization to spiroindolines: the role of periplanar cooperation and hydrogen bonding interactions

*Yunhe Li, Xiang Zhao*

*Institute for Chemical Physics & Department of Chemistry, School of Science, State Key Laboratory of Electrical Insulation and Power Equipment & MOE Key Laboratory for Nonequilibrium Synthesis and Modulation of Condensed Matter, Xi'an Jiaotong University, Xi'an710049, China*

## Table of contents

|                                                                                                                                                                                       |            |
|---------------------------------------------------------------------------------------------------------------------------------------------------------------------------------------|------------|
| <b>1. Optimized intermediates and transition structures in Fig. 1a in Fig. S1.....</b>                                                                                                | <b>S2</b>  |
| <b>2. DFT-computed free energy profiles for [Au(P(CH<sub>3</sub>)<sub>3</sub>)<sub>3</sub>]<sup>-</sup>-catalyzed preferred pathway in THF and CH<sub>3</sub>CN in Figure S2.....</b> | <b>S4</b>  |
| <b>3. Optimized intermediates and transition structures in Figure 7 in Figure S1.....</b>                                                                                             | <b>S5</b>  |
| <b>4. NCI analysis of rate-determining transition states.....</b>                                                                                                                     | <b>S5</b>  |
| <b>5. Thermodynamic properties of the structures in Table S1 .....</b>                                                                                                                | <b>S6</b>  |
| <b>6. Thermodynamic properties of the structures in Table S2.....</b>                                                                                                                 | <b>S7</b>  |
| <b>7. Thermodynamic properties of the structures in Table S3 .....</b>                                                                                                                | <b>S8</b>  |
| <b>8. Thermodynamic properties of the structures in Table S4.....</b>                                                                                                                 | <b>S9</b>  |
| <b>9. Thermodynamic properties of the structures in Table S5.....</b>                                                                                                                 | <b>S9</b>  |
| <b>10. Full citation of Ref. 18 .....</b>                                                                                                                                             | <b>S10</b> |
| <b>11. Cartesian coordinates of the stationary points discussed in the text.....</b>                                                                                                  | <b>S11</b> |

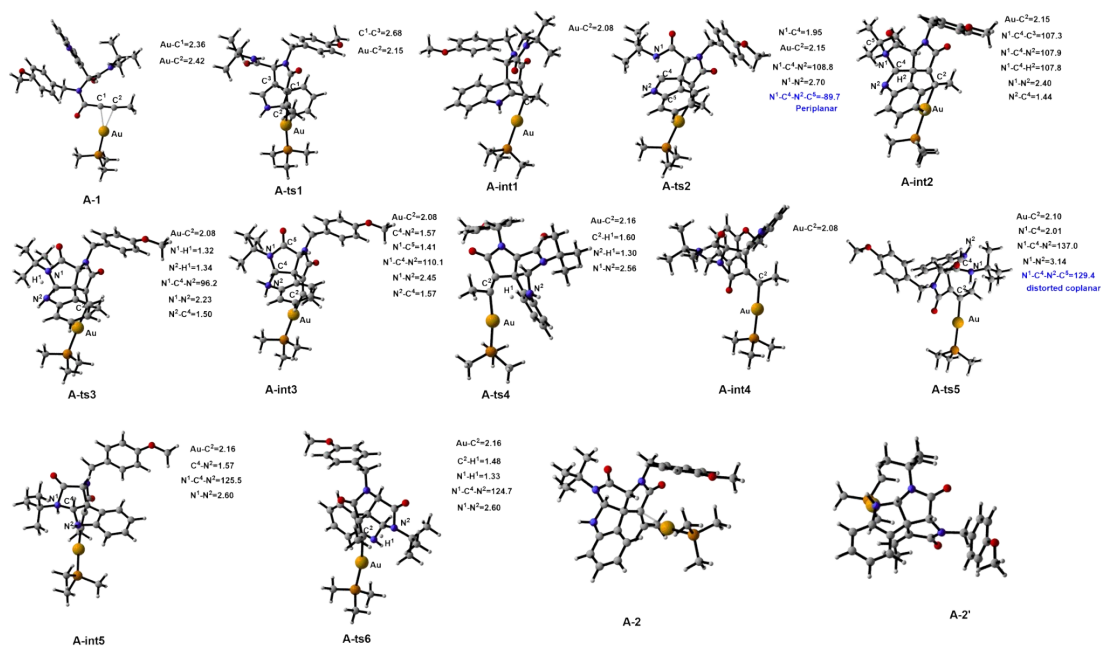

**Fig. S1** optimized intermediates and transition structures in Fig. 1a. The selected bond distances are in Å.

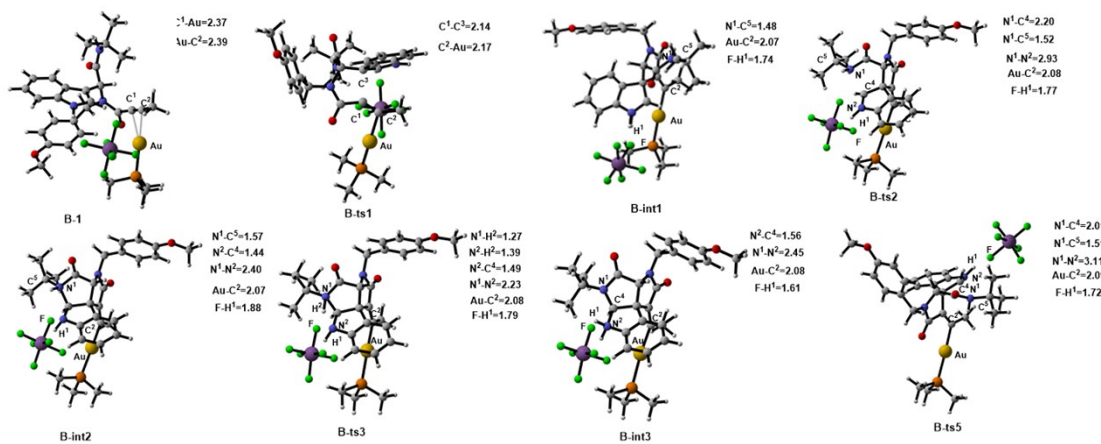

**Fig. S2** optimized intermediates and transition structures in Fig. 1b. The selected bond distances are in Å.

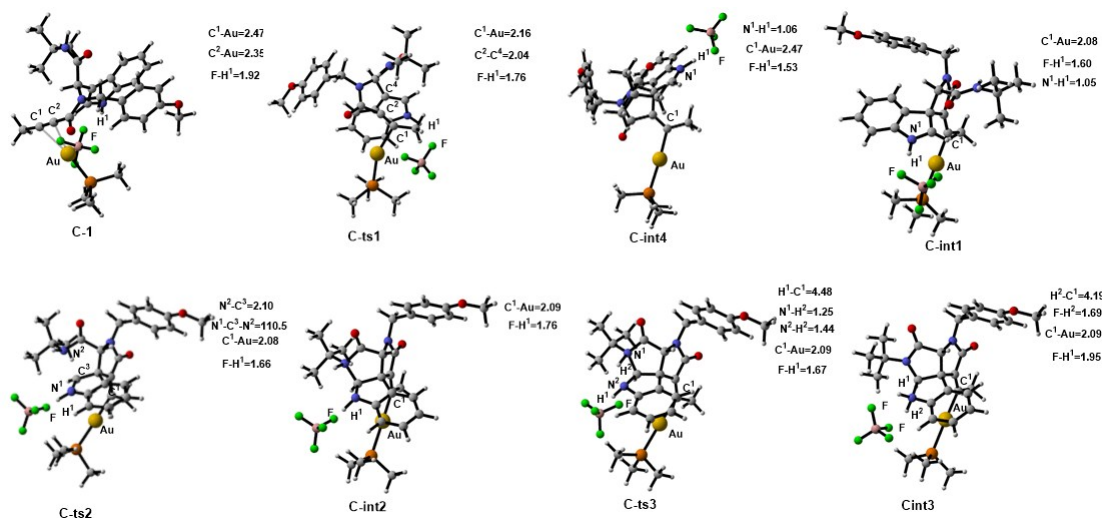

**Fig. S3** optimized intermediates and transition structures in Fig. 1b. The selected bond distances are in Å.

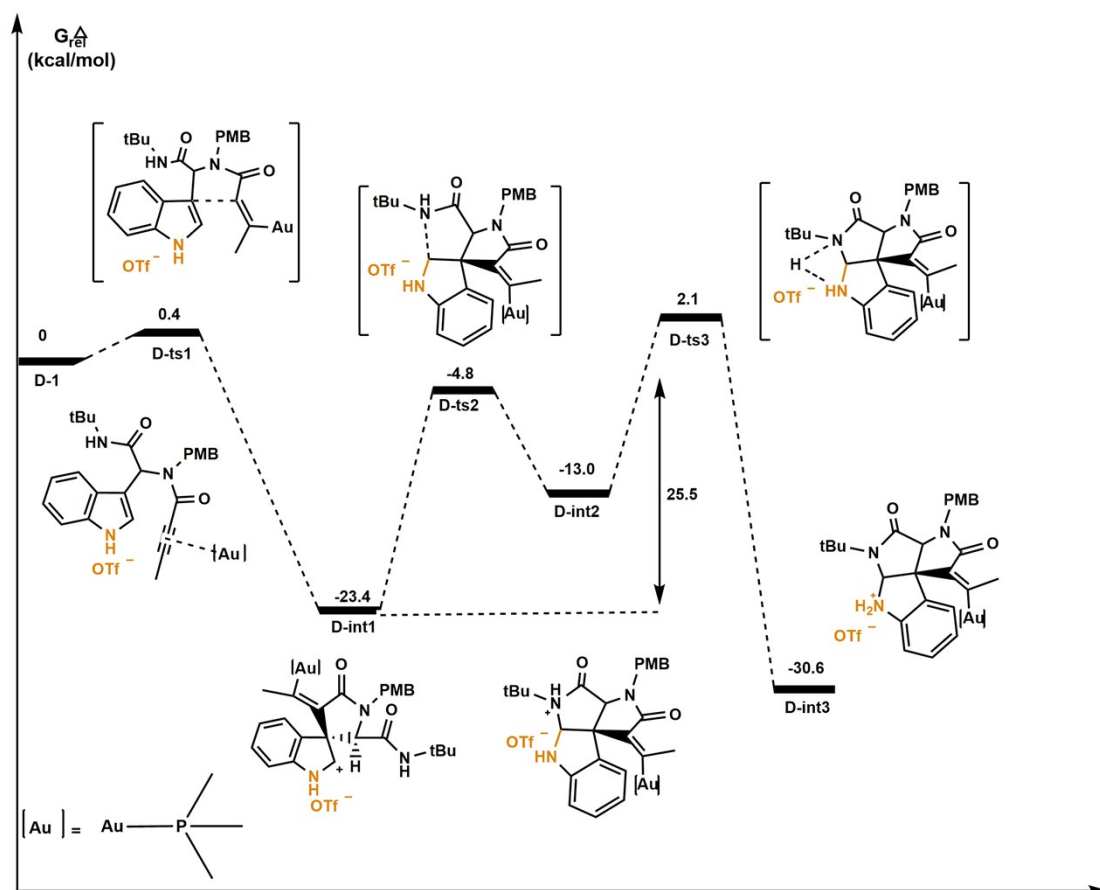

**Fig. S4.** Energy profiles for catalyzed by  $[\text{Au}(\text{PMe}_3)\text{OTf}]$ .

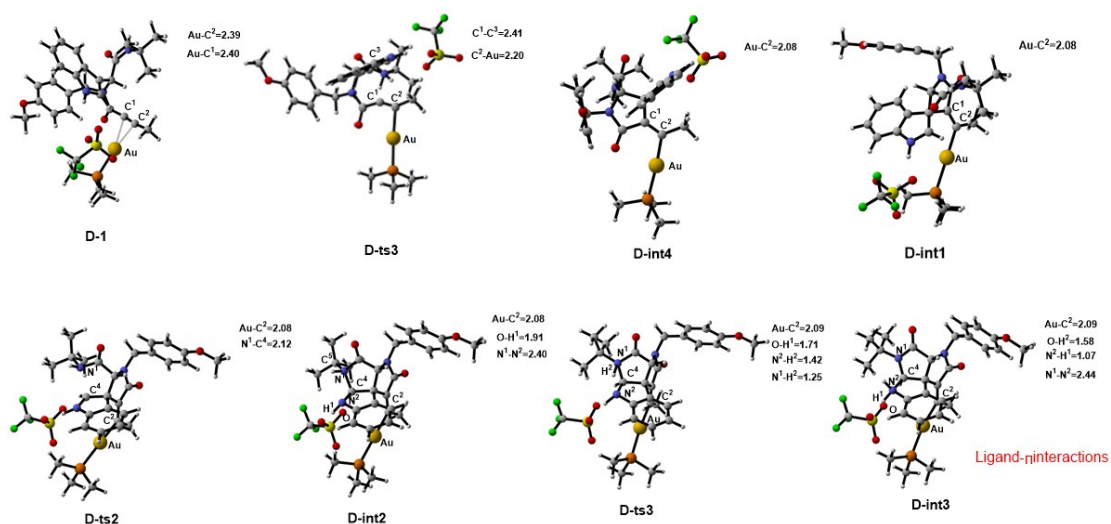

**Fig. S5** optimized intermediates and transition structures in Fig. S4. The selected bond distances are in Å.

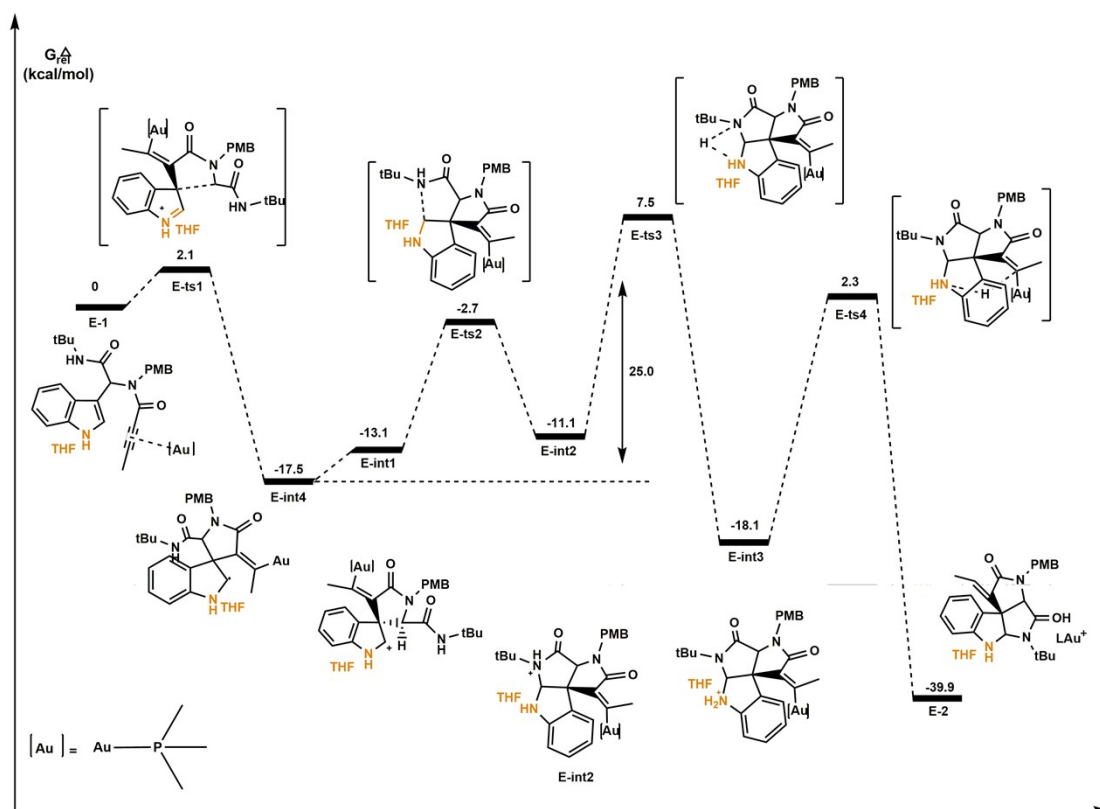

**Fig. S6.** DFT-computed free energy profiles for [Au(P(CH<sub>3</sub>)<sub>3</sub>)<sup>+</sup>]-catalyzed preferred pathway in THF solvent. Energy values are in kcal/mol.

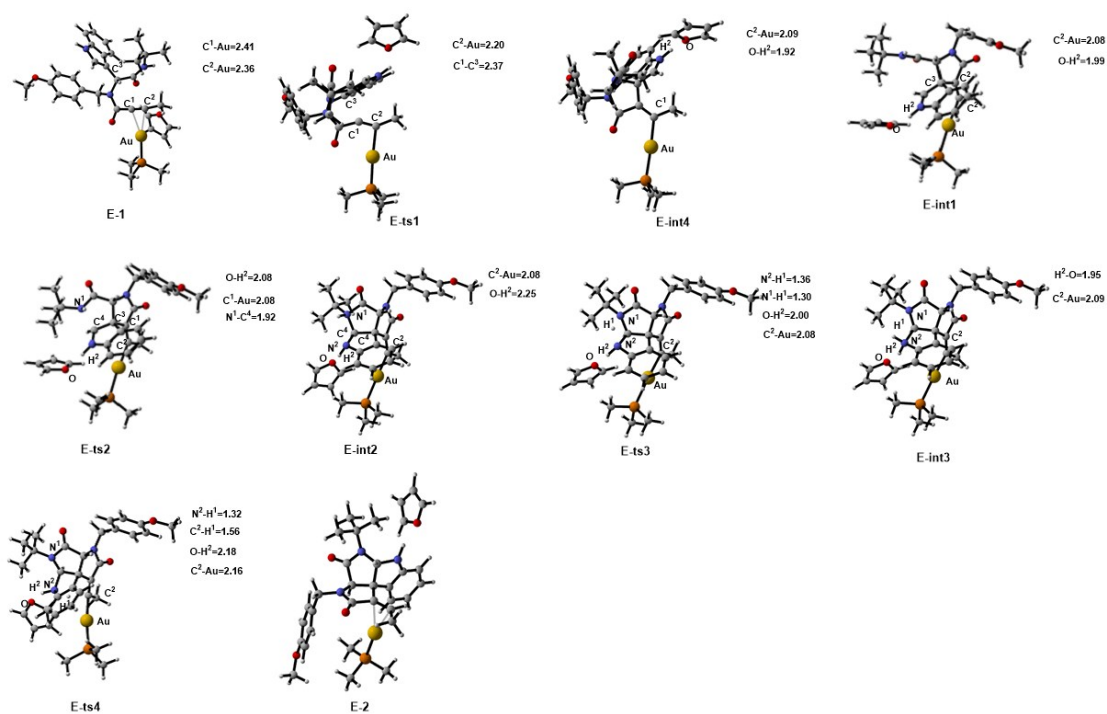

**Fig. S7** optimized intermediates and transition structures in Fig. S6. The selected bond distances are in Å.

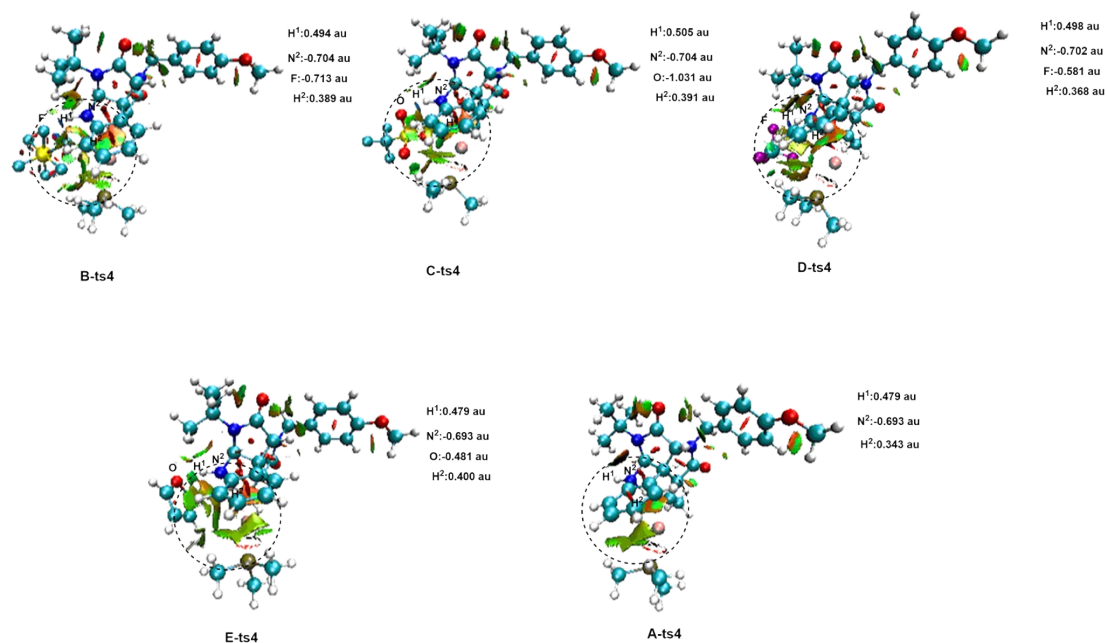

**Figure S4.** Noncovalent interaction (NCI) plot for the rate-determining transition states. The green, blue and red regions respectively represent attractive, strongly and repulsive interactions

**Table S1.** Thermodynamic properties (relative free energies and activation free energies in gas phase and in solution) of the structures in Figure 1

| <b>System</b> | $\Delta E_{\text{gas}}^{\text{rel}}$ | $\Delta G_{\text{gas}}^{\text{rel}}$ | $\Delta E_{\text{gas}}^{\ddagger}$ | $\Delta G_{\text{gas}}^{\ddagger}$ | $\Delta E_{\text{sol}}^{\text{rel}}$ | $\Delta G_{\text{sol}}^{\text{rel}}$ | $\Delta E_{\text{sol}}^{\ddagger}$ | $\Delta G_{\text{sol}}^{\ddagger}$ |
|---------------|--------------------------------------|--------------------------------------|------------------------------------|------------------------------------|--------------------------------------|--------------------------------------|------------------------------------|------------------------------------|
| <b>A-1</b>    | 0                                    | 0                                    |                                    |                                    | 0                                    | 0                                    |                                    |                                    |
| <b>A-ts1</b>  | 9.6                                  | 11.1                                 | 9.6                                | 11.1                               | 16.0                                 | 10.2                                 | 16.0                               | 10.2                               |
| <b>A-int1</b> | -19.4                                | -16.9                                |                                    |                                    | -13.1                                | -15.6                                |                                    |                                    |
| <b>A-ts2</b>  | -1.4                                 | -0.1                                 | 18.0                               | 16.7                               | 0.2                                  | -3.2                                 | 13.3                               | 12.4                               |
| <b>A-int2</b> | -10.0                                | -7.7                                 |                                    |                                    | -8.5                                 | -7.9                                 |                                    |                                    |
| <b>A-ts3</b>  | 8.1                                  | 11.5                                 | 18.1                               | 19.2                               | 13.7                                 | 10.5                                 | 22.2                               | 18.4                               |
| <b>A-int3</b> | -14.4                                | -12.1                                |                                    |                                    | -19.3                                | -18.3                                |                                    |                                    |
| <b>A-ts4</b>  | 1.7                                  | 5.0                                  | 16.1                               | 17.1                               | 6.8                                  | 3.8                                  | 26.1                               | 22.1                               |
| <b>A-2</b>    | -44.0                                | -39.5                                |                                    |                                    | -40.3                                | 40.5                                 |                                    |                                    |
| <b>A-int4</b> | -21.0                                | -19.8                                |                                    |                                    | -13.2                                | -17.1                                |                                    |                                    |
| <b>A-ts5</b>  | 29.8                                 | 31.7                                 | 50.8                               | 51.6                               | 37.9                                 | 33.1                                 | 51.1                               | 50.2                               |
| <b>A-int5</b> | 13.4                                 | 15.8                                 |                                    |                                    | 16.2                                 | 14.9                                 |                                    |                                    |
| <b>A-ts6</b>  | 23.7                                 | 28.0                                 | 10.2                               | 12.2                               | 29.4                                 | 25.3                                 | 13.2                               | 10.4                               |
| <b>A-2'</b>   | -19.1                                | -15.6                                |                                    |                                    | -20.1                                | -21.3                                |                                    |                                    |

**Table S2.** Thermodynamic properties (relative free energies and activation free energies in gas phase and in solution) of the structures in Figure 3

| <b>System</b> | $\Delta E_{\text{gas}}^{\text{rel}}$ | $\Delta G_{\text{gas}}^{\text{rel}}$ | $\Delta E_{\text{gas}}^{\ddagger}$ | $\Delta G_{\text{gas}}^{\ddagger}$ | $\Delta E_{\text{sol}}^{\text{rel}}$ | $\Delta G_{\text{sol}}^{\text{rel}}$ | $\Delta E_{\text{sol}}^{\ddagger}$ | $\Delta G_{\text{sol}}^{\ddagger}$ |
|---------------|--------------------------------------|--------------------------------------|------------------------------------|------------------------------------|--------------------------------------|--------------------------------------|------------------------------------|------------------------------------|
| <b>B-1</b>    | 0                                    | 0                                    |                                    |                                    | 0                                    | 0                                    |                                    |                                    |
| <b>B-ts1</b>  | 0.3                                  | 1.1                                  | 0.3                                | 1.1                                | 5.0                                  | 1.6                                  | 5.0                                | 1.6                                |
| <b>B-int1</b> | -15.2                                | -16.5                                |                                    |                                    | -13.1                                | -17.1                                |                                    |                                    |
| <b>B-ts2</b>  | 0.8                                  | 0.1                                  | 16.0                               | 16.5                               | 6.0                                  | -1.0                                 | 19.1                               | 16.1                               |
| <b>B-int2</b> | -9.3                                 | -8.6                                 |                                    |                                    | -8.7                                 | -10.8                                |                                    |                                    |
| <b>B-ts3</b>  | 5.0                                  | 4.5                                  | 14.3                               | 13.1                               | 12.4                                 | 3.9                                  | 21.1                               | 14.7                               |

|               |       |       |      |      |       |       |      |      |
|---------------|-------|-------|------|------|-------|-------|------|------|
| <b>B-int3</b> | -22.2 | -21.9 |      |      | -24.0 | -25.4 |      |      |
| <b>B-int4</b> | -4.1  | -7.4  |      |      | -8.0  | -12.7 |      |      |
| <b>B-ts5</b>  | 48.7  | 46.1  | 52.8 | 53.5 | 43.5  | 38.7  | 51.5 | 51.4 |

**Table S3.** Thermodynamic properties (relative free energies and activation free energies in gas phase and in solution) of the structures in Fig.S4

| <b>System</b> | $\Delta E^{\text{rel}}_{\text{gas}}$ | $\Delta G^{\text{rel}}_{\text{gas}}$ | $\Delta E^{\ddagger}_{\text{gas}}$ | $\Delta G^{\ddagger}_{\text{gas}}$ | $\Delta E^{\text{rel}}_{\text{sol}}$ | $\Delta G^{\text{rel}}_{\text{sol}}$ | $\Delta E^{\ddagger}_{\text{sol}}$ | $\Delta G^{\ddagger}_{\text{sol}}$ |
|---------------|--------------------------------------|--------------------------------------|------------------------------------|------------------------------------|--------------------------------------|--------------------------------------|------------------------------------|------------------------------------|
| <b>D-1</b>    | 0                                    | 0                                    |                                    |                                    | 0                                    | 0                                    |                                    |                                    |
| <b>D-ts1</b>  | 9.4                                  | 5.8                                  | 9.4                                | 5.8                                | 8.4                                  | 0.4                                  | 8.4                                | 0.4                                |
| <b>D-int4</b> | -12.6                                | -14.7                                |                                    |                                    | -14.2                                | -18.3                                |                                    |                                    |
| <b>D-int1</b> | -21.8                                | -24.6                                |                                    |                                    | -18.4                                | -23.4                                |                                    |                                    |
| <b>D-ts2</b>  | -5.0                                 | -5.9                                 | 16.7                               | 18.7                               | 0                                    | -4.8                                 | 18.4                               | 18.6                               |
| <b>D-int2</b> | -13.4                                | -13.6                                |                                    |                                    | -12.8                                | -13.0                                |                                    |                                    |
| <b>D-ts3</b>  | 0.2                                  | 0.3                                  | 13.6                               | 13.9                               | 7.0                                  | 2.1                                  | 19.7                               | 15.1                               |
| <b>D-int3</b> | -29.9                                | -30.3                                |                                    |                                    | -30.5                                | -30.6                                |                                    |                                    |

**Table S4.** Thermodynamic properties (relative free energies and activation free energies in gas phase and in solution) of the structures in Fig.1c

| <b>System</b> | $\Delta E^{\text{rel}}_{\text{gas}}$ | $\Delta G^{\text{rel}}_{\text{gas}}$ | $\Delta E^{\ddagger}_{\text{gas}}$ | $\Delta G^{\ddagger}_{\text{gas}}$ | $\Delta E^{\text{rel}}_{\text{sol}}$ | $\Delta G^{\text{rel}}_{\text{sol}}$ | $\Delta E^{\ddagger}_{\text{sol}}$ | $\Delta G^{\ddagger}_{\text{sol}}$ |
|---------------|--------------------------------------|--------------------------------------|------------------------------------|------------------------------------|--------------------------------------|--------------------------------------|------------------------------------|------------------------------------|
| <b>C-1</b>    | 0                                    | 0                                    |                                    |                                    | 0                                    | 0                                    |                                    |                                    |
| <b>C-ts1</b>  | 8.5                                  | 9.4                                  | 8.5                                | 9.4                                | 15.0                                 | 9.6                                  | 15.0                               | 9.6                                |
| <b>C-int4</b> | -5.6                                 | -8.6                                 |                                    |                                    | -12.4                                | -15.6                                |                                    |                                    |
| <b>C-int1</b> | -21.5                                | -21.0                                |                                    |                                    | -20.0                                | -20.9                                |                                    |                                    |
| <b>C-ts2</b>  | -2.8                                 | -2.0                                 | 18.7                               | 19.0                               | 1.2                                  | -1.2                                 | 21.2                               | 19.7                               |
| <b>C-int2</b> | -10.8                                | -8.3                                 |                                    |                                    | -11.7                                | -8.8                                 |                                    |                                    |
| <b>C-ts3</b>  | 2.1                                  | 3.7                                  | 12.9                               | 12.0                               | 9.0                                  | 5.0                                  | 20.8                               | 13.8                               |
| <b>C-int3</b> | -31.4                                | -29.1                                |                                    |                                    | -29.1                                | -27.0                                |                                    |                                    |

**Table S5.** Thermodynamic properties (relative free energies and activation free energies in gas phase and in solution) of the structures in Figure 7

| System        | $\Delta E_{\text{gas}}^{\text{rel}}$ | $\Delta G_{\text{gas}}^{\text{rel}}$ | $\Delta E_{\text{gas}}^{\ddagger}$ | $\Delta G_{\text{gas}}^{\ddagger}$ | $\Delta E_{\text{sol}}^{\text{rel}}$ | $\Delta G_{\text{sol}}^{\text{rel}}$ | $\Delta E_{\text{sol}}^{\ddagger}$ | $\Delta G_{\text{sol}}^{\ddagger}$ |
|---------------|--------------------------------------|--------------------------------------|------------------------------------|------------------------------------|--------------------------------------|--------------------------------------|------------------------------------|------------------------------------|
| <b>E-1</b>    | 0                                    | 0                                    |                                    |                                    | 0                                    | 0                                    |                                    |                                    |
| <b>E-ts1</b>  | 3.7                                  | 2.1                                  | 3.7                                | 2.1                                | 10.2                                 | 3.5                                  | 10.2                               | 3.5                                |
| <b>E-int4</b> | -18.9                                | -17.5                                |                                    |                                    | -10.6                                | -12.9                                |                                    |                                    |
| <b>E-int1</b> | -10.8                                | -13.1                                |                                    |                                    | -10.4                                | -17.2                                |                                    |                                    |
| <b>E-ts2</b>  | -1.9                                 | -2.7                                 | 8.9                                | 10.3                               | -1.5                                 | -6.3                                 | 8.9                                | 10.8                               |
| <b>E-int2</b> | -9.6                                 | -11.1                                |                                    |                                    | -8.8                                 | -12.3                                |                                    |                                    |
| <b>E-ts3</b>  | 7.7                                  | 7.5                                  | 17.3                               | 18.6                               | 12.8                                 | 6.5                                  | 21.6                               | 18.8                               |
| <b>E-int3</b> | -16.6                                | -18.1                                |                                    |                                    | -21.5                                | -24.2                                |                                    |                                    |
| <b>E-ts4</b>  | 2.8                                  | 2.3                                  | 19.4                               | 20.3                               | 6.7                                  | -0.3                                 | 28.1                               | 23.8                               |
| <b>E-2</b>    | -39.9                                | -39.4                                |                                    |                                    | -37.9                                | -41.3                                |                                    |                                    |

**Complete list of authors for references with more than 10 authors**

[19] M. J. Frisch, G. W. Trucks, H. B. Schlegel, G. E. Scuseria, M. A. Robb, J. R. Cheeseman, G. Scalmani, V. Barone, B. Mennucci, G. A. Petersson, H. Nakatsuji, M. Caricato, X. Li, H. P. Hratchian, A. F. Izmaylov, J. Bloino, G. Zheng, J. L. Sonnenberg, M. Hada, M. Ehara, K. Toyota, R. Fukuda, J. Hasegawa, M. Ishida, T. Nakajima, Y. Honda, O. Kitao, H. Nakai, T. Vreven, J. A. Montgomery, Jr., J. E. Peralta, F. Ogliaro, M. Bearpark, J. J. Heyd, E. Brothers, K. N. Kudin, V. N. Staroverov, R. Kobayashi, J. Normand, K. Raghavachari, A. Rendell, J. C. Burant, S. S. Iyengar, J. Tomasi, M. Cossi, N. Rega, J. M. Millam, M. Klene, J. E. Knox, J. B. Cross, V. Bakken, C. Adamo, J. Jaramillo, R. Gomperts, R. E. Stratmann, O. Yazyev, A. J. Austin, R. Cammi, C.



Pomelli, J. W. Ochterski, R. L. Martin, K. Morokuma, V. G. Zakrzewski, G. A. Voth, P. Salvador, J. J. Dannenberg, S. Dapprich, A. D. Daniels, Ö. Farkas, J. B. Foresman, J. V. Ortiz, J. Cioslowski, and D. J. Fox, Gaussian 09, Revision A.01; Gaussian, Inc., Wallingford CT, 2016.

**The Cartesian coordinates of the stationary points discussed in the text**

**A-1**

|   |            |            |            |
|---|------------|------------|------------|
| C | 4.1044274  | -1.3754477 | -2.8450986 |
| C | 5.3175124  | -0.9490437 | -2.2756946 |
| C | 5.3706524  | -0.4661417 | -0.9798036 |
| C | 4.1728874  | -0.4133277 | -0.2679476 |
| C | 2.9386924  | -0.8244227 | -0.8222026 |
| C | 2.9174584  | -1.3232447 | -2.1354606 |
| N | 3.9262934  | 0.0321813  | 1.0140924  |
| C | 2.5878864  | -0.0599077 | 1.2735064  |
| C | 1.9392534  | -0.5862417 | 0.1851024  |
| O | -0.4101156 | -1.8279427 | -1.8747086 |
| C | 0.0795264  | -1.9938037 | -0.7661256 |
| C | 0.4613284  | -0.7697667 | 0.0868014  |
| N | 0.2491004  | -3.2503777 | -0.2669876 |
| N | -0.2135446 | 0.4231163  | -0.4652466 |
| C | -1.5459606 | 0.5632803  | -0.3628836 |
| C | -2.2636366 | -0.5068717 | 0.3565704  |
| C | -2.8751696 | -1.4379657 | 0.8779224  |
| C | -3.4043556 | -2.6330677 | 1.5194594  |
| O | -2.2181496 | 1.4907093  | -0.8175266 |
| C | 0.9277594  | -3.8740387 | 0.8976024  |

|   |            |            |            |
|---|------------|------------|------------|
| C | 0.3283654  | -5.2763177 | 0.9909874  |
| C | 2.4319624  | -3.9858707 | 0.6590184  |
| C | 0.6479564  | -3.1382037 | 2.2027394  |
| C | 1.9109754  | 3.9303273  | 0.9459334  |
| C | 3.2125444  | 4.0663993  | 0.4568024  |
| C | 3.6158664  | 3.3155393  | -0.6512466 |
| C | 2.7348364  | 2.4312133  | -1.2499926 |
| C | 1.4347744  | 2.2729593  | -0.7626276 |
| C | 1.0363884  | 3.0415463  | 0.3267544  |
| C | 0.4895564  | 1.3023383  | -1.4148066 |
| O | 4.1491124  | 4.8884813  | 0.9852434  |
| C | 3.7740854  | 5.7104483  | 2.0643114  |
| H | 4.1015104  | -1.7519097 | -3.8649156 |
| H | 6.2299964  | -1.0006217 | -2.8640526 |
| H | 6.3067914  | -0.1353097 | -0.5360516 |
| H | 1.9842754  | -1.6473887 | -2.5933646 |
| H | 4.6102694  | 0.4481323  | 1.6266054  |
| H | 2.1746094  | 0.2850303  | 2.2146994  |
| H | 0.0685214  | -0.9106137 | 1.1022884  |
| H | 0.0116944  | -3.9165337 | -0.9965146 |
| H | -4.1436226 | -3.1264827 | 0.8805804  |
| H | -3.8802116 | -2.3928447 | 2.4755684  |
| H | -2.5854856 | -3.3389507 | 1.7020244  |
| H | -0.7543116 | -5.2359177 | 1.1643804  |
| H | 0.7882064  | -5.8307517 | 1.8156924  |
| H | 0.5087214  | -5.8463267 | 0.0705584  |
| H | 2.9098324  | -3.0014477 | 0.6227124  |

|    |            |            |            |
|----|------------|------------|------------|
| H  | 2.8967544  | -4.5652887 | 1.4660344  |
| H  | 2.6353254  | -4.4979917 | -0.2889306 |
| H  | 0.9804794  | -3.7607017 | 3.0410164  |
| H  | -0.4261356 | -2.9475947 | 2.3344024  |
| H  | 1.1943554  | -2.1922417 | 2.2712894  |
| H  | 1.5696604  | 4.5138143  | 1.7961524  |
| H  | 4.6315774  | 3.4407963  | -1.0184766 |
| H  | 3.0692064  | 1.8364653  | -2.1003286 |
| H  | 0.0209164  | 2.9418333  | 0.7107244  |
| H  | -0.2950116 | 1.8287253  | -1.9677166 |
| H  | 1.0179204  | 0.6610963  | -2.1300406 |
| H  | 4.6517474  | 6.3063383  | 2.3211304  |
| H  | 3.4745824  | 5.1193923  | 2.9421244  |
| H  | 2.9502644  | 6.3853463  | 1.7924944  |
| Au | -4.5183906 | 0.1406013  | 0.0733604  |
| P  | -6.3713896 | 1.3673353  | -0.5971826 |
| C  | -5.7708266 | 2.8436243  | -1.4728356 |
| H  | -5.1573576 | 2.5348643  | -2.3250586 |
| H  | -6.6119516 | 3.4534303  | -1.8222866 |
| H  | -5.1396926 | 3.4335933  | -0.8010186 |
| C  | -7.4341786 | 1.9747753  | 0.7476094  |
| H  | -8.2344226 | 2.6014433  | 0.3370294  |
| H  | -7.8752756 | 1.1306013  | 1.2854194  |
| H  | -6.8374066 | 2.5639993  | 1.4500554  |
| C  | -7.4773846 | 0.5102993  | -1.7586396 |
| H  | -8.2765086 | 1.1874363  | -2.0820286 |
| H  | -6.9070106 | 0.1803263  | -2.6319646 |

|               |            |            |            |
|---------------|------------|------------|------------|
| H             | -7.9189166 | -0.3669197 | -1.2770326 |
| <b>A- ts1</b> |            |            |            |
| C             | -0.4967368 | -3.3976869 | -0.5292464 |
| C             | -1.6914418 | -3.4581219 | -1.2649094 |
| C             | -2.2406438 | -2.3200439 | -1.8386264 |
| C             | -1.5620928 | -1.1160949 | -1.6490624 |
| C             | -0.3474988 | -1.0411719 | -0.9341724 |
| C             | 0.1854832  | -2.2034299 | -0.3631304 |
| N             | -1.8619758 | 0.1661131  | -2.0863584 |
| C             | -0.8610178 | 1.0198691  | -1.7140754 |
| C             | 0.0773162  | 0.3372421  | -0.9772164 |
| C             | 1.4157132  | 0.8532201  | -0.5570794 |
| N             | 1.6878712  | 0.6578421  | 0.8641806  |
| C             | 0.7542582  | 0.7104151  | 1.8252476  |
| C             | -0.6822098 | 0.7980091  | 1.5583406  |
| O             | 0.9578602  | 0.7375051  | 3.0361686  |
| C             | 1.6130402  | 2.3084831  | -1.0306374 |
| O             | 1.6026352  | 2.5304661  | -2.2315334 |
| N             | 1.7463122  | 3.2438181  | -0.0660414 |
| C             | -1.8684798 | 0.8262051  | 1.9790656  |
| Au            | -3.3784468 | -0.0270659 | 0.7053236  |
| C             | -2.4541928 | 1.1785711  | 3.3184226  |
| C             | 1.8992492  | 4.6974591  | -0.3179244 |
| C             | 1.9994882  | 5.3560271  | 1.0510116  |
| C             | 3.1703872  | 4.9575711  | -1.1186394 |
| C             | 0.6712622  | 5.2182681  | -1.0579424 |
| C             | 3.3266832  | -3.3173559 | 1.7341356  |

|   |            |            |            |
|---|------------|------------|------------|
| C | 4.0148062  | -3.7136829 | 0.5777736  |
| C | 4.4431382  | -2.7502949 | -0.3366174 |
| C | 4.1708962  | -1.4058519 | -0.0918104 |
| C | 3.4792912  | -1.0021579 | 1.0461416  |
| C | 3.0663632  | -1.9795859 | 1.9626516  |
| C | 3.0936472  | 0.4305171  | 1.2619286  |
| O | 4.2167612  | -5.0393729 | 0.4456796  |
| C | 4.9438392  | -5.4938339 | -0.6748674 |
| H | -0.0887688 | -4.3085279 | -0.0981834 |
| H | -2.1833238 | -4.4179729 | -1.4065304 |
| H | -3.1410538 | -2.3769969 | -2.4495224 |
| H | 1.1220122  | -2.1732809 | 0.1927236  |
| H | -2.6048628 | 0.4076231  | -2.7248034 |
| H | -0.8584208 | 2.0548731  | -2.0321314 |
| H | 2.1784252  | 0.2640101  | -1.0916744 |
| H | 1.7820102  | 2.9392621  | 0.8972446  |
| H | -1.6513238 | 1.4475921  | 4.0109376  |
| H | -3.1580518 | 2.0105911  | 3.2191636  |
| H | -3.0101878 | 0.3281291  | 3.7253756  |
| H | 1.0958432  | 5.1754711  | 1.6476916  |
| H | 2.1142912  | 6.4389301  | 0.9370066  |
| H | 2.8699872  | 4.9858791  | 1.6079056  |
| H | 3.1267112  | 4.4653561  | -2.0939384 |
| H | 3.2933022  | 6.0352961  | -1.2775734 |
| H | 4.0503202  | 4.5919011  | -0.5758954 |
| H | 0.5844772  | 4.7553211  | -2.0450304 |
| H | 0.7509442  | 6.3034271  | -1.1912954 |

|                |            |            |            |
|----------------|------------|------------|------------|
| H              | -0.2404588 | 5.0117061  | -0.4827004 |
| H              | 3.0237942  | -4.0870219 | 2.4393186  |
| H              | 4.9898782  | -3.0308619 | -1.2315284 |
| H              | 4.5182382  | -0.6583219 | -0.8056574 |
| H              | 2.5344172  | -1.6762899 | 2.8643206  |
| H              | 3.1776752  | 0.7217621  | 2.3138206  |
| H              | 3.7177602  | 1.1108881  | 0.6680506  |
| H              | 5.0089152  | -6.5788619 | -0.5809584 |
| H              | 5.9585202  | -5.0735059 | -0.6931794 |
| H              | 4.4333512  | -5.2443079 | -1.6153764 |
| P              | -5.3627868 | -1.0033469 | -0.1188754 |
| C              | -5.7600788 | -0.6674859 | -1.8679444 |
| H              | -4.9871308 | -1.0850149 | -2.5202154 |
| H              | -6.7228118 | -1.1233549 | -2.1274504 |
| H              | -5.8204598 | 0.4128951  | -2.0323644 |
| C              | -6.8374008 | -0.4270689 | 0.7848446  |
| H              | -7.7363868 | -0.9222919 | 0.3996706  |
| H              | -6.7293978 | -0.6548709 | 1.8495976  |
| H              | -6.9443558 | 0.6558981  | 0.6707366  |
| C              | -5.3968508 | -2.8167329 | 0.0459736  |
| H              | -6.3298158 | -3.2212659 | -0.3634394 |
| H              | -4.5385998 | -3.2477429 | -0.4788564 |
| H              | -5.3199098 | -3.0835399 | 1.1045616  |
| <b>A- intl</b> |            |            |            |
| C              | 2.3923592  | -2.8092234 | 2.3261747  |
| C              | 2.9484192  | -2.4139454 | 3.5431917  |
| C              | 2.7299112  | -1.1348294 | 4.0521647  |

|    |            |            |            |
|----|------------|------------|------------|
| C  | 1.9402532  | -0.2989654 | 3.2845477  |
| C  | 1.3722572  | -0.6695894 | 2.0684697  |
| C  | 1.5986972  | -1.9425594 | 1.5731657  |
| N  | 1.5270792  | 1.0334586  | 3.5543417  |
| C  | 0.8009672  | 1.5220816  | 2.5811007  |
| C  | 0.6333692  | 0.5154686  | 1.4846827  |
| N  | 1.3422822  | 3.1757166  | -0.9229153 |
| C  | 1.5660282  | 2.5063346  | 0.2071867  |
| C  | 1.3408862  | 0.9924826  | 0.1637807  |
| O  | 1.9834702  | 2.9917136  | 1.2654807  |
| N  | 0.5104252  | 0.5297026  | -0.9093173 |
| C  | -0.7508568 | 0.1314186  | -0.4794613 |
| C  | -0.8048018 | 0.2680816  | 0.9984067  |
| O  | -1.6059558 | -0.2905464 | -1.2386323 |
| C  | -1.9225468 | 0.0664586  | 1.7255997  |
| C  | -1.9256378 | 0.1012446  | 3.2159827  |
| Au | -3.7287938 | -0.3305904 | 0.7592857  |
| C  | 3.6511572  | -2.7051464 | -1.4229673 |
| C  | 2.8504972  | -3.8520714 | -1.3895373 |
| C  | 1.4813082  | -3.7493854 | -1.6555643 |
| C  | 0.9275512  | -2.5028494 | -1.9349943 |
| C  | 1.7133592  | -1.3506104 | -1.9548333 |
| C  | 3.0847632  | -1.4739674 | -1.7059743 |
| C  | 1.0768642  | -0.0060994 | -2.1555513 |
| O  | 3.4872302  | -5.0031234 | -1.0877943 |
| C  | 2.7370392  | -6.1974094 | -1.0823503 |
| C  | 1.5584492  | 4.6322466  | -1.1315913 |

|   |            |            |            |
|---|------------|------------|------------|
| C | 1.1843332  | 4.9092436  | -2.5805143 |
| C | 3.0265542  | 4.9642206  | -0.8932403 |
| C | 0.6562302  | 5.4249056  | -0.1922643 |
| H | 2.5830692  | -3.8126144 | 1.9526247  |
| H | 3.5619352  | -3.1118894 | 4.1058567  |
| H | 3.1592132  | -0.8180384 | 4.9989347  |
| H | 1.1750332  | -2.2615804 | 0.6214607  |
| H | 1.7434562  | 1.5383516  | 4.4061857  |
| H | 0.2672512  | 2.4579656  | 2.6853657  |
| H | 0.8763792  | 2.6547246  | -1.6580183 |
| H | 2.3449642  | 0.5404666  | 0.1064277  |
| H | -2.6081948 | 0.8811236  | 3.5775697  |
| H | -0.9429528 | 0.2574216  | 3.6856197  |
| H | -2.3297188 | -0.8405304 | 3.6079167  |
| H | 4.7151312  | -2.8146374 | -1.2306283 |
| H | 0.8449142  | -4.6293224 | -1.6563273 |
| H | -0.1407718 | -2.4195134 | -2.1315903 |
| H | 3.7220752  | -0.5897394 | -1.7470933 |
| H | 1.8067142  | 0.7163996  | -2.5460793 |
| H | 0.2405582  | -0.0607454 | -2.8608883 |
| H | 3.4346562  | -6.9994214 | -0.8362573 |
| H | 2.2912542  | -6.3990684 | -2.0657473 |
| H | 1.9396092  | -6.1701774 | -0.3256283 |
| H | 0.1310152  | 4.6685706  | -2.7742703 |
| H | 1.8126152  | 4.3324806  | -3.2706743 |
| H | 1.3289832  | 5.9709706  | -2.8046573 |
| H | 3.3213082  | 4.7420836  | 0.1366477  |



|   |            |            |            |
|---|------------|------------|------------|
| H | 3.6688532  | 4.3956496  | -1.5757773 |
| H | 3.1948742  | 6.0312556  | -1.0777633 |
| H | 0.9084122  | 5.2282406  | 0.8538997  |
| H | -0.3976338 | 5.1722366  | -0.3595703 |
| H | 0.7823232  | 6.4974586  | -0.3792153 |
| P | -5.7280518 | -0.7831464 | -0.4336283 |
| C | -5.3794548 | -0.9203084 | -2.2210063 |
| H | -6.2905328 | -1.1429414 | -2.7886573 |
| H | -4.9447128 | 0.0196146  | -2.5754243 |
| H | -4.6400928 | -1.7110054 | -2.3827733 |
| C | -6.5843628 | -2.3444834 | -0.0268163 |
| H | -6.9128578 | -2.3242804 | 1.0166237  |
| H | -7.4545638 | -2.4883974 | -0.6780153 |
| H | -5.8943438 | -3.1840714 | -0.1540033 |
| C | -7.0481768 | 0.4753726  | -0.3338373 |
| H | -6.6544328 | 1.4450796  | -0.6530053 |
| H | -7.8939898 | 0.1989586  | -0.9742943 |
| H | -7.3929048 | 0.5676176  | 0.7004547  |

**A- ts2**

|   |            |            |            |
|---|------------|------------|------------|
| C | -0.5215771 | -2.0620617 | 2.2140680  |
| C | -1.4861011 | -1.3260667 | 2.9014190  |
| C | -1.9132711 | -0.0790817 | 2.4381500  |
| C | -1.3376161 | 0.3795793  | 1.2663130  |
| C | -0.3624151 | -0.3342337 | 0.5752700  |
| C | 0.0543099  | -1.5685107 | 1.0415640  |
| N | -1.5856771 | 1.5829653  | 0.5590560  |
| C | -0.6956541 | 1.7470123  | -0.4334090 |

|    |            |            |            |
|----|------------|------------|------------|
| C  | 0.0324449  | 0.4234313  | -0.6671520 |
| N  | 0.8421779  | 2.7208713  | 0.2564720  |
| C  | 1.8522119  | 2.1341373  | -0.6029290 |
| C  | 1.5558439  | 0.6611523  | -0.8045260 |
| O  | 2.7330359  | 2.7566403  | -1.1239410 |
| N  | 1.9199139  | 0.2195603  | -2.1128590 |
| C  | 0.8694179  | -0.3540077 | -2.8173420 |
| C  | -0.3686681 | -0.2261247 | -1.9979720 |
| O  | 1.0201639  | -0.8994857 | -3.8931110 |
| C  | -1.5980951 | -0.6851687 | -2.3220080 |
| C  | -1.8840181 | -1.2731407 | -3.6728280 |
| Au | -3.2514791 | -0.8324357 | -1.0603790 |
| C  | 5.3211509  | -1.4499257 | 0.4828770  |
| C  | 4.9066199  | -2.7853197 | 0.5094680  |
| C  | 3.9820759  | -3.2426807 | -0.4350940 |
| C  | 3.4917519  | -2.3631647 | -1.3959060 |
| C  | 3.9065459  | -1.0322767 | -1.4393500 |
| C  | 4.8222809  | -0.5885177 | -0.4806770 |
| C  | 3.3118479  | -0.0869377 | -2.4438490 |
| O  | 5.4497239  | -3.5499217 | 1.4807880  |
| C  | 5.1278959  | -4.9215207 | 1.5055020  |
| C  | 0.8159629  | 4.2152383  | 0.4885700  |
| C  | -0.4126001 | 4.5089343  | 1.3413080  |
| C  | 0.7086539  | 4.9441303  | -0.8431540 |
| C  | 2.0766589  | 4.6151213  | 1.2476600  |
| H  | -0.2075291 | -3.0266787 | 2.6027490  |
| H  | -1.9048181 | -1.7211597 | 3.8238680  |

|   |            |            |            |
|---|------------|------------|------------|
| H | -2.6506351 | 0.5050103  | 2.9851860  |
| H | 0.8138109  | -2.1344907 | 0.5010210  |
| H | -2.3548161 | 2.2096233  | 0.7484150  |
| H | -0.9313041 | 2.4177473  | -1.2577480 |
| H | 2.1162199  | 0.1029653  | -0.0267590 |
| H | -2.1085821 | -2.3430337 | -3.5594000 |
| H | -1.0662551 | -1.1691597 | -4.3883850 |
| H | -2.7977851 | -0.8263457 | -4.0845400 |
| H | 6.0438179  | -1.1214737 | 1.2253210  |
| H | 3.6575489  | -4.2791757 | -0.4418430 |
| H | 2.7825619  | -2.7237927 | -2.1420060 |
| H | 5.1549399  | 0.4500993  | -0.5018360 |
| H | 3.8863819  | 0.8444293  | -2.5005660 |
| H | 3.2713169  | -0.5255417 | -3.4474640 |
| H | 5.6927289  | -5.3570997 | 2.3313400  |
| H | 5.4165009  | -5.4209517 | 0.5704640  |
| H | 4.0547919  | -5.0838617 | 1.6814560  |
| H | -0.4357581 | 3.9007413  | 2.2557080  |
| H | -1.3450781 | 4.3569413  | 0.7845070  |
| H | -0.3904571 | 5.5598943  | 1.6478810  |
| H | 1.5997879  | 4.8130943  | -1.4602720 |
| H | -0.1708151 | 4.6211603  | -1.4143750 |
| H | 0.5868469  | 6.0143973  | -0.6440390 |
| H | 2.9799379  | 4.4027763  | 0.6707980  |
| H | 2.1377879  | 4.0985423  | 2.2144420  |
| H | 2.0475409  | 5.6912433  | 1.4520310  |
| P | -5.2030441 | -1.2175227 | 0.2711530  |

|   |            |            |            |
|---|------------|------------|------------|
| C | -5.7686271 | 0.1935253  | 1.2901490  |
| H | -6.6492681 | -0.0809377 | 1.8826900  |
| H | -4.9651891 | 0.4996763  | 1.9688330  |
| H | -6.0228261 | 1.0382823  | 0.6422780  |
| C | -6.6965011 | -1.6927467 | -0.6660300 |
| H | -6.4913081 | -2.5977887 | -1.2459320 |
| H | -7.5370571 | -1.8810157 | 0.0121240  |
| H | -6.9657721 | -0.8936217 | -1.3633710 |
| C | -4.9954721 | -2.5684647 | 1.4830600  |
| H | -4.1491911 | -2.3391637 | 2.1392420  |
| H | -5.9032771 | -2.7013627 | 2.0831660  |
| H | -4.7724631 | -3.4997087 | 0.9531800  |
| H | 0.8577939  | 2.2367603  | 1.1615070  |

**A- int2**

|   |            |            |            |
|---|------------|------------|------------|
| C | 1.2458851  | -2.3010150 | -2.4365196 |
| C | 2.1584241  | -1.5205840 | -3.1477076 |
| C | 2.3687401  | -0.1799920 | -2.8241226 |
| C | 1.6417771  | 0.3482640  | -1.7663216 |
| C | 0.7239081  | -0.4178390 | -1.0547936 |
| C | 0.5165541  | -1.7490760 | -1.3846536 |
| N | 1.6885631  | 1.6821430  | -1.2827136 |
| C | 0.7347051  | 1.8072340  | -0.2175216 |
| C | 0.0737811  | 0.4069160  | 0.0219864  |
| N | -0.3715939 | 2.7611640  | -0.6843816 |
| C | -1.6330989 | 1.9009930  | -0.8985256 |
| C | -1.4357259 | 0.5926170  | -0.1916486 |
| O | -2.5404839 | 2.3189980  | -1.5399016 |

|    |            |            |            |
|----|------------|------------|------------|
| N  | -1.9842699 | 0.7286970  | 1.1328514  |
| C  | -1.1240989 | 0.2032890  | 2.1127564  |
| C  | 0.1868131  | -0.0508800 | 1.4684414  |
| O  | -1.4890059 | 0.0324680  | 3.2588674  |
| C  | 1.3030901  | -0.5440150 | 2.0518754  |
| C  | 1.3423971  | -0.9139980 | 3.5025044  |
| Au | 3.0783951  | -0.9147080 | 1.0255014  |
| C  | -5.2933249 | -1.6180770 | -1.0002736 |
| C  | -5.2590299 | -2.8133490 | -0.2734486 |
| C  | -4.6378559 | -2.8460290 | 0.9784174  |
| C  | -4.0638629 | -1.6870750 | 1.4898944  |
| C  | -4.0998709 | -0.4886600 | 0.7781444  |
| C  | -4.7196069 | -0.4724210 | -0.4762646 |
| C  | -3.4367079 | 0.7384820  | 1.3330114  |
| O  | -5.8491159 | -3.8739120 | -0.8627016 |
| C  | -5.8850259 | -5.0934330 | -0.1564356 |
| C  | -0.5407599 | 4.0996750  | 0.1105754  |
| C  | 0.8117931  | 4.7965800  | 0.0520424  |
| C  | -0.9667529 | 3.7922420  | 1.5319474  |
| C  | -1.5836919 | 4.9416340  | -0.6079236 |
| H  | 1.0949931  | -3.3410490 | -2.7124166 |
| H  | 2.7036531  | -1.9577640 | -3.9814206 |
| H  | 3.0563031  | 0.4380500  | -3.3982116 |
| H  | -0.1905949 | -2.3511990 | -0.8156336 |
| H  | 2.6159681  | 2.0387680  | -1.0764176 |
| H  | 1.1595741  | 2.2122020  | 0.7030524  |
| H  | -1.9181329 | -0.2117000 | -0.7718156 |

|   |            |            |            |
|---|------------|------------|------------|
| H | 1.5859471  | -1.9807090 | 3.5980064  |
| H | 0.4134211  | -0.7130130 | 4.0409934  |
| H | 2.1705191  | -0.3863150 | 3.9936504  |
| H | -5.7867429 | -1.6192190 | -1.9685896 |
| H | -4.6071279 | -3.7606290 | 1.5629074  |
| H | -3.5857069 | -1.7102580 | 2.4688164  |
| H | -4.7565209 | 0.4575620  | -1.0450816 |
| H | -3.8518159 | 1.6475010  | 0.8729564  |
| H | -3.5719299 | 0.8171430  | 2.4175504  |
| H | -6.4163439 | -5.8031640 | -0.7925696 |
| H | -6.4232339 | -4.9924980 | 0.7960034  |
| H | -4.8741439 | -5.4767290 | 0.0415964  |
| H | 1.1426951  | 4.9539870  | -0.9825556 |
| H | 1.5975221  | 4.2658900  | 0.5995404  |
| H | 0.7106861  | 5.7828920  | 0.5165884  |
| H | -1.9443749 | 3.2995020  | 1.5708264  |
| H | -0.2476649 | 3.1682970  | 2.0749354  |
| H | -1.0482919 | 4.7414420  | 2.0723714  |
| H | -2.5858619 | 4.5104680  | -0.5551716 |
| H | -1.3289849 | 5.0996340  | -1.6629606 |
| H | -1.6138819 | 5.9236710  | -0.1242446 |
| P | 5.1329141  | -1.4730350 | -0.0715106 |
| C | 5.7927101  | -0.1944060 | -1.2011136 |
| H | 6.7179401  | -0.5362070 | -1.6797446 |
| H | 5.0460611  | 0.0201630  | -1.9739126 |
| H | 5.9972781  | 0.7235360  | -0.6409316 |
| C | 6.5374371  | -1.8342920 | 1.0390274  |

|   |            |            |            |
|---|------------|------------|------------|
| H | 6.2746371  | -2.6629840 | 1.7036524  |
| H | 7.4297671  | -2.1034490 | 0.4617994  |
| H | 6.7562851  | -0.9572720 | 1.6557994  |
| C | 5.0125451  | -2.9588830 | -1.1276596 |
| H | 4.2378371  | -2.8009870 | -1.8865086 |
| H | 5.9714241  | -3.1688560 | -1.6160386 |
| H | 4.7225351  | -3.8184630 | -0.5154456 |
| H | -0.0902419 | 3.0460410  | -1.6330806 |

**A- ts3**

|   |            |            |            |
|---|------------|------------|------------|
| C | -1.0987295 | -2.2777749 | 2.4537624  |
| C | -1.9519095 | -1.4647139 | 3.2038854  |
| C | -2.1690365 | -0.1352089 | 2.8469444  |
| C | -1.5106315 | 0.3313051  | 1.7201034  |
| C | -0.6562935 | -0.4574969 | 0.9634534  |
| C | -0.4404235 | -1.7791809 | 1.3328784  |
| N | -1.5742535 | 1.6733031  | 1.1900674  |
| C | -0.7237315 | 1.6986941  | -0.0490146 |
| C | -0.0538065 | 0.3083351  | -0.1814396 |
| N | 0.2744215  | 2.6777501  | 0.4611524  |
| C | 1.5664975  | 1.9829991  | 0.5957254  |
| C | 1.4437115  | 0.5921641  | 0.0133124  |
| O | 2.5429765  | 2.4958101  | 1.0572004  |
| N | 1.9764005  | 0.6337821  | -1.3277826 |
| C | 1.1490085  | -0.0251789 | -2.2462806 |
| C | -0.1593915 | -0.2622869 | -1.5835016 |
| O | 1.5161245  | -0.3083599 | -3.3693736 |
| C | -1.2732255 | -0.8049359 | -2.1220156 |

|    |            |            |            |
|----|------------|------------|------------|
| C  | -1.3158295 | -1.2928559 | -3.5368146 |
| Au | -3.0434585 | -1.0696289 | -1.0555986 |
| C  | 5.4078365  | -1.3454519 | 0.9797424  |
| C  | 5.4215755  | -2.6051169 | 0.3715544  |
| C  | 4.7922175  | -2.7855389 | -0.8633786 |
| C  | 4.1612445  | -1.7073659 | -1.4758056 |
| C  | 4.1482325  | -0.4457019 | -0.8825906 |
| C  | 4.7783795  | -0.2817019 | 0.3561244  |
| C  | 3.4263595  | 0.6948571  | -1.5414546 |
| O  | 6.0640525  | -3.5780509 | 1.0528174  |
| C  | 6.1555035  | -4.8538399 | 0.4617104  |
| C  | 0.2740635  | 4.1052921  | -0.1046646 |
| C  | -1.1669285 | 4.6019071  | -0.1372246 |
| C  | 0.8738275  | 4.0626251  | -1.5006786 |
| C  | 1.0753375  | 5.0022671  | 0.8296564  |
| H  | -0.9412965 | -3.3099249 | 2.7549004  |
| H  | -2.4421075 | -1.8673709 | 4.0868124  |
| H  | -2.8115135 | 0.5120711  | 3.4405264  |
| H  | 0.2195635  | -2.4093539 | 0.7393204  |
| H  | -2.5200755 | 2.0427751  | 1.0792144  |
| H  | -1.2625855 | 2.0153181  | -0.9436056 |
| H  | 1.9700345  | -0.1377129 | 0.6505984  |
| H  | -1.5624835 | -2.3630209 | -3.5473276 |
| H  | -0.3833215 | -1.1380419 | -4.0849086 |
| H  | -2.1392085 | -0.8014739 | -4.0716906 |
| H  | 5.9095975  | -1.2313739 | 1.9370954  |
| H  | 4.7991835  | -3.7522849 | -1.3580006 |



|   |            |            |            |
|---|------------|------------|------------|
| H | 3.6766505  | -1.8450269 | -2.4421716 |
| H | 4.7765335  | 0.6992241  | 0.8323514  |
| H | 3.7973685  | 1.6580461  | -1.1669376 |
| H | 3.5537795  | 0.6793421  | -2.6291676 |
| H | 6.7255245  | -5.4754879 | 1.1542184  |
| H | 6.6814065  | -4.8158009 | -0.5022076 |
| H | 5.1637145  | -5.3032229 | 0.3106144  |
| H | -1.6132225 | 4.6182601  | 0.8657024  |
| H | -1.8135265 | 4.0349281  | -0.8166766 |
| H | -1.1650475 | 5.6343901  | -0.5011766 |
| H | 1.9182205  | 3.7314921  | -1.4797126 |
| H | 0.3143815  | 3.3989851  | -2.1722046 |
| H | 0.8531265  | 5.0682531  | -1.9347066 |
| H | 2.1352365  | 4.7472971  | 0.8507974  |
| H | 0.6867695  | 4.9522041  | 1.8538264  |
| H | 0.9744355  | 6.0361011  | 0.4816434  |
| P | -5.0844555 | -1.4883809 | 0.1343834  |
| C | -5.6409875 | -0.1173169 | 1.2115044  |
| H | -6.5565135 | -0.3879509 | 1.7504924  |
| H | -4.8513405 | 0.1064231  | 1.9383634  |
| H | -5.8327905 | 0.7750211  | 0.6070284  |
| C | -6.5489555 | -1.8571319 | -0.8920016 |
| H | -6.3493515 | -2.7365329 | -1.5119046 |
| H | -7.4254275 | -2.0507829 | -0.2626156 |
| H | -6.7585905 | -1.0121569 | -1.5549316 |
| C | -4.9739825 | -2.9067069 | 1.2809154  |
| H | -4.1700635 | -2.7236769 | 2.0029954  |

|                |            |            |            |
|----------------|------------|------------|------------|
| H              | -5.9208505 | -3.0540799 | 1.8135634  |
| H              | -4.7302405 | -3.8136609 | 0.7190824  |
| <b>A- int3</b> |            |            |            |
| C              | -0.9398949 | -1.9726458 | 2.7104110  |
| C              | -1.8991959 | -1.1464588 | 3.3029700  |
| C              | -2.2349209 | 0.0766192  | 2.7274380  |
| C              | -1.5597279 | 0.4187262  | 1.5682110  |
| C              | -0.5960779 | -0.3670958 | 0.9681290  |
| C              | -0.2805329 | -1.5922338 | 1.5459470  |
| N              | -1.8116719 | 1.6133592  | 0.7506070  |
| C              | -0.6162699 | 1.6992122  | -0.2683680 |
| C              | -0.0057189 | 0.2709962  | -0.2515130 |
| N              | 0.3562381  | 2.6123222  | 0.1994110  |
| C              | 1.6114941  | 1.9916082  | 0.3288200  |
| C              | 1.4927161  | 0.5449952  | -0.1108640 |
| O              | 2.6398641  | 2.5427172  | 0.6370290  |
| N              | 1.9894471  | 0.4307782  | -1.4629740 |
| C              | 1.1440391  | -0.3043318 | -2.2878650 |
| C              | -0.1602429 | -0.4494878 | -1.5773400 |
| O              | 1.4709841  | -0.7103628 | -3.3864790 |
| C              | -1.2927209 | -1.0189398 | -2.0371720 |
| C              | -1.3697109 | -1.6552078 | -3.3922350 |
| Au             | -3.0758029 | -1.1543208 | -0.9687450 |
| C              | 5.5246121  | -1.1617548 | 0.9509310  |
| C              | 5.5974081  | -2.4740868 | 0.4719070  |
| C              | 4.9677001  | -2.8097058 | -0.7294590 |
| C              | 4.2788991  | -1.8303398 | -1.4388370 |

|   |            |            |            |
|---|------------|------------|------------|
| C | 4.2086891  | -0.5176028 | -0.9761690 |
| C | 4.8380101  | -0.1978138 | 0.2322120  |
| C | 3.4263881  | 0.5145042  | -1.7377420 |
| O | 6.2942741  | -3.3409918 | 1.2399140  |
| C | 6.4485761  | -4.6618698 | 0.7763070  |
| C | 0.2701871  | 4.0873972  | -0.1144510 |
| C | -1.1917369 | 4.5225592  | -0.1787460 |
| C | 0.9400061  | 4.3160032  | -1.4654920 |
| C | 0.9467951  | 4.8876742  | 0.9940330  |
| H | -0.6956929 | -2.9230608 | 3.1771990  |
| H | -2.3822309 | -1.4548638 | 4.2263140  |
| H | -2.9749019 | 0.7325952  | 3.1819660  |
| H | 0.4678871  | -2.2352178 | 1.0869620  |
| H | -2.6899219 | 1.4949292  | 0.2233060  |
| H | -1.0755249 | 1.9594442  | -1.2295910 |
| H | 2.0245531  | -0.1238858 | 0.5852900  |
| H | -1.6483879 | -2.7127038 | -3.2907870 |
| H | -0.4353359 | -1.5872458 | -3.9550880 |
| H | -2.1776169 | -1.1929788 | -3.9747590 |
| H | 6.0271821  | -0.9275578 | 1.8858570  |
| H | 5.0181181  | -3.8201728 | -1.1241710 |
| H | 3.7924091  | -2.0884698 | -2.3793370 |
| H | 4.7823291  | 0.8243862  | 0.6073590  |
| H | 3.7693181  | 1.5267642  | -1.4909620 |
| H | 3.5194761  | 0.3716792  | -2.8195160 |
| H | 7.0582231  | -5.1812388 | 1.5177890  |
| H | 6.9619411  | -4.6925878 | -0.1947390 |

|               |            |            |            |
|---------------|------------|------------|------------|
| H             | 5.4812631  | -5.1764348 | 0.6849120  |
| H             | -1.6884739 | 4.4560392  | 0.8011550  |
| H             | -1.7831909 | 3.9901892  | -0.9338280 |
| H             | -1.2217989 | 5.5813462  | -0.4554920 |
| H             | 1.9966601  | 4.0309902  | -1.4310880 |
| H             | 0.4498381  | 3.7349762  | -2.2580350 |
| H             | 0.8861481  | 5.3750382  | -1.7413450 |
| H             | 2.0158921  | 4.6819292  | 1.0517930  |
| H             | 0.4972011  | 4.6564392  | 1.9674970  |
| H             | 0.8020591  | 5.9562432  | 0.7981930  |
| P             | -5.1753109 | -1.4810838 | 0.1629040  |
| C             | -5.8558209 | -0.0203358 | 1.0319220  |
| H             | -6.7974189 | -0.2689358 | 1.5353730  |
| H             | -5.1357879 | 0.3254302  | 1.7823350  |
| H             | -6.0395339 | 0.7869402  | 0.3155150  |
| C             | -6.5486019 | -2.0239168 | -0.9102310 |
| H             | -6.2756459 | -2.9593458 | -1.4082750 |
| H             | -7.4604999 | -2.1812708 | -0.3225220 |
| H             | -6.7391259 | -1.2696728 | -1.6797490 |
| C             | -5.0963049 | -2.7560348 | 1.4683200  |
| H             | -4.3403619 | -2.4705418 | 2.2075680  |
| H             | -6.0680889 | -2.8726758 | 1.9621190  |
| H             | -4.7985099 | -3.7121778 | 1.0269770  |
| H             | -1.8585139 | 2.4828292  | 1.2910610  |
| <b>A- ts4</b> |            |            |            |
| C             | -1.7407574 | -0.4062973 | 2.9762040  |
| C             | -2.7486254 | 0.5515827  | 2.8947550  |

|    |            |            |            |
|----|------------|------------|------------|
| C  | -2.8248854 | 1.4276157  | 1.8053530  |
| C  | -1.8470814 | 1.2954657  | 0.8422200  |
| C  | -0.8331884 | 0.3435807  | 0.8994190  |
| C  | -0.7704634 | -0.5241803 | 1.9749210  |
| N  | -1.6960304 | 1.9887317  | -0.4139610 |
| C  | -0.2301244 | 1.9909977  | -0.6920610 |
| C  | 0.0394076  | 0.5029027  | -0.3149020 |
| N  | 0.7034866  | 2.7217197  | 0.1139570  |
| C  | 1.8513956  | 1.9309847  | 0.2716910  |
| C  | 1.5316306  | 0.4889607  | -0.1388490 |
| O  | 2.9394436  | 2.3168317  | 0.6312320  |
| N  | 1.9936736  | 0.1770627  | -1.4788010 |
| C  | 1.0179386  | -0.3557563 | -2.3055110 |
| C  | -0.2975454 | -0.2121563 | -1.5887140 |
| O  | 1.2129766  | -0.8309633 | -3.4064550 |
| C  | -1.5649034 | -0.2589923 | -2.0712010 |
| C  | -1.8414584 | -0.5730733 | -3.5183760 |
| Au | -3.1816224 | -0.9925523 | -0.8433060 |
| C  | 5.2494606  | -1.7529703 | 1.0301200  |
| C  | 5.1740116  | -3.0842673 | 0.6057960  |
| C  | 4.5342176  | -3.3941173 | -0.5972020 |
| C  | 3.9823716  | -2.3707803 | -1.3618830 |
| C  | 4.0607506  | -1.0413483 | -0.9534640 |
| C  | 4.6991836  | -0.7455603 | 0.2564940  |
| C  | 3.4229756  | 0.0431907  | -1.7730190 |
| O  | 5.7451696  | -3.9934673 | 1.4254950  |
| C  | 5.7417626  | -5.3438303 | 1.0245990  |

|   |            |            |            |
|---|------------|------------|------------|
| C | 0.8171156  | 4.2187557  | 0.0772600  |
| C | -0.5698824 | 4.8166757  | -0.1306440 |
| C | 1.7354916  | 4.6366187  | -1.0667800 |
| C | 1.3478776  | 4.6987487  | 1.4244650  |
| H | -1.6971594 | -1.0630303 | 3.8416280  |
| H | -3.4782984 | 0.6343457  | 3.6966750  |
| H | -3.6046564 | 2.1829387  | 1.7370410  |
| H | 0.0178206  | -1.2697323 | 2.0504960  |
| H | -1.9986464 | 1.0602777  | -1.2755370 |
| H | -0.1211044 | 2.2057767  | -1.7661380 |
| H | 1.9342136  | -0.2140473 | 0.6064470  |
| H | -2.1134774 | -1.6301193 | -3.6402990 |
| H | -0.9700594 | -0.3952623 | -4.1570410 |
| H | -2.6956524 | 0.0077727  | -3.8832350 |
| H | 5.7570516  | -1.5406693 | 1.9674850  |
| H | 4.4711936  | -4.4194403 | -0.9492750 |
| H | 3.4873426  | -2.6102103 | -2.3032000 |
| H | 4.7573216  | 0.2911897  | 0.5897350  |
| H | 3.9043906  | 1.0111077  | -1.5855840 |
| H | 3.4825046  | -0.1711713 | -2.8455000 |
| H | 6.2637156  | -5.8998753 | 1.8052790  |
| H | 6.2693116  | -5.4838823 | 0.0709580  |
| H | 4.7192786  | -5.7361363 | 0.9283640  |
| H | -1.2626994 | 4.5097207  | 0.6656400  |
| H | -0.9894854 | 4.5796847  | -1.1187280 |
| H | -0.4924064 | 5.9078337  | -0.0850800 |
| H | 2.7493756  | 4.2553127  | -0.9174290 |

|            |            |            |            |
|------------|------------|------------|------------|
| H          | 1.3604276  | 4.2752697  | -2.0335590 |
| H          | 1.7885886  | 5.7299377  | -1.1202430 |
| H          | 2.3522806  | 4.3192307  | 1.6203430  |
| H          | 0.6838756  | 4.3756427  | 2.2348810  |
| H          | 1.3830416  | 5.7941757  | 1.4263130  |
| P          | -4.9219564 | -2.0881523 | 0.3208880  |
| C          | -6.1604084 | -0.9594543 | 1.0432820  |
| H          | -6.9262924 | -1.5268193 | 1.5849760  |
| H          | -5.6641144 | -0.2702203 | 1.7342700  |
| H          | -6.6372704 | -0.3756743 | 0.2502040  |
| C          | -5.8953194 | -3.2563123 | -0.6844100 |
| H          | -5.2377434 | -4.0301883 | -1.0917210 |
| H          | -6.6738884 | -3.7282453 | -0.0738430 |
| H          | -6.3629424 | -2.7260033 | -1.5194300 |
| C          | -4.3301774 | -3.0730983 | 1.7371200  |
| H          | -3.8026244 | -2.4157963 | 2.4365140  |
| H          | -5.1712984 | -3.5546173 | 2.2494160  |
| H          | -3.6316284 | -3.8395323 | 1.3879850  |
| H          | -2.1961964 | 2.8673567  | -0.5345390 |
| <b>A-2</b> |            |            |            |
| C          | -1.1068597 | -3.1564879 | 2.7324637  |
| C          | -2.4041387 | -3.6653259 | 2.6985807  |
| C          | -3.3426737 | -3.2096039 | 1.7751767  |
| C          | -2.9460757 | -2.2308899 | 0.8709607  |
| C          | -1.6415477 | -1.7280349 | 0.8808867  |
| C          | -0.7219617 | -2.1761589 | 1.8169297  |
| N          | -3.6787357 | -1.6366279 | -0.1490793 |

|    |            |            |            |
|----|------------|------------|------------|
| C  | -3.0084577 | -0.4360619 | -0.5934753 |
| C  | -1.5108447 | -0.7225409 | -0.2299973 |
| N  | -3.3185327 | 0.8016901  | 0.1285427  |
| C  | -2.1859167 | 1.4672191  | 0.5299577  |
| C  | -0.9721447 | 0.6481651  | 0.1281727  |
| O  | -2.1020187 | 2.5729811  | 1.0308647  |
| N  | -0.4621307 | 1.1537251  | -1.1425143 |
| C  | -0.2229917 | 0.1802631  | -2.0716273 |
| C  | -0.7392847 | -1.1067619 | -1.4687173 |
| O  | 0.3443093  | 0.3237051  | -3.1400563 |
| C  | -0.6808947 | -2.3568479 | -2.0308053 |
| C  | -0.2114797 | -2.6953029 | -3.4059293 |
| Au | 1.3568893  | -1.9155729 | -0.7699933 |
| C  | 2.8173803  | 2.9105441  | 1.4159797  |
| C  | 3.9818713  | 2.5838621  | 0.7104777  |
| C  | 3.8981963  | 2.2296981  | -0.6392563 |
| C  | 2.6515983  | 2.1908821  | -1.2637943 |
| C  | 1.4880113  | 2.5219421  | -0.5719063 |
| C  | 1.5880593  | 2.8848161  | 0.7773287  |
| C  | 0.1502243  | 2.4770331  | -1.2568553 |
| O  | 5.1298503  | 2.6198081  | 1.4230237  |
| C  | 6.3390243  | 2.3708861  | 0.7446567  |
| C  | -4.5867277 | 1.5685231  | -0.1155213 |
| C  | -5.6954267 | 0.6288811  | -0.5781453 |
| C  | -4.3104057 | 2.6046901  | -1.2034263 |
| C  | -5.0394247 | 2.2289521  | 1.1831977  |
| H  | -0.4047537 | -3.5100889 | 3.4822477  |



|   |            |            |            |
|---|------------|------------|------------|
| H | -2.6985927 | -4.4249509 | 3.4184667  |
| H | -4.3568007 | -3.6014739 | 1.7698177  |
| H | 0.2800433  | -1.7455119 | 1.8619607  |
| H | -3.1654017 | -0.2900299 | -1.6740413 |
| H | -0.1940777 | 0.6596891  | 0.9085167  |
| H | 0.4174193  | -3.5923389 | -3.4020933 |
| H | 0.3133823  | -1.8625559 | -3.8779253 |
| H | -1.0913867 | -2.9419649 | -4.0154833 |
| H | 2.9123093  | 3.1994661  | 2.4596017  |
| H | 4.7939243  | 2.0214561  | -1.2190263 |
| H | 2.5851673  | 1.9209541  | -2.3176213 |
| H | 0.6838073  | 3.1613831  | 1.3209767  |
| H | -0.5421527 | 3.2066831  | -0.8214543 |
| H | 0.2464013  | 2.6791541  | -2.3283943 |
| H | 7.1372003  | 2.4784271  | 1.4807667  |
| H | 6.5030703  | 3.0883731  | -0.0704283 |
| H | 6.3670953  | 1.3502681  | 0.3308767  |
| H | -5.9809047 | -0.0783429 | 0.2106587  |
| H | -5.4494647 | 0.0835841  | -1.4979163 |
| H | -6.5835807 | 1.2304251  | -0.7983063 |
| H | -3.5444747 | 3.3173491  | -0.8809303 |
| H | -3.9759217 | 2.1218511  | -2.1318943 |
| H | -5.2224757 | 3.1686641  | -1.4293953 |
| H | -4.3151397 | 2.9635351  | 1.5381087  |
| H | -5.1847477 | 1.4736961  | 1.9643517  |
| H | -5.9980767 | 2.7329521  | 1.0129997  |
| P | 3.4577763  | -1.8809969 | 0.2683777  |

|   |            |            |            |
|---|------------|------------|------------|
| C | 3.9822123  | -3.4803809 | 0.9593987  |
| H | 4.9395893  | -3.3667789 | 1.4811527  |
| H | 3.2265843  | -3.8407789 | 1.6645567  |
| H | 4.0928103  | -4.2179519 | 0.1590097  |
| C | 4.7999843  | -1.3368519 | -0.8288073 |
| H | 4.5757483  | -0.3218299 | -1.1745393 |
| H | 5.7510093  | -1.3378739 | -0.2824873 |
| H | 4.8761493  | -2.0012989 | -1.6942653 |
| C | 3.4430453  | -0.7148319 | 1.6647857  |
| H | 2.8296483  | -1.1216329 | 2.4756107  |
| H | 4.4622913  | -0.5484149 | 2.0356377  |
| H | 3.0193633  | 0.2446951  | 1.3445927  |
| H | -4.6873747 | -1.6618689 | -0.1308973 |
| H | -1.1574487 | -3.1559059 | -1.4526693 |

**A- int4**

|   |           |            |            |
|---|-----------|------------|------------|
| C | 2.3923592 | -2.8092234 | 2.3261747  |
| C | 2.9484192 | -2.4139454 | 3.5431917  |
| C | 2.7299112 | -1.1348294 | 4.0521647  |
| C | 1.9402532 | -0.2989654 | 3.2845477  |
| C | 1.3722572 | -0.6695894 | 2.0684697  |
| C | 1.5986972 | -1.9425594 | 1.5731657  |
| N | 1.5270792 | 1.0334586  | 3.5543417  |
| C | 0.8009672 | 1.5220816  | 2.5811007  |
| C | 0.6333692 | 0.5154686  | 1.4846827  |
| N | 1.3422822 | 3.1757166  | -0.9229153 |
| C | 1.5660282 | 2.5063346  | 0.2071867  |
| C | 1.3408862 | 0.9924826  | 0.1637807  |

|    |            |            |            |
|----|------------|------------|------------|
| O  | 1.9834702  | 2.9917136  | 1.2654807  |
| N  | 0.5104252  | 0.5297026  | -0.9093173 |
| C  | -0.7508568 | 0.1314186  | -0.4794613 |
| C  | -0.8048018 | 0.2680816  | 0.9984067  |
| O  | -1.6059558 | -0.2905464 | -1.2386323 |
| C  | -1.9225468 | 0.0664586  | 1.7255997  |
| C  | -1.9256378 | 0.1012446  | 3.2159827  |
| Au | -3.7287938 | -0.3305904 | 0.7592857  |
| C  | 3.6511572  | -2.7051464 | -1.4229673 |
| C  | 2.8504972  | -3.8520714 | -1.3895373 |
| C  | 1.4813082  | -3.7493854 | -1.6555643 |
| C  | 0.9275512  | -2.5028494 | -1.9349943 |
| C  | 1.7133592  | -1.3506104 | -1.9548333 |
| C  | 3.0847632  | -1.4739674 | -1.7059743 |
| C  | 1.0768642  | -0.0060994 | -2.1555513 |
| O  | 3.4872302  | -5.0031234 | -1.0877943 |
| C  | 2.7370392  | -6.1974094 | -1.0823503 |
| C  | 1.5584492  | 4.6322466  | -1.1315913 |
| C  | 1.1843332  | 4.9092436  | -2.5805143 |
| C  | 3.0265542  | 4.9642206  | -0.8932403 |
| C  | 0.6562302  | 5.4249056  | -0.1922643 |
| H  | 2.5830692  | -3.8126144 | 1.9526247  |
| H  | 3.5619352  | -3.1118894 | 4.1058567  |
| H  | 3.1592132  | -0.8180384 | 4.9989347  |
| H  | 1.1750332  | -2.2615804 | 0.6214607  |
| H  | 1.7434562  | 1.5383516  | 4.4061857  |
| H  | 0.2672512  | 2.4579656  | 2.6853657  |

|   |            |            |            |
|---|------------|------------|------------|
| H | 0.8763792  | 2.6547246  | -1.6580183 |
| H | 2.3449642  | 0.5404666  | 0.1064277  |
| H | -2.6081948 | 0.8811236  | 3.5775697  |
| H | -0.9429528 | 0.2574216  | 3.6856197  |
| H | -2.3297188 | -0.8405304 | 3.6079167  |
| H | 4.7151312  | -2.8146374 | -1.2306283 |
| H | 0.8449142  | -4.6293224 | -1.6563273 |
| H | -0.1407718 | -2.4195134 | -2.1315903 |
| H | 3.7220752  | -0.5897394 | -1.7470933 |
| H | 1.8067142  | 0.7163996  | -2.5460793 |
| H | 0.2405582  | -0.0607454 | -2.8608883 |
| H | 3.4346562  | -6.9994214 | -0.8362573 |
| H | 2.2912542  | -6.3990684 | -2.0657473 |
| H | 1.9396092  | -6.1701774 | -0.3256283 |
| H | 0.1310152  | 4.6685706  | -2.7742703 |
| H | 1.8126152  | 4.3324806  | -3.2706743 |
| H | 1.3289832  | 5.9709706  | -2.8046573 |
| H | 3.3213082  | 4.7420836  | 0.1366477  |
| H | 3.6688532  | 4.3956496  | -1.5757773 |
| H | 3.1948742  | 6.0312556  | -1.0777633 |
| H | 0.9084122  | 5.2282406  | 0.8538997  |
| H | -0.3976338 | 5.1722366  | -0.3595703 |
| H | 0.7823232  | 6.4974586  | -0.3792153 |
| P | -5.7280518 | -0.7831464 | -0.4336283 |
| C | -5.3794548 | -0.9203084 | -2.2210063 |
| H | -6.2905328 | -1.1429414 | -2.7886573 |
| H | -4.9447128 | 0.0196146  | -2.5754243 |

|   |            |            |            |
|---|------------|------------|------------|
| H | -4.6400928 | -1.7110054 | -2.3827733 |
| C | -6.5843628 | -2.3444834 | -0.0268163 |
| H | -6.9128578 | -2.3242804 | 1.0166237  |
| H | -7.4545638 | -2.4883974 | -0.6780153 |
| H | -5.8943438 | -3.1840714 | -0.1540033 |
| C | -7.0481768 | 0.4753726  | -0.3338373 |
| H | -6.6544328 | 1.4450796  | -0.6530053 |
| H | -7.8939898 | 0.1989586  | -0.9742943 |
| H | -7.3929048 | 0.5676176  | 0.7004547  |

**A- ts5**

|   |            |            |            |
|---|------------|------------|------------|
| C | -1.2960467 | -0.9208338 | -4.0326671 |
| C | -0.9788647 | 0.1434472  | -4.8744221 |
| C | -0.6581347 | 1.4030892  | -4.3626381 |
| C | -0.6919037 | 1.5412022  | -2.9894561 |
| C | -0.9985547 | 0.4815402  | -2.1273811 |
| C | -1.2852437 | -0.7686088 | -2.6448241 |
| N | -0.5042107 | 2.7439062  | -2.2208211 |
| C | -0.7790297 | 2.4530532  | -0.9343571 |
| C | -0.6693627 | 0.9610832  | -0.7379871 |
| N | 0.1131593  | 2.6951012  | 0.8539459  |
| C | -0.9765707 | 1.9282002  | 1.4624919  |
| C | -1.3939297 | 0.7267902  | 0.5822929  |
| O | -1.5270647 | 2.2453242  | 2.4795399  |
| N | -0.8511527 | -0.4850478 | 1.1263409  |
| C | 0.3800063  | -0.7877878 | 0.5991269  |
| C | 0.7187853  | 0.2747872  | -0.4063581 |
| O | 1.0453643  | -1.7511718 | 0.9404389  |

|    |            |            |            |
|----|------------|------------|------------|
| C  | 1.9690583  | 0.4263292  | -0.8944121 |
| C  | 2.3850373  | 1.4521322  | -1.9018361 |
| Au | 3.4622563  | -0.9042798 | -0.2583481 |
| C  | -5.2746077 | -1.5964038 | 1.5536889  |
| C  | -5.3138557 | -2.6503368 | 0.6347079  |
| C  | -4.1221947 | -3.2534258 | 0.2187309  |
| C  | -2.9118097 | -2.7986568 | 0.7307769  |
| C  | -2.8620817 | -1.7565688 | 1.6546859  |
| C  | -4.0601477 | -1.1579388 | 2.0542859  |
| C  | -1.5386137 | -1.2560178 | 2.1536859  |
| O  | -6.5420727 | -3.0103898 | 0.2087369  |
| C  | -6.6469177 | -4.0938718 | -0.6865301 |
| C  | 0.5340743  | 4.0277612  | 1.4002679  |
| C  | 1.6494423  | 4.5073062  | 0.4801239  |
| C  | 1.0655843  | 3.8549752  | 2.8201999  |
| C  | -0.6382027 | 4.9971362  | 1.3586299  |
| H  | -1.5498177 | -1.8850888 | -4.4640831 |
| H  | -0.9826467 | -0.0043868 | -5.9508141 |
| H  | -0.4133567 | 2.2344662  | -5.0186541 |
| H  | -1.5129487 | -1.6026468 | -1.9829911 |
| H  | -0.7722287 | 3.6387662  | -2.6121281 |
| H  | -1.5924627 | 3.0292832  | -0.4906571 |
| H  | 0.9231593  | 2.0780102  | 0.6928639  |
| H  | -2.4920297 | 0.6876142  | 0.5313749  |
| H  | 3.4244713  | 1.7578982  | -1.7476511 |
| H  | 1.7651083  | 2.3541242  | -1.9465711 |
| H  | 2.3554183  | 0.9855172  | -2.8981641 |

|   |            |            |            |
|---|------------|------------|------------|
| H | -6.2155307 | -1.1477588 | 1.8608969  |
| H | -4.1314147 | -4.0788848 | -0.4868421 |
| H | -1.9799427 | -3.2723188 | 0.4161949  |
| H | -4.0345247 | -0.3387718 | 2.7742219  |
| H | -1.6680757 | -0.6335638 | 3.0507849  |
| H | -0.8538267 | -2.0737218 | 2.4065939  |
| H | -7.7113377 | -4.2283068 | -0.8853631 |
| H | -6.2440507 | -5.0183848 | -0.2504751 |
| H | -6.1292177 | -3.8878858 | -1.6340141 |
| H | 1.3008733  | 4.6105652  | -0.5555851 |
| H | 2.5042223  | 3.8178182  | 0.4905569  |
| H | 2.0082033  | 5.4866252  | 0.8139699  |
| H | 0.2808953  | 3.5352042  | 3.5097549  |
| H | 1.8828433  | 3.1234462  | 2.8465249  |
| H | 1.4666183  | 4.8126952  | 3.1713659  |
| H | -1.4774997 | 4.6581192  | 1.9725279  |
| H | -0.9843807 | 5.1669142  | 0.3304189  |
| H | -0.3101187 | 5.9664592  | 1.7489969  |
| P | 5.0708423  | -2.4731968 | 0.4917779  |
| C | 4.2723383  | -3.6980548 | 1.5851739  |
| H | 4.9952443  | -4.4364248 | 1.9512479  |
| H | 3.8123793  | -3.1785088 | 2.4317409  |
| H | 3.4738233  | -4.2039898 | 1.0333619  |
| C | 5.8841923  | -3.4854338 | -0.7925181 |
| H | 6.4683373  | -2.8413318 | -1.4565631 |
| H | 6.5464533  | -4.2295348 | -0.3345421 |
| H | 5.1239613  | -3.9973848 | -1.3902011 |

|   |           |            |           |
|---|-----------|------------|-----------|
| C | 6.4621263 | -1.8287058 | 1.4844959 |
| H | 6.0729063 | -1.2832158 | 2.3494819 |
| H | 7.1002193 | -2.6497888 | 1.8319109 |
| H | 7.0585773 | -1.1380608 | 0.8809209 |

**A- int5**

|    |            |            |            |
|----|------------|------------|------------|
| C  | 0.8711191  | -3.3891185 | 0.8210818  |
| C  | -0.2588859 | -3.4836515 | 1.6315148  |
| C  | -1.0743989 | -2.3764765 | 1.8729048  |
| C  | -0.7203799 | -1.1760165 | 1.2787968  |
| C  | 0.4154341  | -1.0726545 | 0.4669678  |
| C  | 1.2120171  | -2.1773335 | 0.2202638  |
| N  | -1.4196619 | 0.0737475  | 1.3769558  |
| C  | -0.4167949 | 1.0106225  | 0.9654138  |
| C  | 0.4136411  | 0.3075465  | -0.1151302 |
| N  | -0.6763339 | 2.3343335  | 0.3388728  |
| C  | 0.9077791  | 2.6390135  | 0.0212748  |
| C  | 1.5974181  | 1.2680525  | -0.1840642 |
| O  | 1.3074761  | 3.7422355  | -0.0646342 |
| N  | 2.1020361  | 1.2272225  | -1.5131492 |
| C  | 1.1771451  | 0.6687105  | -2.3901432 |
| C  | -0.0475199 | 0.3424655  | -1.5896392 |
| O  | 1.4074011  | 0.4894185  | -3.5678472 |
| C  | -1.2642229 | 0.0594025  | -2.1180712 |
| C  | -1.4989909 | 0.1405635  | -3.5988152 |
| Au | -2.9397879 | -0.6442365 | -1.0903652 |
| C  | 6.0356031  | -0.0003685 | 0.5454848  |
| C  | 6.0585031  | -1.3317385 | 0.1182438  |



|   |            |            |            |
|---|------------|------------|------------|
| C | 5.2551281  | -1.7285745 | -0.9565742 |
| C | 4.4445631  | -0.7913325 | -1.5878032 |
| C | 4.4163221  | 0.5399405  | -1.1719082 |
| C | 5.2219591  | 0.9198495  | -0.0949902 |
| C | 3.4920771  | 1.5132775  | -1.8454252 |
| O | 6.8824991  | -2.1526515 | 0.8007318  |
| C | 6.9856341  | -3.4945625 | 0.3813088  |
| C | -1.5003379 | 3.4147015  | 1.0423838  |
| C | -2.9164009 | 2.8680595  | 1.1901848  |
| C | -1.5323559 | 4.6395975  | 0.1363308  |
| C | -0.8806329 | 3.7224745  | 2.3936708  |
| H | 1.4897521  | -4.2669765 | 0.6574538  |
| H | -0.5073439 | -4.4355045 | 2.0942098  |
| H | -1.9430739 | -2.4517805 | 2.5257088  |
| H | 2.0932521  | -2.0871605 | -0.4151302 |
| H | -1.7886899 | 0.2452855  | 2.3079028  |
| H | 0.2655311  | 1.2380875  | 1.8098558  |
| H | -1.1073619 | 2.1327105  | -0.5841882 |
| H | 2.3808361  | 1.1172245  | 0.5757538  |
| H | -1.5583319 | -0.8843225 | -3.9923862 |
| H | -0.7166989 | 0.6574815  | -4.1596982 |
| H | -2.4751209 | 0.5924115  | -3.8091992 |
| H | 6.6749281  | 0.2831965  | 1.3772528  |
| H | 5.2695961  | -2.7533535 | -1.3159892 |
| H | 3.8285831  | -1.0963295 | -2.4352832 |
| H | 5.2226071  | 1.9592055  | 0.2350558  |
| H | 3.7270781  | 2.5487285  | -1.5614622 |

|   |            |            |            |
|---|------------|------------|------------|
| H | 3.5440371  | 1.4446325  | -2.9383512 |
| H | 7.7105801  | -3.9701935 | 1.0437198  |
| H | 7.3444461  | -3.5673305 | -0.6544562 |
| H | 6.0240991  | -4.0203695 | 0.4665568  |
| H | -2.9756749 | 2.0105405  | 1.8666098  |
| H | -3.3356799 | 2.5657775  | 0.2216478  |
| H | -3.5515049 | 3.6607025  | 1.6003328  |
| H | -0.5572199 | 5.1184895  | 0.0367388  |
| H | -1.9063089 | 4.3835695  | -0.8632402 |
| H | -2.2276639 | 5.3685675  | 0.5654608  |
| H | 0.1479921  | 4.0874975  | 2.3058778  |
| H | -0.8994029 | 2.8567325  | 3.0672278  |
| H | -1.4670109 | 4.5135505  | 2.8727168  |
| P | -4.8773459 | -1.6069505 | -0.0888112 |
| C | -5.3020399 | -0.9430545 | 1.5627298  |
| H | -6.1767859 | -1.4558435 | 1.9797058  |
| H | -4.4522369 | -1.0771935 | 2.2405858  |
| H | -5.5182669 | 0.1273015  | 1.4831218  |
| C | -6.4336589 | -1.4456035 | -1.0301312 |
| H | -6.3120889 | -1.9031175 | -2.0167002 |
| H | -7.2593579 | -1.9375145 | -0.5028232 |
| H | -6.6733089 | -0.3873245 | -1.1712682 |
| C | -4.7211819 | -3.4049935 | 0.1941658  |
| H | -3.8387879 | -3.6039275 | 0.8112328  |
| H | -5.6145799 | -3.8030665 | 0.6894398  |
| H | -4.5836419 | -3.9122985 | -0.7657742 |

**A- ts6**

|    |            |            |            |
|----|------------|------------|------------|
| C  | -1.7661072 | -3.2160060 | -0.6788311 |
| C  | -0.6419242 | -3.6426030 | -1.3821301 |
| C  | 0.4178528  | -2.7754090 | -1.6595951 |
| C  | 0.3106498  | -1.4690200 | -1.2135901 |
| C  | -0.8153762 | -1.0374090 | -0.4961491 |
| C  | -1.8579482 | -1.9022540 | -0.2152411 |
| N  | 1.2626328  | -0.4138670 | -1.3865311 |
| C  | 0.4684848  | 0.7737360  | -1.1669831 |
| C  | -0.5102302 | 0.3636610  | -0.0730811 |
| N  | 0.9846088  | 2.0382110  | -0.5922081 |
| C  | -0.3117502 | 2.6880990  | -0.1849741 |
| C  | -1.4054682 | 1.5867400  | -0.0207281 |
| O  | -0.4188032 | 3.8506830  | 0.0530099  |
| N  | -1.9753402 | 1.6196070  | 1.3004209  |
| C  | -1.2326122 | 0.8516770  | 2.1709229  |
| C  | -0.0096772 | 0.4567320  | 1.3771879  |
| O  | -1.5034522 | 0.6096180  | 3.3269079  |
| C  | 1.2607238  | 0.7054860  | 1.7729189  |
| C  | 1.5782688  | 1.1745000  | 3.1688309  |
| Au | 2.9345608  | -0.3809720 | 0.9523849  |
| C  | -5.6923092 | 0.1731820  | -0.7630301 |
| C  | -5.9732072 | -0.9728730 | -0.0112321 |
| C  | -5.4310032 | -1.1101750 | 1.2709579  |
| C  | -4.6101132 | -0.1081540 | 1.7802429  |
| C  | -4.3220202 | 1.0375290  | 1.0385299  |
| C  | -4.8801922 | 1.1641290  | -0.2383511 |
| C  | -3.3479222 | 2.0497190  | 1.5688919  |

|   |            |            |            |
|---|------------|------------|------------|
| O | -6.7766722 | -1.8798030 | -0.6033801 |
| C | -7.1322702 | -3.0324390 | 0.1264159  |
| C | 2.0067718  | 2.9103600  | -1.3039741 |
| C | 3.0773198  | 2.0066190  | -1.9039801 |
| C | 2.6348458  | 3.8113370  | -0.2473331 |
| C | 1.3448278  | 3.7159650  | -2.4156401 |
| H | -2.5786552 | -3.9118950 | -0.4895521 |
| H | -0.5901022 | -4.6698250 | -1.7341511 |
| H | 1.2819608  | -3.1108830 | -2.2313871 |
| H | -2.7314482 | -1.5591960 | 0.3412159  |
| H | 1.7408018  | -0.4434610 | -2.2810391 |
| H | -0.1118302 | 1.0227500  | -2.0787791 |
| H | 1.4411218  | 1.5077310  | 0.5442189  |
| H | -2.1682912 | 1.6509790  | -0.8105811 |
| H | 2.0402958  | 0.3655560  | 3.7490229  |
| H | 0.6957798  | 1.5055090  | 3.7266009  |
| H | 2.3151928  | 1.9858080  | 3.1351409  |
| H | -6.1409672 | 0.2633540  | -1.7487111 |
| H | -5.6513002 | -1.9812380 | 1.8808759  |
| H | -4.1824072 | -0.2181710 | 2.7765089  |
| H | -4.6926012 | 2.0667460  | -0.8216091 |
| H | -3.4921432 | 3.0400120  | 1.1193139  |
| H | -3.4232722 | 2.1557350  | 2.6563339  |
| H | -7.7942592 | -3.6136980 | -0.5173241 |
| H | -7.6656382 | -2.7760830 | 1.0518839  |
| H | -6.2511002 | -3.6403640 | 0.3770639  |
| H | 2.6999878  | 1.4327770  | -2.7600411 |

|             |            |            |            |
|-------------|------------|------------|------------|
| H           | 3.5018318  | 1.3179190  | -1.1609331 |
| H           | 3.8884538  | 2.6392550  | -2.2804421 |
| H           | 1.8918928  | 4.4558150  | 0.2285539  |
| H           | 3.1381718  | 3.2152750  | 0.5257909  |
| H           | 3.3883708  | 4.4509600  | -0.7199151 |
| H           | 0.6461448  | 4.4619500  | -2.0291991 |
| H           | 0.8172318  | 3.0648440  | -3.1250071 |
| H           | 2.1211118  | 4.2455120  | -2.9789941 |
| P           | 4.6934588  | -1.8389840 | 0.3917469  |
| C           | 5.1504908  | -1.7581640 | -1.3746931 |
| H           | 5.9162688  | -2.5054730 | -1.6133321 |
| H           | 4.2605598  | -1.9478780 | -1.9848781 |
| H           | 5.5337138  | -0.7615170 | -1.6156571 |
| C           | 6.2655568  | -1.6262660 | 1.2875229  |
| H           | 6.0946108  | -1.7443210 | 2.3617139  |
| H           | 6.9989608  | -2.3695070 | 0.9537119  |
| H           | 6.6605428  | -0.6215950 | 1.1098439  |
| C           | 4.2333988  | -3.5838000 | 0.6542399  |
| H           | 3.3211578  | -3.8072110 | 0.0910799  |
| H           | 5.0399528  | -4.2504640 | 0.3275309  |
| H           | 4.0298458  | -3.7550960 | 1.7156529  |
| <b>A-2'</b> |            |            |            |
| C           | -0.5524640 | -4.4515512 | -1.3904064 |
| C           | 0.6559970  | -4.4806922 | -2.0841974 |
| C           | 1.4415260  | -3.3333552 | -2.2074684 |
| C           | 0.9659550  | -2.1763062 | -1.6209094 |
| C           | -0.2445740 | -2.1299042 | -0.9152924 |

|    |            |            |            |
|----|------------|------------|------------|
| C  | -1.0060290 | -3.2785612 | -0.7855704 |
| N  | 1.6206670  | -0.8609962 | -1.6442434 |
| C  | 0.4361360  | -0.0061252 | -1.3862934 |
| C  | -0.2914680 | -0.7737992 | -0.2632744 |
| N  | 0.4859210  | 1.3637748  | -0.9649164 |
| C  | -0.7369760 | 1.5744458  | -0.3066344 |
| C  | -1.4189820 | 0.2213808  | 0.0183326  |
| O  | -1.2002840 | 2.6500058  | -0.0044534 |
| N  | -1.6760600 | 0.1726038  | 1.4363516  |
| C  | -0.5578170 | -0.2210152 | 2.1265426  |
| C  | 0.3375000  | -0.8999622 | 1.1346666  |
| O  | -0.3938450 | -0.1053542 | 3.3272406  |
| C  | 1.3073320  | -1.7556622 | 1.5047086  |
| C  | 1.8107230  | -2.0017442 | 2.8849466  |
| Au | 3.2836870  | -0.3824572 | -0.2247214 |
| C  | -5.8001890 | 1.3902978  | -0.1504394 |
| C  | -6.4848180 | 0.1879138  | 0.0551976  |
| C  | -5.9528720 | -0.7729232 | 0.9195506  |
| C  | -4.7497310 | -0.5156792 | 1.5692816  |
| C  | -4.0647720 | 0.6824908  | 1.3818106  |
| C  | -4.6051170 | 1.6300258  | 0.5060536  |
| C  | -2.7551240 | 0.9326318  | 2.0681216  |
| O  | -7.6437100 | 0.0491518  | -0.6242754 |
| C  | -8.3979490 | -1.1227932 | -0.4196874 |
| C  | 1.0513630  | 2.4830048  | -1.7978374 |
| C  | 2.2003320  | 1.9678068  | -2.6551914 |
| C  | 1.5842670  | 3.5441348  | -0.8423924 |

|   |            |            |            |
|---|------------|------------|------------|
| C | -0.0203510 | 3.0561848  | -2.7247724 |
| H | -1.1457200 | -5.3586882 | -1.3135264 |
| H | 0.9922610  | -5.4078002 | -2.5401494 |
| H | 2.3852320  | -3.3515812 | -2.7495724 |
| H | -1.9368620 | -3.2608842 | -0.2226534 |
| H | 2.0068300  | -0.6868572 | -2.5718044 |
| H | -0.1934880 | -0.1062672 | -2.2941874 |
| H | -2.3359160 | 0.1023928  | -0.5747064 |
| H | 1.3877110  | -2.9399502 | 3.2688786  |
| H | 1.5350790  | -1.2056762 | 3.5772846  |
| H | 2.8983420  | -2.1455442 | 2.8701266  |
| H | -6.2375120 | 2.1208058  | -0.8260354 |
| H | -6.4702420 | -1.7104612 | 1.0999276  |
| H | -4.3391470 | -1.2627432 | 2.2489926  |
| H | -4.0727310 | 2.5668538  | 0.3433666  |
| H | -2.5079460 | 2.0026928  | 2.0553076  |
| H | -2.7655660 | 0.6061638  | 3.1145256  |
| H | -9.2929010 | -1.0266812 | -1.0367554 |
| H | -8.6977070 | -1.2323102 | 0.6318266  |
| H | -7.8445970 | -2.0207872 | -0.7295124 |
| H | 1.8654390  | 1.2524938  | -3.4191254 |
| H | 3.0050020  | 1.5215298  | -2.0520764 |
| H | 2.6349560  | 2.8143858  | -3.1974064 |
| H | 0.7887890  | 3.9360148  | -0.2044454 |
| H | 2.3686930  | 3.1169088  | -0.2032814 |
| H | 2.0152520  | 4.3743298  | -1.4141454 |
| H | -0.8384690 | 3.5131278  | -2.1635944 |

|   |            |            |            |
|---|------------|------------|------------|
| H | -0.4319910 | 2.2771728  | -3.3804944 |
| H | 0.4240710  | 3.8253448  | -3.3663534 |
| P | 5.1208310  | 0.3112328  | 1.0150006  |
| C | 5.2663700  | 2.1265388  | 1.0117426  |
| H | 6.1611000  | 2.4333468  | 1.5660226  |
| H | 5.3338060  | 2.4935518  | -0.0174914 |
| H | 4.3823000  | 2.5671558  | 1.4836556  |
| C | 5.0883700  | -0.1524152 | 2.7742746  |
| H | 5.1422500  | -1.2408492 | 2.8758496  |
| H | 5.9446360  | 0.2974348  | 3.2904926  |
| H | 4.1602850  | 0.1985468  | 3.2366316  |
| C | 6.7164060  | -0.2996412 | 0.3871936  |
| H | 6.8574680  | 0.0276898  | -0.6472014 |
| H | 7.5346100  | 0.0887698  | 1.0048796  |
| H | 6.7331710  | -1.3932492 | 0.4123656  |
| H | 1.7332630  | -2.4090732 | 0.7363466  |

**B-1**

|   |           |            |            |
|---|-----------|------------|------------|
| C | 4.4048880 | -2.2713760 | 0.5139559  |
| C | 3.8707580 | -3.3120000 | -0.2652061 |
| C | 2.7150490 | -3.1328960 | -1.0071741 |
| C | 2.0985050 | -1.8839180 | -0.9458131 |
| C | 2.6075210 | -0.8283760 | -0.1482731 |
| C | 3.7882240 | -1.0336440 | 0.5807039  |
| N | 0.9622050 | -1.4253030 | -1.5774861 |
| C | 0.7221080 | -0.1428120 | -1.1769851 |
| C | 1.6976890 | 0.2726480  | -0.3072151 |
| O | 3.5111410 | 2.1596790  | 1.8325369  |



|   |            |            |            |
|---|------------|------------|------------|
| C | 3.0292440  | 2.1566840  | 0.7081449  |
| C | 1.6432580  | 1.5780850  | 0.4209769  |
| N | 3.7411050  | 2.6843840  | -0.3314481 |
| N | 0.8283530  | 1.5261640  | 1.6498999  |
| C | -0.4097610 | 2.0730430  | 1.7033669  |
| C | -0.9620700 | 2.5734340  | 0.4211569  |
| C | -1.4678200 | 2.8462200  | -0.6675801 |
| C | -1.8382730 | 3.1481600  | -2.0448741 |
| O | -1.1354930 | 2.0833240  | 2.6916809  |
| C | 3.6076750  | 2.7948380  | -1.8026051 |
| C | 4.5456810  | 3.9366560  | -2.1927021 |
| C | 4.0649630  | 1.5076280  | -2.4857641 |
| C | 2.1953370  | 3.1633800  | -2.2505271 |
| C | -0.7265080 | -2.4072610 | 1.3316579  |
| C | 0.0719780  | -3.4631160 | 1.7682029  |
| C | 1.1679730  | -3.2015620 | 2.5952229  |
| C | 1.4948270  | -1.8949530 | 2.9210939  |
| C | 0.7249670  | -0.8202210 | 2.4666959  |
| C | -0.4005300 | -1.1067300 | 1.7034089  |
| C | 1.1717200  | 0.5985450  | 2.7428399  |
| O | -0.1251750 | -4.7606060 | 1.4211269  |
| C | -1.1342270 | -5.0240350 | 0.4769009  |
| H | 5.3179580  | -2.4463520 | 1.0787939  |
| H | 4.3753300  | -4.2752090 | -0.2876731 |
| H | 2.2990780  | -3.9353240 | -1.6125991 |
| H | 4.2002230  | -0.2386660 | 1.2015729  |
| H | 0.2733710  | -1.9834120 | -2.0698141 |

|    |            |            |            |
|----|------------|------------|------------|
| H  | -0.1601260 | 0.3795840  | -1.5243001 |
| H  | 1.1354480  | 2.2999040  | -0.2245131 |
| H  | 4.6564950  | 2.9532020  | 0.0150239  |
| H  | -2.7146630 | 3.8010840  | -2.0960671 |
| H  | -2.0670170 | 2.2102680  | -2.5689741 |
| H  | -1.0006910 | 3.6362060  | -2.5558621 |
| H  | 4.2362720  | 4.8773470  | -1.7217381 |
| H  | 4.5444650  | 4.0738310  | -3.2795991 |
| H  | 5.5780570  | 3.7187360  | -1.8889661 |
| H  | 3.4050120  | 0.6692320  | -2.2406401 |
| H  | 4.0682540  | 1.6394940  | -3.5751991 |
| H  | 5.0814920  | 1.2454810  | -2.1683151 |
| H  | 2.2277500  | 3.4652150  | -3.3041631 |
| H  | 1.8042020  | 4.0085350  | -1.6680011 |
| H  | 1.5059080  | 2.3140510  | -2.1854151 |
| H  | -1.5592440 | -2.5597140 | 0.6496849  |
| H  | 1.7821860  | -4.0379380 | 2.9194439  |
| H  | 2.3940380  | -1.7008770 | 3.5059639  |
| H  | -1.0188030 | -0.3082490 | 1.3024659  |
| H  | 0.7018260  | 1.0039460  | 3.6452299  |
| H  | 2.2540530  | 0.6502620  | 2.8843859  |
| H  | -1.0931660 | -6.0949020 | 0.2659079  |
| H  | -0.9785920 | -4.4622310 | -0.4563421 |
| H  | -2.1333920 | -4.7750180 | 0.8646029  |
| Au | -3.2166050 | 1.7990590  | 0.5451949  |
| P  | -4.9996270 | 0.5345530  | 1.3194519  |
| C  | -4.3756120 | -1.0880740 | 1.8561699  |

|        |            |            |            |
|--------|------------|------------|------------|
| H      | -3.5303840 | -0.9576960 | 2.5402249  |
| H      | -5.1749420 | -1.6539130 | 2.3494039  |
| H      | -4.0353920 | -1.6298880 | 0.9672079  |
| C      | -6.3041010 | 0.1611270  | 0.1101539  |
| H      | -7.0709540 | -0.4676790 | 0.5775149  |
| H      | -6.7554450 | 1.0877000  | -0.2555041 |
| H      | -5.8482880 | -0.3656610 | -0.7326611 |
| C      | -5.8459820 | 1.2384140  | 2.7722139  |
| H      | -6.6182780 | 0.5492990  | 3.1338089  |
| H      | -5.1116650 | 1.4130250  | 3.5645929  |
| H      | -6.3062000 | 2.1950360  | 2.5077729  |
| Sb     | -2.9310250 | -1.0670330 | -2.1660471 |
| F      | -4.0711080 | 0.2985470  | -2.0801721 |
| F      | -1.7770500 | 0.0090370  | -2.9899161 |
| F      | -2.2304360 | -0.5252520 | -0.6039391 |
| F      | -1.7136820 | -2.3641660 | -2.1671591 |
| F      | -3.6023290 | -1.6332460 | -3.6793601 |
| F      | -4.0619330 | -2.0557350 | -1.2197651 |
| B- ts1 |            |            |            |
| C      | 2.4651196  | 0.2747779  | 4.7314709  |
| C      | 1.6450306  | -0.3904661 | 5.6635329  |
| C      | 0.5791176  | -1.1769061 | 5.2433539  |
| C      | 0.3623606  | -1.2751791 | 3.8717849  |
| C      | 1.1606306  | -0.6150611 | 2.9259569  |
| C      | 2.2310006  | 0.1711499  | 3.3658949  |
| N      | -0.6113184 | -1.9879601 | 3.1636489  |
| C      | -0.4313394 | -1.8188621 | 1.8380069  |

|    |            |            |            |
|----|------------|------------|------------|
| C  | 0.6131976  | -0.9258491 | 1.6019379  |
| C  | 1.4159776  | -0.8414021 | 0.3202629  |
| N  | 0.8658896  | 0.1420769  | -0.6127321 |
| C  | -0.1560584 | 0.9393939  | -0.2661621 |
| C  | -0.7426404 | 0.7731379  | 1.0790589  |
| O  | -0.6026034 | 1.8399199  | -0.9976771 |
| C  | 1.5660696  | -2.2228641 | -0.3482841 |
| O  | 2.6143466  | -2.8503081 | -0.1483631 |
| N  | 0.5387866  | -2.6605761 | -1.1034271 |
| C  | -1.5725084 | 1.2546339  | 1.9056739  |
| Au | -2.9595884 | 2.4236839  | 0.5906459  |
| C  | -2.0265584 | 1.1252879  | 3.3289299  |
| C  | 0.4850996  | -3.9750251 | -1.8108841 |
| C  | -0.8752124 | -4.0233351 | -2.5280411 |
| C  | 1.6254766  | -4.0654351 | -2.8447791 |
| C  | 0.5785926  | -5.1294841 | -0.7938331 |
| C  | 3.9719386  | 3.3440259  | -1.2604061 |
| C  | 5.2163006  | 2.7048759  | -1.2291571 |
| C  | 5.2946196  | 1.3270269  | -1.4064681 |
| C  | 4.1212026  | 0.5930399  | -1.6142351 |
| C  | 2.8753106  | 1.2117169  | -1.6445971 |
| C  | 2.8184336  | 2.6043209  | -1.4670841 |
| C  | 1.6057226  | 0.4099939  | -1.8674821 |
| O  | 6.3039676  | 3.5228589  | -1.0198501 |
| C  | 7.6380166  | 2.9969139  | -0.9948401 |
| H  | 3.2840126  | 0.8689829  | 5.0855349  |
| H  | 1.8508456  | -0.2922591 | 6.7109609  |

|   |            |            |            |
|---|------------|------------|------------|
| H | -0.0433804 | -1.6896311 | 5.9501069  |
| H | 2.8631106  | 0.6865289  | 2.6699269  |
| H | -1.3375424 | -2.5375451 | 3.5621009  |
| H | -1.0360414 | -2.3399051 | 1.1359559  |
| H | 2.4261236  | -0.5580681 | 0.5739419  |
| H | -0.2513384 | -2.0591451 | -1.2157151 |
| H | -2.7745344 | 0.3438949  | 3.3757909  |
| H | -1.2049864 | 0.8750049  | 3.9833279  |
| H | -2.4767734 | 2.0428459  | 3.6769779  |
| H | -1.6950634 | -3.9968011 | -1.8230981 |
| H | -0.9553404 | -4.9412031 | -3.0969831 |
| H | -0.9883574 | -3.1923891 | -3.2158481 |
| H | 2.5924516  | -4.0182311 | -2.3659401 |
| H | 1.5554056  | -5.0033821 | -3.3850331 |
| H | 1.5494816  | -3.2571621 | -3.5649661 |
| H | 1.5196086  | -5.1091121 | -0.2640361 |
| H | 0.4951376  | -6.0792791 | -1.3111811 |
| H | -0.2321254 | -5.0670141 | -0.0763751 |
| H | 3.9392266  | 4.4062399  | -1.1288961 |
| H | 6.2351976  | 0.8161039  | -1.3888771 |
| H | 4.1957316  | -0.4695581 | -1.7479781 |
| H | 1.8686346  | 3.1017839  | -1.4963881 |
| H | 0.9310926  | 0.9335289  | -2.5234821 |
| H | 1.8387616  | -0.5407001 | -2.3225301 |
| H | 8.2798586  | 3.8450809  | -0.8273741 |
| H | 7.8892676  | 2.5302249  | -1.9399081 |
| H | 7.7595806  | 2.2829679  | -0.1888201 |

|    |            |            |            |
|----|------------|------------|------------|
| P  | -4.7302354 | 3.3394509  | -0.8019201 |
| C  | -4.5041094 | 2.8442329  | -2.5851571 |
| H  | -4.5264594 | 1.7670549  | -2.6466581 |
| H  | -5.2947074 | 3.2614869  | -3.1964921 |
| H  | -3.5465844 | 3.1947539  | -2.9424541 |
| C  | -4.8854854 | 5.1998469  | -0.8412301 |
| H  | -5.6802324 | 5.4995969  | -1.5127381 |
| H  | -5.1013794 | 5.5712199  | 0.1509139  |
| H  | -3.9548814 | 5.6351899  | -1.1774031 |
| C  | -6.4379944 | 2.7334659  | -0.3630701 |
| H  | -7.1698834 | 3.1398909  | -1.0499601 |
| H  | -6.4482734 | 1.6558929  | -0.4225501 |
| H  | -6.6893274 | 3.0338989  | 0.6444129  |
| Sb | -3.9971474 | -1.7518081 | -0.2670031 |
| F  | -4.6582534 | -0.1300351 | -0.9810001 |
| F  | -4.2136124 | -2.6163331 | -1.9158381 |
| F  | -5.7127964 | -2.2557671 | 0.2923889  |
| F  | -3.7083864 | -0.8711861 | 1.3852619  |
| F  | -2.2337324 | -1.2480261 | -0.7856871 |
| F  | -3.1989474 | -3.2847531 | 0.5031299  |

**B-int1**

|   |            |           |            |
|---|------------|-----------|------------|
| C | 0.1964092  | 3.5160819 | -0.1766691 |
| C | -0.9882468 | 3.6979079 | 0.5380719  |
| C | -1.6950168 | 2.6134229 | 1.0582299  |
| C | -1.1399318 | 1.3698299 | 0.8238869  |
| C | 0.0303812  | 1.1567009 | 0.1015529  |
| C | 0.7178042  | 2.2413829 | -0.4116011 |

|    |            |            |            |
|----|------------|------------|------------|
| N  | -1.6410498 | 0.1031639  | 1.2177989  |
| C  | -0.8960398 | -0.8576011 | 0.7830409  |
| C  | 0.3076002  | -0.3311601 | 0.0605199  |
| C  | 1.6384742  | -0.6710131 | 0.8215739  |
| N  | 2.6083422  | -0.8151001 | -0.2286161 |
| C  | 2.0400362  | -0.9905391 | -1.4875931 |
| C  | 0.5645532  | -0.9161131 | -1.3248921 |
| O  | 2.7126252  | -1.1265711 | -2.4955081 |
| C  | 1.4686182  | -1.9096411 | 1.7091489  |
| O  | 0.6288542  | -1.8737021 | 2.6052609  |
| N  | 2.2636512  | -2.9532251 | 1.4206029  |
| C  | -0.3775078 | -1.1690611 | -2.2613341 |
| Au | -2.4009768 | -0.7082311 | -2.1369131 |
| C  | 0.0019642  | -1.7389781 | -3.5966861 |
| C  | 2.2175112  | -4.2682791 | 2.0950349  |
| C  | 3.2728432  | -5.1327521 | 1.4194809  |
| C  | 2.5472252  | -4.0984981 | 3.5741099  |
| C  | 0.8356462  | -4.8906701 | 1.9140649  |
| C  | 4.1356712  | 3.1266529  | -1.4741511 |
| C  | 4.0641552  | 3.9041599  | -0.3111761 |
| C  | 4.0529352  | 3.2836949  | 0.9375849  |
| C  | 4.0853482  | 1.8918349  | 1.0081589  |
| C  | 4.1233162  | 1.1067089  | -0.1396831 |
| C  | 4.1617062  | 1.7462579  | -1.3864041 |
| C  | 3.9974752  | -0.3886881 | -0.0703951 |
| O  | 4.0058002  | 5.2432639  | -0.5028521 |
| C  | 3.8796252  | 6.0632909  | 0.6340859  |

|   |            |            |            |
|---|------------|------------|------------|
| H | 0.7250782  | 4.3809559  | -0.5734681 |
| H | -1.3766308 | 4.7018459  | 0.6880289  |
| H | -2.6339058 | 2.7308049  | 1.5936629  |
| H | 1.6368962  | 2.1136549  | -0.9812151 |
| H | -2.5147048 | 0.0166189  | 1.7582119  |
| H | -1.1565738 | -1.8992991 | 0.9304109  |
| H | 1.8940912  | 0.1594029  | 1.4970129  |
| H | 2.8361722  | -2.8553311 | 0.5893999  |
| H | 1.0534692  | -2.0254561 | -3.6809401 |
| H | -0.6378848 | -2.6002771 | -3.8274931 |
| H | -0.2129438 | -0.9962691 | -4.3777441 |
| H | 3.0555962  | -5.2641341 | 0.3514609  |
| H | 3.2941242  | -6.1256181 | 1.8814559  |
| H | 4.2717492  | -4.6904061 | 1.5232199  |
| H | 1.8147092  | -3.4514731 | 4.0649869  |
| H | 2.5383832  | -5.0766351 | 4.0697219  |
| H | 3.5447602  | -3.6602531 | 3.6981289  |
| H | 0.0668292  | -4.2743341 | 2.3897489  |
| H | 0.8116112  | -5.8868661 | 2.3717569  |
| H | 0.5978552  | -4.9980651 | 0.8483749  |
| H | 4.1601842  | 3.6378949  | -2.4332161 |
| H | 4.0128612  | 3.8652329  | 1.8535699  |
| H | 4.0767912  | 1.4120359  | 1.9876169  |
| H | 4.1843322  | 1.1396479  | -2.2909961 |
| H | 4.5568682  | -0.8707691 | -0.8803471 |
| H | 4.3716632  | -0.7778721 | 0.8870519  |
| H | 3.8231632  | 7.0913489  | 0.2713139  |



|              |            |            |            |
|--------------|------------|------------|------------|
| H            | 4.7464682  | 5.9679299  | 1.3032749  |
| H            | 2.9655012  | 5.8299179  | 1.1995489  |
| P            | -4.7211898 | -0.1544021 | -2.3926511 |
| C            | -5.9561538 | -1.1488571 | -1.4863101 |
| H            | -5.7684128 | -1.1329981 | -0.4119091 |
| H            | -6.9622048 | -0.7576581 | -1.6779431 |
| H            | -5.8922618 | -2.1816041 | -1.8450741 |
| C            | -5.2126508 | -0.4468541 | -4.1367071 |
| H            | -6.2687398 | -0.1940151 | -4.2914111 |
| H            | -4.5946408 | 0.1667739  | -4.8003171 |
| H            | -5.0531318 | -1.4990371 | -4.3938741 |
| C            | -5.1821018 | 1.5992319  | -2.1666041 |
| H            | -6.2580548 | 1.7274649  | -2.3334161 |
| H            | -4.9344768 | 1.9244249  | -1.1561941 |
| H            | -4.6233878 | 2.1999609  | -2.8918391 |
| Sb           | -5.2770498 | 0.8813129  | 1.8186279  |
| F            | -6.2188508 | 1.2008359  | 3.2570999  |
| F            | -4.8212468 | 2.5867739  | 1.6632649  |
| F            | -3.7816018 | 0.6146729  | 2.7943779  |
| F            | -4.1814238 | 0.5332149  | 0.4267169  |
| F            | -6.6103668 | 1.1145809  | 0.6899869  |
| F            | -5.6083668 | -0.8525841 | 1.9039059  |
| <b>B-ts2</b> |            |            |            |
| C            | 1.0099721  | -3.1634729 | 2.2063097  |
| C            | -0.0947029 | -3.0591489 | 3.0499367  |
| C            | -0.9918679 | -1.9956529 | 2.9363227  |
| C            | -0.7317949 | -1.0653679 | 1.9470197  |

|    |            |            |            |
|----|------------|------------|------------|
| C  | 0.3656571  | -1.1516739 | 1.0956507  |
| C  | 1.2530041  | -2.2043239 | 1.2205437  |
| N  | -1.4990109 | 0.0598081  | 1.5635117  |
| C  | -0.9285269 | 0.7129971  | 0.5694477  |
| C  | 0.3301111  | 0.0010071  | 0.1218117  |
| N  | 0.0954661  | 2.5127681  | 1.3130247  |
| C  | 1.4448161  | 2.0475621  | 1.1524887  |
| C  | 1.6075641  | 0.8622931  | 0.2100127  |
| O  | 2.3634201  | 2.4811601  | 1.8054127  |
| N  | 1.8970421  | 1.2494331  | -1.1461733 |
| C  | 1.2565511  | 0.4311261  | -2.0802063 |
| C  | 0.2109681  | -0.3400619 | -1.3680533 |
| O  | 1.5714151  | 0.4222981  | -3.2576503 |
| C  | -0.7598889 | -1.1157889 | -1.9056983 |
| C  | -0.8399579 | -1.3523109 | -3.3832833 |
| Au | -2.3641229 | -1.9318009 | -0.8641793 |
| C  | 6.0985611  | 0.2929191  | 0.4300427  |
| C  | 6.4257671  | -0.7839449 | -0.3982743 |
| C  | 5.7050431  | -0.9981119 | -1.5752443 |
| C  | 4.6717391  | -0.1293059 | -1.9146603 |
| C  | 4.3434461  | 0.9546171  | -1.1014823 |
| C  | 5.0669301  | 1.1481911  | 0.0796167  |
| C  | 3.1892651  | 1.8497481  | -1.4626123 |
| O  | 7.4507631  | -1.5639209 | 0.0254387  |
| C  | 7.8258591  | -2.6513329 | -0.7827063 |
| C  | -0.3410179 | 3.8014641  | 0.6340507  |
| C  | -1.7645999 | 4.0561461  | 1.1123437  |

|   |            |            |            |
|---|------------|------------|------------|
| C | -0.2878369 | 3.6653401  | -0.8791253 |
| C | 0.5728571  | 4.9366821  | 1.0858567  |
| H | 1.6886291  | -4.0053289 | 2.3149917  |
| H | -0.2601059 | -3.8154179 | 3.8130937  |
| H | -1.8504889 | -1.9020929 | 3.5973447  |
| H | 2.1064851  | -2.2902389 | 0.5488917  |
| H | -2.4981559 | 0.1946951  | 1.7346277  |
| H | -1.5404439 | 1.3483841  | -0.0649073 |
| H | 2.4443611  | 0.2734191  | 0.6268177  |
| H | -0.8385239 | -2.4327429 | -3.5795703 |
| H | -0.0410729 | -0.8774109 | -3.9578053 |
| H | -1.8129519 | -0.9924999 | -3.7460863 |
| H | 6.6708521  | 0.4327911  | 1.3435697  |
| H | 5.9423111  | -1.8277829 | -2.2347763 |
| H | 4.1049811  | -0.2923599 | -2.8309443 |
| H | 4.8012311  | 1.9745451  | 0.7387627  |
| H | 3.2688931  | 2.8138171  | -0.9397683 |
| H | 3.1602331  | 2.0474471  | -2.5398653 |
| H | 8.6622161  | -3.1400339 | -0.2786753 |
| H | 8.1517561  | -2.3241879 | -1.7805603 |
| H | 7.0064071  | -3.3756179 | -0.8985713 |
| H | -1.7996729 | 4.1645311  | 2.2047697  |
| H | -2.4639299 | 3.2709181  | 0.8089407  |
| H | -2.1307449 | 4.9936241  | 0.6792867  |
| H | 0.7252721  | 3.4447401  | -1.2348193 |
| H | -0.9744099 | 2.9047801  | -1.2650973 |
| H | -0.5960239 | 4.6206441  | -1.3187793 |

|               |            |            |            |
|---------------|------------|------------|------------|
| H             | 1.6050581  | 4.7901021  | 0.7490287  |
| H             | 0.5854001  | 5.0310551  | 2.1790207  |
| H             | 0.2093811  | 5.8827951  | 0.6679617  |
| P             | -4.3335419 | -2.8443129 | 0.1280927  |
| C             | -4.9362769 | -2.1356939 | 1.7028767  |
| H             | -5.7871269 | -2.7200239 | 2.0735957  |
| H             | -4.1366829 | -2.1517559 | 2.4516197  |
| H             | -5.2495889 | -1.1022209 | 1.5298237  |
| C             | -5.8114469 | -2.7290419 | -0.9367643 |
| H             | -5.5958049 | -3.1537319 | -1.9217223 |
| H             | -6.6559509 | -3.2590369 | -0.4803043 |
| H             | -6.0583969 | -1.6700309 | -1.0591953 |
| C             | -4.1836599 | -4.6289599 | 0.5117977  |
| H             | -3.3742599 | -4.7717709 | 1.2361637  |
| H             | -5.1183969 | -5.0277819 | 0.9241387  |
| H             | -3.9246589 | -5.1776229 | -0.3992053 |
| H             | -0.0144059 | 2.6851681  | 2.3154187  |
| Sb            | -4.7977909 | 1.4287521  | -0.5839513 |
| F             | -3.9348419 | 0.6227821  | 0.7994657  |
| F             | -4.4545069 | 0.0197541  | -1.6098653 |
| F             | -6.2572569 | 0.5995711  | -0.0199933 |
| F             | -5.6109999 | 2.2519431  | -1.8960743 |
| F             | -3.1913269 | 2.0739551  | -1.0366263 |
| F             | -5.0529139 | 2.7981461  | 0.4943357  |
| <b>B-int3</b> |            |            |            |
| C             | -0.5254100 | 3.3757073  | 1.8545258  |
| C             | 0.4697800  | 3.1642503  | 2.8085238  |

|    |            |            |            |
|----|------------|------------|------------|
| C  | 1.1359250  | 1.9423473  | 2.8988208  |
| C  | 0.7908150  | 0.9457973  | 1.9946538  |
| C  | -0.1971830 | 1.1513983  | 1.0354618  |
| C  | -0.8680610 | 2.3609823  | 0.9618548  |
| N  | 1.3524380  | -0.3476277 | 1.9029438  |
| C  | 0.7528450  | -1.0117147 | 0.7781298  |
| C  | -0.3397820 | -0.0689617 | 0.1677968  |
| N  | 0.0223840  | -2.2581297 | 1.3082948  |
| C  | -1.4632680 | -1.9263547 | 1.2939478  |
| C  | -1.6897200 | -0.7818027 | 0.3510758  |
| O  | -2.2289860 | -2.5317747 | 1.9771288  |
| N  | -1.9967860 | -1.3322357 | -0.9435762 |
| C  | -1.2726400 | -0.6989347 | -1.9734412 |
| C  | -0.2147450 | 0.1068573  | -1.3382522 |
| O  | -1.5656290 | -0.8671007 | -3.1438962 |
| C  | 0.7641870  | 0.8173923  | -1.9484242 |
| C  | 0.8968970  | 0.8619043  | -3.4379252 |
| Au | 2.2779360  | 1.7925673  | -0.9147122 |
| C  | -6.2548410 | -0.1823477 | 0.3980038  |
| C  | -6.5066410 | 0.8290383  | -0.5330082 |
| C  | -5.7179160 | 0.9271133  | -1.6817972 |
| C  | -4.6919190 | 0.0109433  | -1.8890362 |
| C  | -4.4368630 | -1.0074717 | -0.9716712 |
| C  | -5.2283600 | -1.0865167 | 0.1776078  |
| C  | -3.2900500 | -1.9514787 | -1.2022872 |
| O  | -7.5313850 | 1.6628223  | -0.2328182 |
| C  | -7.8303230 | 2.6923663  | -1.1431302 |

|   |            |            |            |
|---|------------|------------|------------|
| C | 0.4791110  | -3.6460067 | 0.7334848  |
| C | 1.9208930  | -3.8148217 | 1.1868148  |
| C | 0.3449020  | -3.6444047 | -0.7761872 |
| C | -0.3958990 | -4.7201797 | 1.3593968  |
| H | -1.0335310 | 4.3352013  | 1.8062198  |
| H | 0.7240280  | 3.9606453  | 3.5048158  |
| H | 1.8953180  | 1.7671093  | 3.6584548  |
| H | -1.6237980 | 2.5191723  | 0.1931248  |
| H | 2.3707870  | -0.3596617 | 1.8310428  |
| H | 1.4926080  | -1.3376017 | 0.0422348  |
| H | -2.4959330 | -0.1391037 | 0.7428048  |
| H | 0.9193370  | 1.9063273  | -3.7758382 |
| H | 0.1173080  | 0.3193223  | -3.9790992 |
| H | 1.8809860  | 0.4511263  | -3.7062472 |
| H | -6.8812790 | -0.2335477 | 1.2848348  |
| H | -5.8965730 | 1.7039783  | -2.4192662 |
| H | -4.0733750 | 0.0821533  | -2.7835112 |
| H | -5.0316500 | -1.8702067 | 0.9099148  |
| H | -3.3926370 | -2.8488517 | -0.5730992 |
| H | -3.2444330 | -2.2758637 | -2.2485852 |
| H | -8.6777300 | 3.2399393  | -0.7257962 |
| H | -8.1116930 | 2.2948903  | -2.1288042 |
| H | -6.9845540 | 3.3837953  | -1.2681622 |
| H | 2.0004110  | -3.7982637 | 2.2820228  |
| H | 2.6073480  | -3.0794577 | 0.7625468  |
| H | 2.2737080  | -4.7949467 | 0.8483178  |
| H | -0.6914590 | -3.4781537 | -1.0930372 |

|    |            |            |            |
|----|------------|------------|------------|
| H  | 0.9991660  | -2.9131847 | -1.2616382 |
| H  | 0.6533550  | -4.6332607 | -1.1333072 |
| H  | -1.4316910 | -4.6792437 | 1.0100218  |
| H  | -0.3975510 | -4.6686017 | 2.4546458  |
| H  | 0.0180840  | -5.6922087 | 1.0706228  |
| P  | 4.1335490  | 2.8446453  | 0.1408888  |
| C  | 4.7427910  | 2.1140563  | 1.7027088  |
| H  | 5.5392890  | 2.7382323  | 2.1256068  |
| H  | 3.9179380  | 2.0394423  | 2.4201148  |
| H  | 5.1279140  | 1.1121213  | 1.4933778  |
| C  | 5.6401910  | 2.8570853  | -0.8908042 |
| H  | 5.4258340  | 3.3185993  | -1.8594042 |
| H  | 6.4516080  | 3.3996923  | -0.3910422 |
| H  | 5.9375130  | 1.8166953  | -1.0590072 |
| C  | 3.8532130  | 4.5986713  | 0.5875638  |
| H  | 3.0171530  | 4.6507383  | 1.2945698  |
| H  | 4.7469210  | 5.0438463  | 1.0415418  |
| H  | 3.5780930  | 5.1652033  | -0.3075972 |
| H  | 0.2678040  | -2.2916787 | 2.3072538  |
| Sb | 4.7048950  | -1.3516007 | -0.7429802 |
| F  | 3.7673460  | -0.5280277 | 0.5734118  |
| F  | 4.4374750  | 0.0118823  | -1.8437142 |
| F  | 6.1314730  | -0.5129807 | -0.1121032 |
| F  | 5.5864740  | -2.2237107 | -1.9798492 |
| F  | 3.1263370  | -2.0286747 | -1.2447612 |
| F  | 4.9199250  | -2.6993667 | 0.3806898  |

**B-ts3**

|    |            |            |            |
|----|------------|------------|------------|
| C  | 0.3881915  | -3.0704225 | 2.1407193  |
| C  | -0.5643805 | -2.6770265 | 3.0822543  |
| C  | -1.1674565 | -1.4232245 | 3.0076703  |
| C  | -0.7982875 | -0.5981685 | 1.9565883  |
| C  | 0.1436925  | -0.9758925 | 1.0089523  |
| C  | 0.7532665  | -2.2190135 | 1.1009363  |
| N  | -1.3088905 | 0.7152955  | 1.6912963  |
| C  | -0.6965715 | 1.1660645  | 0.4072473  |
| C  | 0.3443645  | 0.1005395  | -0.0225787 |
| N  | 0.0334665  | 2.3480685  | 0.9780523  |
| C  | 1.4716615  | 2.0786145  | 0.8994553  |
| C  | 1.6996845  | 0.8105155  | 0.1090023  |
| O  | 2.3089415  | 2.7921165  | 1.3760173  |
| N  | 2.0354855  | 1.1910155  | -1.2428457 |
| C  | 1.3457195  | 0.4207205  | -2.1940727 |
| C  | 0.2526635  | -0.2815755 | -1.4891867 |
| O  | 1.6755215  | 0.4045385  | -3.3667657 |
| C  | -0.7224225 | -1.0536105 | -2.0225867 |
| C  | -0.7999385 | -1.3196615 | -3.4937817 |
| Au | -2.2737995 | -1.8721755 | -0.9095107 |
| C  | 6.2258285  | 0.2665805  | 0.4365263  |
| C  | 6.5247615  | -0.8708845 | -0.3180767 |
| C  | 5.7926725  | -1.1488445 | -1.4746227 |
| C  | 4.7750195  | -0.2838005 | -1.8660967 |
| C  | 4.4746215  | 0.8593255  | -1.1271997 |
| C  | 5.2098895  | 1.1178365  | 0.0335143  |
| C  | 3.3443645  | 1.7568795  | -1.5490627 |



|   |            |            |            |
|---|------------|------------|------------|
| O | 7.5364105  | -1.6406765 | 0.1533893  |
| C | 7.8851015  | -2.7888625 | -0.5789117 |
| C | -0.4876565 | 3.7524135  | 0.6361213  |
| C | -1.9596905 | 3.8026045  | 1.0193063  |
| C | -0.2909745 | 3.9698065  | -0.8556597 |
| C | 0.2720565  | 4.7862985  | 1.4562203  |
| H | 0.8470075  | -4.0526365 | 2.2193043  |
| H | -0.8343995 | -3.3524625 | 3.8904723  |
| H | -1.9006195 | -1.1006615 | 3.7439523  |
| H | 1.4774155  | -2.5253085 | 0.3477773  |
| H | -2.3364915 | 0.7521325  | 1.6437223  |
| H | -1.4420405 | 1.4193235  | -0.3517127 |
| H | 2.4899985  | 0.2043335  | 0.5822763  |
| H | -0.7969665 | -2.4033675 | -3.6716937 |
| H | -0.0010285 | -0.8537115 | -4.0765917 |
| H | -1.7736705 | -0.9691905 | -3.8633817 |
| H | 6.8086725  | 0.4566975  | 1.3342163  |
| H | 6.0089675  | -2.0259375 | -2.0774977 |
| H | 4.2008935  | -0.4941455 | -2.7683937 |
| H | 4.9728275  | 1.9993165  | 0.6293863  |
| H | 3.4324495  | 2.7388515  | -1.0644667 |
| H | 3.3411865  | 1.9093215  | -2.6341787 |
| H | 8.7137925  | -3.2586825 | -0.0451427 |
| H | 8.2127895  | -2.5381525 | -1.5980657 |
| H | 7.0504425  | -3.5022245 | -0.6412397 |
| H | -2.0984055 | 3.6408725  | 2.0961243  |
| H | -2.5870545 | 3.1058485  | 0.4603543  |

|    |            |            |            |
|----|------------|------------|------------|
| H  | -2.3405335 | 4.8036805  | 0.7908833  |
| H  | 0.7655535  | 3.8756795  | -1.1379147 |
| H  | -0.8849115 | 3.2697475  | -1.4553637 |
| H  | -0.6207715 | 4.9823185  | -1.1140967 |
| H  | 1.3144685  | 4.8910325  | 1.1515583  |
| H  | 0.2487715  | 4.5426555  | 2.5248013  |
| H  | -0.2284565 | 5.7513085  | 1.3185983  |
| P  | -4.1255175 | -2.8645875 | 0.2232033  |
| C  | -4.7040225 | -2.1040695 | 1.7822653  |
| H  | -5.4781885 | -2.7305355 | 2.2416233  |
| H  | -3.8608245 | -1.9972235 | 2.4732713  |
| H  | -5.1136785 | -1.1150655 | 1.5587353  |
| C  | -5.6564315 | -2.9234015 | -0.7704757 |
| H  | -5.4573955 | -3.3998445 | -1.7350897 |
| H  | -6.4426135 | -3.4729195 | -0.2389197 |
| H  | -5.9798375 | -1.8933835 | -0.9504817 |
| C  | -3.8228965 | -4.6063665 | 0.7047013  |
| H  | -2.9755365 | -4.6386405 | 1.3988453  |
| H  | -4.7054825 | -5.0479175 | 1.1833403  |
| H  | -3.5590155 | -5.1907545 | -0.1824017 |
| H  | -0.5374785 | 1.8311525  | 1.9881003  |
| Sb | -4.7622575 | 1.2750595  | -0.7347877 |
| F  | -3.7265635 | 0.5045425  | 0.5489283  |
| F  | -4.5174955 | -0.1255385 | -1.7926757 |
| F  | -6.1282565 | 0.4260835  | 0.0074723  |
| F  | -5.7386815 | 2.0816915  | -1.9416447 |
| F  | -3.2341485 | 1.9686565  | -1.3513797 |

|               |            |            |            |
|---------------|------------|------------|------------|
| F             | -4.9368785 | 2.6410275  | 0.3713743  |
| <b>B-int3</b> |            |            |            |
| C             | 0.9002080  | -2.8302316 | 1.9098172  |
| C             | -0.0826870 | -2.5761016 | 2.8704752  |
| C             | -0.8480440 | -1.4148276 | 2.8123272  |
| C             | -0.5877570 | -0.5480496 | 1.7641102  |
| C             | 0.3681720  | -0.7806866 | 0.7976062  |
| C             | 1.1355810  | -1.9373446 | 0.8707522  |
| N             | -1.3014370 | 0.6982354  | 1.4925612  |
| C             | -0.6470000 | 1.3298814  | 0.2268812  |
| C             | 0.4194720  | 0.2988314  | -0.2376668 |
| N             | 0.0261370  | 2.5419844  | 0.5707402  |
| C             | 1.3865420  | 2.4801984  | 0.2867702  |
| C             | 1.7334820  | 1.0893354  | -0.2138658 |
| O             | 2.1827820  | 3.3914734  | 0.3565482  |
| N             | 2.1550240  | 1.1619704  | -1.5894958 |
| C             | 1.4082640  | 0.3665964  | -2.4480278 |
| C             | 0.2640910  | -0.1780366 | -1.6741688 |
| O             | 1.7248040  | 0.1794644  | -3.6116888 |
| C             | -0.7285440 | -0.9799136 | -2.1178828 |
| C             | -0.8429940 | -1.3602506 | -3.5639158 |
| Au            | -2.2207220 | -1.8168086 | -0.9380798 |
| C             | 6.2189980  | 0.4899484  | 0.4476002  |
| C             | 6.4522690  | -0.8130736 | 0.0011992  |
| C             | 5.7275270  | -1.3161766 | -1.0817678 |
| C             | 4.7841040  | -0.5068766 | -1.7089418 |
| C             | 4.5520510  | 0.7991974  | -1.2814648 |

|   |            |            |            |
|---|------------|------------|------------|
| C | 5.2760680  | 1.2822044  | -0.1883228 |
| C | 3.4862410  | 1.6312464  | -1.9403608 |
| O | 7.3955540  | -1.5106896 | 0.6834922  |
| C | 7.6879190  | -2.8146916 | 0.2499062  |
| C | -0.7219590 | 3.8477694  | 0.6498942  |
| C | -2.0943720 | 3.6188454  | 1.2749922  |
| C | -0.8829600 | 4.3870194  | -0.7672228 |
| C | 0.0337970  | 4.8326344  | 1.5381932  |
| H | 1.4891270  | -3.7412476 | 1.9787612  |
| H | -0.2477550 | -3.2867876 | 3.6759612  |
| H | -1.6120280 | -1.1991006 | 3.5564742  |
| H | 1.8928440  | -2.1319616 | 0.1123542  |
| H | -2.3155090 | 0.5344714  | 1.2887202  |
| H | -1.4726180 | 1.4594524  | -0.4834668 |
| H | 2.5172010  | 0.6436644  | 0.4222222  |
| H | -0.8174530 | -2.4541546 | -3.6619818 |
| H | -0.0662390 | -0.9253106 | -4.1978428 |
| H | -1.8316000 | -1.0576036 | -3.9350398 |
| H | 6.7928990  | 0.8538404  | 1.2962012  |
| H | 5.8952190  | -2.3249796 | -1.4480728 |
| H | 4.2183290  | -0.8921496 | -2.5577548 |
| H | 5.0853550  | 2.2945374  | 0.1678782  |
| H | 3.5822930  | 2.6850854  | -1.6530468 |
| H | 3.5378760  | 1.5580194  | -3.0327738 |
| H | 8.4723390  | -3.1939436 | 0.9082682  |
| H | 8.0543240  | -2.8271896 | -0.7868198 |
| H | 6.8116710  | -3.4758496 | 0.3217932  |

|    |            |            |            |
|----|------------|------------|------------|
| H  | -2.0182840 | 3.3072624  | 2.3276812  |
| H  | -2.7277780 | 2.9247094  | 0.7180202  |
| H  | -2.6346840 | 4.5712804  | 1.2796052  |
| H  | 0.0940370  | 4.5139364  | -1.2465118 |
| H  | -1.5025540 | 3.7184664  | -1.3771348 |
| H  | -1.3785500 | 5.3646374  | -0.7388298 |
| H  | 0.9741170  | 5.1579874  | 1.0939602  |
| H  | 0.2538760  | 4.3840404  | 2.5151202  |
| H  | -0.6066440 | 5.7068474  | 1.7038062  |
| P  | -3.9755550 | -2.9675846 | 0.2177652  |
| C  | -4.5570180 | -2.3426426 | 1.8364352  |
| H  | -5.2702770 | -3.0493636 | 2.2775022  |
| H  | -3.7053880 | -2.2173246 | 2.5138522  |
| H  | -5.0442460 | -1.3750046 | 1.6859072  |
| C  | -5.5333110 | -3.0965506 | -0.7267178 |
| H  | -5.3304000 | -3.4942146 | -1.7256538 |
| H  | -6.2466260 | -3.7462366 | -0.2055568 |
| H  | -5.9519650 | -2.0914206 | -0.8321978 |
| C  | -3.5326680 | -4.7073256 | 0.5847282  |
| H  | -2.6550270 | -4.7230356 | 1.2401282  |
| H  | -4.3614140 | -5.2372506 | 1.0697302  |
| H  | -3.2696430 | -5.2191266 | -0.3465438 |
| Sb | -4.9280290 | 1.1276454  | -0.5497148 |
| F  | -3.7916390 | 0.3623684  | 0.6802462  |
| F  | -4.6587860 | -0.2416096 | -1.6393018 |
| F  | -6.2013660 | 0.1886364  | 0.2440942  |
| F  | -6.0012360 | 1.9099504  | -1.6842938 |

|              |            |            |            |
|--------------|------------|------------|------------|
| F            | -3.4578720 | 1.8956564  | -1.2012708 |
| F            | -5.1017590 | 2.4442254  | 0.6106482  |
| H            | -1.2261940 | 1.3691684  | 2.2616672  |
| <b>B-ts4</b> |            |            |            |
| C            | -0.5719712 | -1.0828484 | 3.2463499  |
| C            | -1.8394772 | -0.5054734 | 3.2511019  |
| C            | -2.2856382 | 0.2769346  | 2.1817769  |
| C            | -1.3978782 | 0.4526676  | 1.1408789  |
| C            | -0.1236732 | -0.1079344 | 1.1158889  |
| C            | 0.3041848  | -0.8903324 | 2.1726839  |
| N            | -1.5823922 | 1.1491976  | -0.0992081 |
| C            | -0.2543102 | 1.6104136  | -0.5015311 |
| C            | 0.5410028  | 0.3169176  | -0.1638711 |
| N            | 0.4558078  | 2.6513076  | 0.2069279  |
| C            | 1.7975498  | 2.3005896  | 0.3010369  |
| C            | 1.9517098  | 0.8274716  | -0.1178471 |
| O            | 2.7315278  | 2.9928456  | 0.6481879  |
| N            | 2.3801208  | 0.6544416  | -1.4931591 |
| C            | 1.5873618  | -0.2132684 | -2.2314721 |
| C            | 0.3621518  | -0.4961844 | -1.4118221 |
| O            | 1.8680878  | -0.6267114 | -3.3419191 |
| C            | -0.8667272 | -0.9208644 | -1.8005941 |
| C            | -1.1650362 | -1.2676594 | -3.2350031 |
| Au           | -2.3303762 | -1.9824954 | -0.5879561 |
| C            | 6.3379408  | -0.0805624 | 0.6016829  |
| C            | 6.6920918  | -1.3367464 | 0.1003699  |
| C            | 6.0839828  | -1.8190504 | -1.0601191 |

|   |            |            |            |
|---|------------|------------|------------|
| C | 5.1328538  | -1.0364554 | -1.7089021 |
| C | 4.7817968  | 0.2213676  | -1.2258351 |
| C | 5.3924068  | 0.6879636  | -0.0568161 |
| C | 3.7225718  | 1.0308636  | -1.9193661 |
| O | 7.6308508  | -2.0100374 | 0.8107209  |
| C | 8.0302438  | -3.2724414 | 0.3394879  |
| C | -0.1614602 | 4.0013226  | 0.3893599  |
| C | -0.8769272 | 4.4015776  | -0.9004611 |
| C | 0.8873778  | 5.0595206  | 0.7134489  |
| C | -1.1600042 | 3.9236326  | 1.5448409  |
| H | -0.2538322 | -1.6842024 | 4.0944579  |
| H | -2.4976902 | -0.6618514 | 4.1029829  |
| H | -3.2809892 | 0.7088666  | 2.1472879  |
| H | 1.2956958  | -1.3382844 | 2.1755959  |
| H | -1.6202602 | 0.1095526  | -0.9862911 |
| H | -0.2974062 | 1.8240586  | -1.5785211 |
| H | 2.6330488  | 0.3244166  | 0.5862999  |
| H | -1.2548042 | -2.3542254 | -3.3674831 |
| H | -0.3869572 | -0.9175174 | -3.9216291 |
| H | -2.1363502 | -0.8411374 | -3.5126491 |
| H | 6.8255048  | 0.2674446  | 1.5088269  |
| H | 6.3442448  | -2.7920524 | -1.4664061 |
| H | 4.6498908  | -1.4094364 | -2.6120871 |
| H | 5.1053728  | 1.6627976  | 0.3393799  |
| H | 3.8603638  | 2.1011246  | -1.7190291 |
| H | 3.7471958  | 0.8723416  | -3.0031021 |
| H | 8.7858788  | -3.6404854 | 1.0366209  |

|    |            |            |            |
|----|------------|------------|------------|
| H  | 8.4713398  | -3.2111854 | -0.6659091 |
| H  | 7.1911338  | -3.9829694 | 0.3144809  |
| H  | -1.7225862 | 3.7472936  | -1.1452791 |
| H  | -0.1826362 | 4.4162936  | -1.7494951 |
| H  | -1.2878022 | 5.4103116  | -0.7829561 |
| H  | 1.4201008  | 4.8417486  | 1.6418829  |
| H  | 1.6296958  | 5.1616986  | -0.0828241 |
| H  | 0.3648288  | 6.0168226  | 0.8265069  |
| H  | -0.6689122 | 3.5541756  | 2.4524249  |
| H  | -2.0173912 | 3.2779026  | 1.3233799  |
| H  | -1.5581142 | 4.9242526  | 1.7511019  |
| P  | -3.9357472 | -3.3413234 | 0.4383639  |
| C  | -5.5334222 | -3.3492684 | -0.4349261 |
| H  | -6.2656162 | -3.9502634 | 0.1177549  |
| H  | -5.8963042 | -2.3221914 | -0.5471381 |
| H  | -5.3948262 | -3.7748874 | -1.4338911 |
| C  | -3.4750712 | -5.1071254 | 0.5487289  |
| H  | -2.5590212 | -5.2112214 | 1.1385259  |
| H  | -4.2783342 | -5.6874004 | 1.0183539  |
| H  | -3.2851482 | -5.4999164 | -0.4549711 |
| C  | -4.3387912 | -2.8858324 | 2.1559839  |
| H  | -4.7190922 | -1.8603794 | 2.1537869  |
| H  | -5.0937962 | -3.5700914 | 2.5612869  |
| H  | -3.4311862 | -2.9307844 | 2.7670039  |
| H  | -2.4220482 | 1.7332606  | -0.1984141 |
| Sb | -5.2798332 | 0.9329176  | -0.6610341 |
| F  | -3.9198182 | 0.4075856  | -1.6951981 |



|   |            |            |            |
|---|------------|------------|------------|
| F | -5.7563252 | 2.1134476  | -1.8644651 |
| F | -6.3135842 | -0.3261304 | -1.3368761 |
| F | -6.5005282 | 1.4822676  | 0.4734829  |
| F | -4.1031602 | 2.1002456  | 0.0673679  |
| F | -4.7126582 | -0.2506304 | 0.5698479  |

**B-2**

|    |            |            |            |
|----|------------|------------|------------|
| C  | -1.0014901 | -2.8458154 | 1.9831037  |
| C  | -2.3357991 | -3.1907224 | 1.7435867  |
| C  | -3.1231551 | -2.5148344 | 0.8184087  |
| C  | -2.5273381 | -1.4778674 | 0.0964327  |
| C  | -1.1814271 | -1.1578114 | 0.2900537  |
| C  | -0.4242151 | -1.8045204 | 1.2575327  |
| N  | -3.0765921 | -0.6678524 | -0.8703723 |
| C  | -2.2179341 | 0.4429366  | -1.1630613 |
| C  | -0.8157941 | -0.0526934 | -0.6610493 |
| N  | -2.4279941 | 1.6982006  | -0.4246323 |
| C  | -1.3256931 | 2.1223576  | 0.2528407  |
| C  | -0.1774761 | 1.1651156  | -0.0323153 |
| O  | -1.1810141 | 3.1248836  | 0.9354657  |
| N  | 0.6963929  | 1.6957186  | -1.0710323 |
| C  | 0.9369059  | 0.8324706  | -2.0974723 |
| C  | 0.0674769  | -0.3753374 | -1.8404523 |
| O  | 1.7493499  | 0.9855076  | -2.9969973 |
| C  | -0.0361491 | -1.4912934 | -2.6343673 |
| C  | 0.5655269  | -1.6783624 | -3.9884433 |
| Au | 1.7213289  | -1.8195634 | -1.0390113 |
| C  | 3.7174689  | 2.0721616  | 2.2722777  |

|   |            |            |            |
|---|------------|------------|------------|
| C | 4.8480329  | 1.4814416  | 1.6985737  |
| C | 4.9207979  | 1.3231986  | 0.3118287  |
| C | 3.8619899  | 1.7584876  | -0.4854863 |
| C | 2.7389569  | 2.3659986  | 0.0749927  |
| C | 2.6789019  | 2.5108016  | 1.4657307  |
| C | 1.5937379  | 2.8121686  | -0.7947803 |
| O | 5.8064009  | 1.0766076  | 2.5688967  |
| C | 6.9995319  | 0.5554386  | 2.0403597  |
| C | -3.6567761 | 2.5581146  | -0.5633303 |
| C | -4.5929721 | 1.9829386  | -1.6203843 |
| C | -3.2319701 | 3.9524376  | -1.0237853 |
| C | -4.3660331 | 2.6052736  | 0.7837817  |
| H | -0.4346951 | -3.3547754 | 2.7603697  |
| H | -2.7898271 | -3.9907604 | 2.3240927  |
| H | -4.1785011 | -2.7469694 | 0.6958377  |
| H | 0.5883039  | -1.4647474 | 1.4827427  |
| H | -2.2302851 | 0.6602646  | -2.2425753 |
| H | 0.3953029  | 0.9582696  | 0.8856657  |
| H | 0.9742869  | -2.6879064 | -4.1064333 |
| H | 1.3325239  | -0.9305694 | -4.1992933 |
| H | -0.2344631 | -1.5793914 | -4.7345743 |
| H | 3.6874049  | 2.1862296  | 3.3528977  |
| H | 5.8051839  | 0.8994846  | -0.1581253 |
| H | 3.9141669  | 1.6400656  | -1.5674743 |
| H | 1.8026939  | 2.9821186  | 1.9120337  |
| H | 1.0052159  | 3.5974296  | -0.3069173 |
| H | 1.9494669  | 3.1818506  | -1.7619163 |

|   |            |            |            |
|---|------------|------------|------------|
| H | 7.6475989  | 0.3335726  | 2.8903847  |
| H | 7.5047389  | 1.2766456  | 1.3828827  |
| H | 6.8254709  | -0.3738454 | 1.4738917  |
| H | -5.0445111 | 1.0299356  | -1.3403833 |
| H | -4.1087321 | 1.8994786  | -2.6021393 |
| H | -5.4325991 | 2.6774506  | -1.7307963 |
| H | -2.5950881 | 4.4489256  | -0.2892453 |
| H | -2.6959571 | 3.8961496  | -1.9810973 |
| H | -4.1295741 | 4.5627146  | -1.1757583 |
| H | -3.7138411 | 3.0364296  | 1.5501677  |
| H | -4.6793391 | 1.6006566  | 1.0851167  |
| H | -5.2668301 | 3.2250106  | 0.6990057  |
| P | 3.4014549  | -2.6173284 | 0.3754087  |
| C | 3.1533759  | -4.3623014 | 0.8329817  |
| H | 3.8948959  | -4.6744254 | 1.5774787  |
| H | 2.1459609  | -4.4730204 | 1.2497097  |
| H | 3.2341799  | -4.9998784 | -0.0523633 |
| C | 5.1000659  | -2.4881214 | -0.2646083 |
| H | 5.3148599  | -1.4313394 | -0.4575483 |
| H | 5.8147329  | -2.8817484 | 0.4681267  |
| H | 5.1933469  | -3.0433184 | -1.2024093 |
| C | 3.4083409  | -1.7155484 | 1.9582857  |
| H | 2.5174829  | -1.9888894 | 2.5343697  |
| H | 4.3019039  | -1.9745184 | 2.5394527  |
| H | 3.3937269  | -0.6341364 | 1.7754907  |
| H | -4.0811941 | -0.6773344 | -1.0453343 |
| H | -0.7681591 | -2.2357664 | -2.3025483 |

|    |            |            |            |
|----|------------|------------|------------|
| Sb | -6.7826321 | -0.9716904 | 0.3712657  |
| F  | -7.0552551 | 0.7386956  | 0.0026887  |
| F  | -5.8102061 | -1.0923424 | -1.1528023 |
| F  | -5.2440401 | -0.5164704 | 1.1616957  |
| F  | -6.3696361 | -2.6717744 | 0.6838017  |
| F  | -8.2131251 | -1.4502094 | -0.5307073 |
| F  | -7.6511731 | -0.8478404 | 1.8923107  |

**B-int4**

|    |            |            |            |
|----|------------|------------|------------|
| C  | -1.1950499 | 2.3061437  | -3.2101657 |
| C  | -2.5853979 | 2.4031717  | -3.3021877 |
| C  | -3.4104989 | 1.8676777  | -2.3157467 |
| C  | -2.7679119 | 1.2564027  | -1.2564037 |
| C  | -1.3877949 | 1.1226347  | -1.1517447 |
| C  | -0.5778069 | 1.6551047  | -2.1400817 |
| N  | -3.3512869 | 0.6356727  | -0.1302077 |
| C  | -2.4574609 | 0.1123107  | 0.6410903  |
| C  | -1.0763069 | 0.3673707  | 0.1234463  |
| C  | -0.2153589 | 1.2336157  | 1.1016073  |
| N  | 1.1303161  | 0.7673587  | 0.8951083  |
| C  | 1.2024121  | -0.4456913 | 0.2288513  |
| C  | -0.1804889 | -0.8688943 | -0.0926207 |
| O  | 2.2647291  | -0.9977283 | -0.0237797 |
| C  | -0.7277009 | 1.1098767  | 2.5408593  |
| O  | -1.8490309 | 1.5384107  | 2.7957653  |
| N  | 0.1017421  | 0.5081917  | 3.4115133  |
| C  | -0.5075839 | -2.0614923 | -0.6335287 |
| Au | 1.0001291  | -3.4417043 | -0.9774557 |

|   |            |            |            |
|---|------------|------------|------------|
| C | -1.9041489 | -2.3836683 | -1.0509947 |
| C | -0.2281769 | 0.1907527  | 4.8173153  |
| C | 0.9918861  | -0.5144953 | 5.3933823  |
| C | -0.4992939 | 1.4797657  | 5.5853903  |
| C | -1.4398399 | -0.7358253 | 4.8652323  |
| C | 2.9414941  | 2.8402087  | -2.5360217 |
| C | 2.3414801  | 4.1060307  | -2.5359857 |
| C | 1.7858071  | 4.6087397  | -1.3600127 |
| C | 1.8159801  | 3.8307557  | -0.2035307 |
| C | 2.3836351  | 2.5608697  | -0.1965177 |
| C | 2.9578841  | 2.0792987  | -1.3809307 |
| C | 2.2799521  | 1.6611537  | 1.0025733  |
| O | 2.3500151  | 4.7588137  | -3.7216737 |
| C | 1.7097321  | 6.0105377  | -3.7866557 |
| H | -0.5750229 | 2.7319867  | -3.9967647 |
| H | -3.0330239 | 2.8939557  | -4.1623597 |
| H | -4.4950139 | 1.8943167  | -2.3707677 |
| H | 0.5071431  | 1.5725177  | -2.0921407 |
| H | -4.3774439 | 0.5250717  | -0.0287937 |
| H | -2.7402749 | -0.4654283 | 1.5146673  |
| H | -0.3194799 | 2.2944667  | 0.8293063  |
| H | 0.9635891  | 0.1417927  | 3.0238023  |
| H | -2.6882999 | -1.9928153 | -0.3891237 |
| H | -2.1019679 | -1.9504373 | -2.0427717 |
| H | -2.0768469 | -3.4594923 | -1.1428097 |
| H | 1.2049741  | -1.4453443 | 4.8517263  |
| H | 0.8141771  | -0.7711403 | 6.4432473  |

|   |            |            |            |
|---|------------|------------|------------|
| H | 1.8790781  | 0.1301337  | 5.3485853  |
| H | -1.3532979 | 2.0132787  | 5.1589223  |
| H | -0.7200869 | 1.2466257  | 6.6339303  |
| H | 0.3781921  | 2.1370517  | 5.5573223  |
| H | -2.3257959 | -0.2409343 | 4.4566303  |
| H | -1.6520349 | -1.0202363 | 5.9028003  |
| H | -1.2482799 | -1.6516033 | 4.2920523  |
| H | 3.3794691  | 2.4800147  | -3.4635417 |
| H | 1.3264091  | 5.5920587  | -1.3310317 |
| H | 1.3798091  | 4.2292767  | 0.7131993  |
| H | 3.3966011  | 1.0820167  | -1.3872967 |
| H | 3.1615961  | 1.0162677  | 1.0917023  |
| H | 2.1818321  | 2.2412327  | 1.9310393  |
| H | 1.8025941  | 6.3540577  | -4.8186667 |
| H | 2.1844431  | 6.7457747  | -3.1214637 |
| H | 0.6437151  | 5.9319917  | -3.5279447 |
| P | 2.8120771  | -4.9104243 | -1.3445077 |
| C | 4.3878111  | -3.9887383 | -1.2421177 |
| H | 4.4347141  | -3.4751443 | -0.2765097 |
| H | 5.2529941  | -4.6524373 | -1.3582457 |
| H | 4.4026291  | -3.2219023 | -2.0231477 |
| C | 2.9169341  | -5.7688603 | -2.9559797 |
| H | 3.8399561  | -6.3568683 | -3.0262537 |
| H | 2.0541821  | -6.4311413 | -3.0754607 |
| H | 2.8941351  | -5.0301493 | -3.7629367 |
| C | 3.0301171  | -6.2640993 | -0.1334147 |
| H | 3.9440881  | -6.8329323 | -0.3426107 |

|    |            |            |            |
|----|------------|------------|------------|
| H  | 3.0876271  | -5.8414463 | 0.8743653  |
| H  | 2.1669391  | -6.9353733 | -0.1736557 |
| Sb | -5.9893099 | -1.4999173 | -0.9410717 |
| F  | -7.3401309 | -1.6659363 | 0.1682613  |
| F  | -5.9255829 | 0.2870617  | -0.5853457 |
| F  | -7.0612799 | -1.1825223 | -2.2943907 |
| F  | -5.8781699 | -3.2238853 | -1.2429937 |
| F  | -4.8507089 | -1.6327353 | 0.4425683  |
| F  | -4.5718309 | -1.1903793 | -1.9759007 |

**B-ts5**

|   |            |            |            |
|---|------------|------------|------------|
| C | 0.1196026  | 0.7566996  | 4.4898975  |
| C | -0.7917014 | -0.1858644 | 4.9608625  |
| C | -1.5976634 | -0.9177074 | 4.0861835  |
| C | -1.4648954 | -0.6516364 | 2.7360885  |
| C | -0.5544704 | 0.2977406  | 2.2469755  |
| C | 0.2627796  | 0.9906036  | 3.1203085  |
| N | -2.2303564 | -1.1922814 | 1.6647065  |
| C | -1.8995394 | -0.5194894 | 0.5497765  |
| C | -0.5423234 | 0.1159626  | 0.7492855  |
| N | -1.3538494 | -1.0021964 | -1.3204075 |
| C | -1.0249644 | 0.3899976  | -1.6073945 |
| C | -0.4582094 | 1.1359916  | -0.3721445 |
| O | -1.2041064 | 0.9195686  | -2.6705125 |
| N | 0.9473656  | 1.3885796  | -0.5655975 |
| C | 1.7007616  | 0.2999896  | -0.1892605 |
| C | 0.7850056  | -0.6869134 | 0.4691445  |
| O | 2.9006606  | 0.2059336  | -0.4029075 |

|    |            |            |            |
|----|------------|------------|------------|
| C  | 1.1821026  | -1.9458734 | 0.7620705  |
| C  | 0.3141826  | -2.9744944 | 1.4220695  |
| Au | 3.1404026  | -2.5008564 | 0.3064925  |
| C  | -0.6348054 | 5.6213656  | -1.4153415 |
| C  | -0.1469744 | 6.2590416  | -0.2712445 |
| C  | 0.8608066  | 5.6535676  | 0.4837975  |
| C  | 1.3683026  | 4.4221626  | 0.0819215  |
| C  | 0.8973036  | 3.7806546  | -1.0609165 |
| C  | -0.1173394 | 4.3958436  | -1.8002635 |
| C  | 1.4314966  | 2.4342026  | -1.4549675 |
| O  | -0.7118744 | 7.4529926  | 0.0225485  |
| C  | -0.2626174 | 8.1323476  | 1.1692935  |
| C  | -2.2562574 | -1.7903964 | -2.2400345 |
| C  | -2.5422584 | -3.0901804 | -1.5002515 |
| C  | -1.5032864 | -2.0752624 | -3.5355365 |
| C  | -3.5394044 | -1.0176304 | -2.5019345 |
| H  | 0.7277716  | 1.3150316  | 5.1967025  |
| H  | -0.8823044 | -0.3563104 | 6.0305935  |
| H  | -2.3132834 | -1.6499844 | 4.4503295  |
| H  | 0.9875226  | 1.7112686  | 2.7458125  |
| H  | -3.2099424 | -1.4863684 | 1.7441385  |
| H  | -2.7285144 | -0.0047454 | 0.0634075  |
| H  | -0.4939084 | -1.5224004 | -1.1051355 |
| H  | -1.0207384 | 2.0682256  | -0.2263035 |
| H  | 0.6969926  | -3.9866394 | 1.2682595  |
| H  | -0.7358774 | -2.9547374 | 1.1071725  |
| H  | 0.3170126  | -2.7968664 | 2.5087755  |



|   |            |            |            |
|---|------------|------------|------------|
| H | -1.4233864 | 6.1108336  | -1.9807715 |
| H | 1.2557736  | 6.1312186  | 1.3754815  |
| H | 2.1557996  | 3.9493766  | 0.6696385  |
| H | -0.5090334 | 3.8974976  | -2.6867345 |
| H | 1.1480616  | 2.2007646  | -2.4929275 |
| H | 2.5248876  | 2.3858076  | -1.3905385 |
| H | -0.8396414 | 9.0571716  | 1.2282305  |
| H | 0.8062206  | 8.3812806  | 1.1017425  |
| H | -0.4343624 | 7.5452846  | 2.0829135  |
| H | -3.1116404 | -2.9113754 | -0.5833115 |
| H | -1.6092114 | -3.6236464 | -1.2660095 |
| H | -3.1609084 | -3.7378154 | -2.1292415 |
| H | -1.2563564 | -1.1533014 | -4.0694235 |
| H | -0.5791864 | -2.6370564 | -3.3424295 |
| H | -2.1370934 | -2.6910044 | -4.1842715 |
| H | -3.3654294 | -0.1441024 | -3.1359895 |
| H | -4.0410334 | -0.7080184 | -1.5804265 |
| H | -4.2503574 | -1.6810814 | -3.0039245 |
| P | 5.3716526  | -3.0250354 | -0.2518645 |
| C | 6.1790686  | -1.5739884 | -1.0150565 |
| H | 7.2198896  | -1.7890214 | -1.2850885 |
| H | 5.6166836  | -1.2802004 | -1.9070015 |
| H | 6.1417946  | -0.7354454 | -0.3124935 |
| C | 6.4951816  | -3.4698714 | 1.1207985  |
| H | 6.1485776  | -4.3922324 | 1.5965395  |
| H | 7.5193066  | -3.6116914 | 0.7552205  |
| H | 6.4848206  | -2.6727794 | 1.8704535  |

|    |            |            |            |
|----|------------|------------|------------|
| C  | 5.6445516  | -4.3619124 | -1.4695875 |
| H  | 5.0895146  | -4.1373464 | -2.3855305 |
| H  | 6.7106736  | -4.4619304 | -1.7061515 |
| H  | 5.2715406  | -5.3084454 | -1.0668435 |
| Sb | -6.2791914 | -2.0136204 | 0.1723175  |
| F  | -4.5448644 | -1.6633594 | 0.6663795  |
| F  | -5.6074784 | -2.9008364 | -1.2124775 |
| F  | -6.1750374 | -0.5157254 | -0.7721615 |
| F  | -7.9281814 | -2.3174414 | -0.3380585 |
| F  | -6.1727744 | -3.4846254 | 1.1397935  |
| F  | -6.7774344 | -1.0952604 | 1.5923435  |

**C-1**

|   |            |            |            |
|---|------------|------------|------------|
| C | 4.4523686  | -2.2565144 | 0.5131612  |
| C | 3.9198066  | -3.2591964 | -0.3155328 |
| C | 2.7632906  | -3.0471004 | -1.0475718 |
| C | 2.1435316  | -1.8033154 | -0.9282568 |
| C | 2.6554316  | -0.7842244 | -0.0836788 |
| C | 3.8333236  | -1.0247344 | 0.6384772  |
| N | 1.0100976  | -1.3114284 | -1.5363008 |
| C | 0.7830016  | -0.0446134 | -1.0926768 |
| C | 1.7572566  | 0.3307306  | -0.2030578 |
| O | 3.5660916  | 2.1427056  | 2.0165422  |
| C | 3.1090566  | 2.1612346  | 0.8819502  |
| C | 1.7175456  | 1.6205426  | 0.5528222  |
| N | 3.8575706  | 2.6856276  | -0.1342788 |
| N | 0.8604766  | 1.5715796  | 1.7524862  |
| C | -0.3863184 | 2.1004326  | 1.7425932  |

|   |            |            |            |
|---|------------|------------|------------|
| C | -0.8846844 | 2.5944046  | 0.4371622  |
| C | -1.3532924 | 2.8782546  | -0.6642808 |
| C | -1.7133284 | 3.1916556  | -2.0415558 |
| O | -1.1587194 | 2.1086226  | 2.6956032  |
| C | 3.7685246  | 2.8166326  | -1.6073458 |
| C | 4.7374836  | 3.9462546  | -1.9551378 |
| C | 4.2219496  | 1.5304636  | -2.2954098 |
| C | 2.3768336  | 3.2144386  | -2.0919728 |
| C | -0.5687314 | -2.4381214 | 1.4398442  |
| C | 0.2994566  | -3.4462464 | 1.8574042  |
| C | 1.3835206  | -3.1292474 | 2.6783382  |
| C | 1.6324616  | -1.8081834 | 3.0137132  |
| C | 0.7968516  | -0.7778624 | 2.5741562  |
| C | -0.3188594 | -1.1223014 | 1.8173092  |
| C | 1.1662276  | 0.6582146  | 2.8697282  |
| O | 0.1797396  | -4.7528184 | 1.5009512  |
| C | -0.7539804 | -5.0578744 | 0.4971952  |
| H | 5.3640806  | -2.4579044 | 1.0713452  |
| H | 4.4259906  | -4.2193784 | -0.3845708 |
| H | 2.3518996  | -3.8201474 | -1.6931388 |
| H | 4.2409386  | -0.2606314 | 1.2998292  |
| H | 0.3439386  | -1.7838934 | -2.1371528 |
| H | -0.1008864 | 0.4867036  | -1.4217988 |
| H | 1.2504486  | 2.3699416  | -0.0924668 |
| H | 4.7693566  | 2.9292196  | 0.2393572  |
| H | -2.4239524 | 4.0229566  | -2.0879028 |
| H | -2.1850674 | 2.3152706  | -2.5102638 |

|    |            |            |            |
|----|------------|------------|------------|
| H  | -0.8163954 | 3.4602676  | -2.6110248 |
| H  | 4.4323286  | 4.8857296  | -1.4790228 |
| H  | 4.7686766  | 4.0987446  | -3.0395738 |
| H  | 5.7570196  | 3.7049596  | -1.6266138 |
| H  | 3.5355886  | 0.7028986  | -2.0882838 |
| H  | 4.2673246  | 1.6804346  | -3.3815928 |
| H  | 5.2203346  | 1.2398766  | -1.9465808 |
| H  | 2.4449986  | 3.5223646  | -3.1421968 |
| H  | 1.9815326  | 4.0617266  | -1.5157298 |
| H  | 1.6743476  | 2.3744966  | -2.0513218 |
| H  | -1.4109394 | -2.6345814 | 0.7799072  |
| H  | 2.0543956  | -3.9288454 | 2.9826212  |
| H  | 2.5226746  | -1.5643254 | 3.5938092  |
| H  | -0.9975144 | -0.3610184 | 1.4367072  |
| H  | 0.6193156  | 1.0489976  | 3.7343042  |
| H  | 2.2342326  | 0.7522616  | 3.0804842  |
| H  | -0.6338274 | -6.1195114 | 0.2687522  |
| H  | -0.5742884 | -4.4666154 | -0.4143368 |
| H  | -1.7893994 | -4.8797094 | 0.8239712  |
| Au | -3.1681834 | 1.8438296  | 0.5035802  |
| P  | -5.1217794 | 0.7298086  | 1.0617562  |
| C  | -4.6977114 | -0.9185314 | 1.7050232  |
| H  | -4.1148624 | -0.8015874 | 2.6247632  |
| H  | -5.6062984 | -1.4972894 | 1.9094392  |
| H  | -4.0740444 | -1.4289804 | 0.9647842  |
| C  | -6.2329154 | 0.4746196  | -0.3550248 |
| H  | -7.0220794 | -0.2410774 | -0.0955718 |

|              |            |            |            |
|--------------|------------|------------|------------|
| H            | -6.6826854 | 1.4339566  | -0.6298978 |
| H            | -5.6474054 | 0.1094956  | -1.2051048 |
| C            | -6.1593204 | 1.4859206  | 2.3570682  |
| H            | -7.0240064 | 0.8465456  | 2.5712062  |
| H            | -5.5672424 | 1.6147156  | 3.2681362  |
| H            | -6.5078414 | 2.4689626  | 2.0267952  |
| C            | -3.6518254 | -2.3343934 | -2.0339578 |
| F            | -3.9913174 | -2.6331374 | -3.2757378 |
| F            | -4.7686484 | -2.2200954 | -1.3046008 |
| F            | -2.9348304 | -3.3353204 | -1.5267998 |
| S            | -2.6854634 | -0.7767674 | -1.9583128 |
| O            | -1.5420754 | -1.0386664 | -2.8418338 |
| O            | -2.3576274 | -0.6931584 | -0.5189698 |
| O            | -3.6229754 | 0.2628476  | -2.4166328 |
| <b>C-ts1</b> |            |            |            |
| C            | -1.6920928 | -1.5757600 | -3.8049249 |
| C            | -0.6689908 | -1.4575400 | -4.7591239 |
| C            | 0.6603552  | -1.3390020 | -4.3801949 |
| C            | 0.9365122  | -1.3382740 | -3.0150409 |
| C            | -0.0832678 | -1.4276350 | -2.0408909 |
| C            | -1.4152318 | -1.5601440 | -2.4457899 |
| N            | 2.1472212  | -1.2616470 | -2.3512699 |
| C            | 1.9337322  | -1.2762530 | -1.0193239 |
| C            | 0.5723322  | -1.3319290 | -0.7535799 |
| C            | -0.0804778 | -1.5697010 | 0.5613191  |
| N            | -1.0783198 | -0.5297180 | 0.8477941  |
| C            | -0.9978538 | 0.7190820  | 0.3600751  |

|    |            |            |            |
|----|------------|------------|------------|
| C  | 0.1495022  | 1.0254850  | -0.5147429 |
| O  | -1.7999098 | 1.6223480  | 0.6194931  |
| C  | 0.8524102  | -1.7166460 | 1.7793891  |
| O  | 0.7184682  | -2.6865550 | 2.5130801  |
| N  | 1.7019592  | -0.6834430 | 1.9922701  |
| C  | 0.8796492  | 1.8317470  | -1.1567959 |
| Au | -0.2355408 | 3.6376790  | -0.5951239 |
| C  | 2.0659592  | 1.9785080  | -2.0211339 |
| C  | 2.7127222  | -0.6150450 | 3.0749981  |
| C  | 3.3231912  | 0.7786620  | 2.9938171  |
| C  | 2.0389442  | -0.8054860 | 4.4294171  |
| C  | 3.7868072  | -1.6719190 | 2.8385201  |
| C  | -5.0331388 | -1.9262010 | -0.4576069 |
| C  | -5.0090848 | -3.3205090 | -0.3246389 |
| C  | -4.0774168 | -3.9207430 | 0.5214691  |
| C  | -3.1760598 | -3.1219550 | 1.2238981  |
| C  | -3.1877688 | -1.7370580 | 1.0960121  |
| C  | -4.1307888 | -1.1484520 | 0.2442111  |
| C  | -2.1572738 | -0.8838400 | 1.7760321  |
| O  | -5.9294208 | -3.9937100 | -1.0543939 |
| C  | -5.9384818 | -5.3979500 | -0.9659849 |
| H  | -2.7213648 | -1.6837240 | -4.1393829 |
| H  | -0.9225178 | -1.4685340 | -5.8165829 |
| H  | 1.4579182  | -1.2633060 | -5.1154139 |
| H  | -2.2170848 | -1.6540950 | -1.7121519 |
| H  | 3.0790012  | -1.0327260 | -2.7221489 |
| H  | 2.7745032  | -1.2036750 | -0.3398949 |

|   |            |            |            |
|---|------------|------------|------------|
| H | -0.6381538 | -2.5173130 | 0.5264991  |
| H | 1.8282462  | -0.0102980 | 1.2435131  |
| H | 1.8662752  | 1.5114440  | -2.9928869 |
| H | 2.3410962  | 3.0219800  | -2.1867539 |
| H | 2.9134222  | 1.4535420  | -1.5597119 |
| H | 3.7957142  | 0.9451460  | 2.0173071  |
| H | 4.0932972  | 0.8889800  | 3.7657141  |
| H | 2.5579882  | 1.5480800  | 3.1649821  |
| H | 1.6120012  | -1.8065030 | 4.5258731  |
| H | 2.7795642  | -0.6564600 | 5.2247031  |
| H | 1.2383732  | -0.0670560 | 4.5656261  |
| H | 3.3454482  | -2.6739690 | 2.8164941  |
| H | 4.5287522  | -1.6396440 | 3.6461631  |
| H | 4.3094822  | -1.4829830 | 1.8928841  |
| H | -5.7745868 | -1.4869660 | -1.1202629 |
| H | -4.0406458 | -4.9992910 | 0.6409251  |
| H | -2.4419608 | -3.5900260 | 1.8810731  |
| H | -4.1391488 | -0.0641900 | 0.1323481  |
| H | -2.5847748 | 0.0549250  | 2.1398601  |
| H | -1.7018898 | -1.4141140 | 2.6228711  |
| H | -6.7367888 | -5.7456270 | -1.6245839 |
| H | -6.1456688 | -5.7390530 | 0.0584381  |
| H | -4.9849158 | -5.8317630 | -1.2990539 |
| P | -1.3219918 | 5.6222870  | -0.0417819 |
| C | -2.7814108 | 5.2507370  | 0.9846581  |
| H | -2.4584058 | 4.7230840  | 1.8874971  |
| H | -3.3156358 | 6.1680110  | 1.2588031  |

|               |            |            |            |
|---------------|------------|------------|------------|
| H             | -3.4471298 | 4.5815340  | 0.4307301  |
| C             | -1.9671898 | 6.5967100  | -1.4411859 |
| H             | -2.5123838 | 7.4752930  | -1.0766779 |
| H             | -1.1389328 | 6.9209840  | -2.0781129 |
| H             | -2.6390918 | 5.9736770  | -2.0390609 |
| C             | -0.3468438 | 6.8111610  | 0.9372541  |
| H             | -0.9586488 | 7.6808500  | 1.2043541  |
| H             | 0.0112602  | 6.3238040  | 1.8490061  |
| H             | 0.5219312  | 7.1401970  | 0.3594881  |
| C             | 5.9612792  | -1.5154450 | -0.7295629 |
| F             | 4.9598262  | -2.4035890 | -0.6893029 |
| F             | 6.5125992  | -1.4626980 | 0.4783011  |
| F             | 6.8663842  | -1.9475120 | -1.5945529 |
| S             | 5.3126642  | 0.1286410  | -1.2184039 |
| O             | 4.6882202  | -0.1552650 | -2.5322129 |
| O             | 6.4775292  | 1.0008500  | -1.2432809 |
| O             | 4.3157392  | 0.3975110  | -0.1536409 |
| <b>C-int4</b> |            |            |            |
| C             | -0.2258950 | 3.1446503  | -3.1635131 |
| C             | -1.3596740 | 2.9059273  | -3.9418381 |
| C             | -2.2250910 | 1.8516173  | -3.6513891 |
| C             | -1.8971500 | 1.0675323  | -2.5601421 |
| C             | -0.7615940 | 1.2803583  | -1.7795981 |
| C             | 0.0903580  | 2.3297123  | -2.0748901 |
| N             | -2.6002340 | -0.0387127 | -2.0219721 |
| C             | -1.9993610 | -0.5002017 | -0.9741471 |
| C             | -0.7499010 | 0.2538423  | -0.6726251 |



|    |            |            |            |
|----|------------|------------|------------|
| C  | -0.7727920 | 0.9178393  | 0.7453599  |
| N  | 0.5791140  | 0.7820773  | 1.2226349  |
| C  | 1.3603210  | -0.0799217 | 0.4765779  |
| C  | 0.5152730  | -0.6256447 | -0.6121661 |
| O  | 2.5379520  | -0.3000947 | 0.7266179  |
| C  | -1.8522440 | 0.2638743  | 1.6158349  |
| O  | -3.0168890 | 0.5993673  | 1.4417229  |
| N  | -1.4207250 | -0.7104537 | 2.4394989  |
| C  | 0.8612450  | -1.6591247 | -1.4064451 |
| Au | 2.6707820  | -2.6130667 | -1.0473451 |
| C  | -0.0344340 | -2.1197137 | -2.5173731 |
| C  | -2.2923740 | -1.5851167 | 3.2557639  |
| C  | -1.3710130 | -2.5959447 | 3.9243179  |
| C  | -3.0091830 | -0.7464937 | 4.3090369  |
| C  | -3.2998310 | -2.3026867 | 2.3631609  |
| C  | 2.7434560  | 4.2717803  | -0.2622781 |
| C  | 1.7938880  | 5.3018113  | -0.2736411 |
| C  | 0.6760640  | 5.2214103  | 0.5556499  |
| C  | 0.5079230  | 4.1011763  | 1.3689579  |
| C  | 1.4282880  | 3.0582863  | 1.3696729  |
| C  | 2.5580120  | 3.1648273  | 0.5468099  |
| C  | 1.1631240  | 1.7785063  | 2.1134509  |
| O  | 2.0501840  | 6.3261163  | -1.1216051 |
| C  | 1.1057140  | 7.3665733  | -1.1972371 |
| H  | 0.4277180  | 3.9806803  | -3.4047841 |
| H  | -1.5761650 | 3.5536223  | -4.7874141 |
| H  | -3.1144470 | 1.6571933  | -4.2443621 |

|   |            |            |            |
|---|------------|------------|------------|
| H | 0.9769100  | 2.5232283  | -1.4712061 |
| H | -3.4517400 | -0.5395727 | -2.4311671 |
| H | -2.3906470 | -1.3844557 | -0.4692391 |
| H | -1.0598490 | 1.9739453  | 0.6459449  |
| H | -0.4200890 | -0.8633507 | 2.4748779  |
| H | -0.3447490 | -1.2796647 | -3.1563781 |
| H | 0.4488240  | -2.8565747 | -3.1636341 |
| H | -0.9505270 | -2.5948787 | -2.1309111 |
| H | -0.8477940 | -3.2061917 | 3.1769419  |
| H | -1.9558070 | -3.2704287 | 4.5589859  |
| H | -0.6261480 | -2.0972337 | 4.5589889  |
| H | -3.6383670 | 0.0112963  | 3.8325339  |
| H | -3.6476540 | -1.3895357 | 4.9268629  |
| H | -2.2863440 | -0.2463447 | 4.9656299  |
| H | -3.9888820 | -1.5938057 | 1.8982369  |
| H | -3.8878200 | -3.0079377 | 2.9631599  |
| H | -2.8005670 | -2.8738027 | 1.5690099  |
| H | 3.6134550  | 4.3684153  | -0.9070241 |
| H | -0.0679990 | 6.0118663  | 0.5744799  |
| H | -0.3709360 | 4.0413483  | 2.0117689  |
| H | 3.2810320  | 2.3497273  | 0.5339999  |
| H | 2.0892480  | 1.3388073  | 2.5000139  |
| H | 0.4768210  | 1.9374743  | 2.9570689  |
| H | 1.4815470  | 8.0745623  | -1.9383861 |
| H | 0.9923470  | 7.8844343  | -0.2342301 |
| H | 0.1217660  | 6.9961793  | -1.5200161 |
| P | 4.7556950  | -3.6058397 | -0.5126951 |

|               |            |            |            |
|---------------|------------|------------|------------|
| C             | 5.6001170  | -2.6172387 | 0.7721729  |
| H             | 4.9509660  | -2.5481817 | 1.6508739  |
| H             | 6.5636520  | -3.0591037 | 1.0530919  |
| H             | 5.7520000  | -1.6005367 | 0.3961699  |
| C             | 6.0035000  | -3.7389577 | -1.8433661 |
| H             | 6.9477720  | -4.1388007 | -1.4546131 |
| H             | 5.6288310  | -4.3965337 | -2.6336151 |
| H             | 6.1788180  | -2.7493207 | -2.2761931 |
| C             | 4.7162660  | -5.2909647 | 0.1970909  |
| H             | 5.7226960  | -5.6178927 | 0.4849429  |
| H             | 4.0662180  | -5.2974987 | 1.0773779  |
| H             | 4.3029810  | -5.9892617 | -0.5369401 |
| C             | -5.6742040 | -2.0651357 | -0.5901901 |
| F             | -5.0750970 | -0.9710297 | -0.1004961 |
| F             | -5.8046200 | -2.9451987 | 0.3956749  |
| F             | -6.8786620 | -1.7236177 | -1.0211211 |
| S             | -4.6534690 | -2.7538787 | -1.9482251 |
| O             | -4.5637360 | -1.5777397 | -2.8661811 |
| O             | -5.4018500 | -3.8853927 | -2.4642771 |
| O             | -3.3743260 | -3.0369847 | -1.2660941 |
| <b>C-int1</b> |            |            |            |
| C             | -1.0237251 | -3.4055863 | -1.1106368 |
| C             | 0.1845279  | -3.9263923 | -0.6477238 |
| C             | 1.1562189  | -3.1044023 | -0.0755388 |
| C             | 0.8433879  | -1.7591553 | 0.0009432  |
| C             | -0.3530681 | -1.2127323 | -0.4609508 |
| C             | -1.3062341 | -2.0399623 | -1.0264308 |

|    |            |            |            |
|----|------------|------------|------------|
| N  | 1.6309849  | -0.7013083 | 0.5239112  |
| C  | 1.0195249  | 0.4332647  | 0.4165672  |
| C  | -0.3459301 | 0.2761567  | -0.1812578 |
| C  | -1.4960881 | 0.6588247  | 0.8105582  |
| N  | -2.5448691 | 1.1268397  | -0.0559938 |
| C  | -2.1077801 | 1.4500317  | -1.3358738 |
| C  | -0.6490481 | 1.1658617  | -1.3850298 |
| O  | -2.8585521 | 1.8613497  | -2.2044958 |
| C  | -1.0065931 | 1.6809737  | 1.8424672  |
| O  | -0.1113631 | 1.3455987  | 2.6123902  |
| N  | -1.5986231 | 2.8875457  | 1.8036142  |
| C  | 0.2354999  | 1.5352627  | -2.3372168 |
| Au | 2.2253579  | 0.9211247  | -2.3480028 |
| C  | -0.1774661 | 2.3917727  | -3.4950638 |
| C  | -1.2072871 | 4.0499387  | 2.6289562  |
| C  | -2.1244311 | 5.1937467  | 2.2189052  |
| C  | -1.4049901 | 3.7230687  | 4.1051202  |
| C  | 0.2467419  | 4.4158597  | 2.3428702  |
| C  | -4.9573701 | -2.2096903 | -1.6156378 |
| C  | -4.9088521 | -3.1742863 | -0.6010528 |
| C  | -4.6296951 | -2.7879923 | 0.7093862  |
| C  | -4.3747421 | -1.4454703 | 0.9853042  |
| C  | -4.3892031 | -0.4820853 | -0.0178318 |
| C  | -4.6987401 | -0.8820963 | -1.3249448 |
| C  | -3.9597521 | 0.9326697  | 0.2490592  |
| O  | -5.1422851 | -4.4494753 | -0.9924078 |
| C  | -5.0765361 | -5.4588443 | -0.0140768 |

|   |            |            |            |
|---|------------|------------|------------|
| H | -1.7655581 | -4.0691543 | -1.5512388 |
| H | 0.3771739  | -4.9928123 | -0.7331168 |
| H | 2.1103009  | -3.4743853 | 0.2924742  |
| H | -2.2534291 | -1.6481413 | -1.3934458 |
| H | 2.6242159  | -0.7548153 | 0.8748472  |
| H | 1.4958959  | 1.3590467  | 0.7233982  |
| H | -1.8057401 | -0.2320533 | 1.3769542  |
| H | -2.2584571 | 3.0339227  | 1.0481232  |
| H | -1.2172841 | 2.7275197  | -3.4536828 |
| H | 0.4899599  | 3.2598547  | -3.5720568 |
| H | -0.0334871 | 1.8282187  | -4.4271858 |
| H | -1.9983971 | 5.4437027  | 1.1573522  |
| H | -1.8893951 | 6.0893967  | 2.8039342  |
| H | -3.1770041 | 4.9398407  | 2.3976052  |
| H | -0.7767901 | 2.8793797  | 4.4044412  |
| H | -1.1373211 | 4.5936847  | 4.7158152  |
| H | -2.4533561 | 3.4720847  | 4.3064772  |
| H | 0.9171749  | 3.6022727  | 2.6354542  |
| H | 0.5252859  | 5.3129447  | 2.9087512  |
| H | 0.3874969  | 4.6266327  | 1.2751352  |
| H | -5.1943331 | -2.5370063 | -2.6248758 |
| H | -4.6011411 | -3.5145963 | 1.5156502  |
| H | -4.1550401 | -1.1492753 | 2.0116882  |
| H | -4.7048191 | -0.1355603 | -2.1184018 |
| H | -4.5072321 | 1.6383167  | -0.3866008 |
| H | -4.1286791 | 1.2106607  | 1.2990332  |
| H | -5.2727841 | -6.4022753 | -0.5270668 |

|              |            |            |            |
|--------------|------------|------------|------------|
| H            | -5.8329181 | -5.3148423 | 0.7705492  |
| H            | -4.0825421 | -5.5044073 | 0.4545472  |
| P            | 4.4940779  | 0.1543147  | -2.4769678 |
| C            | 5.6913879  | 0.9410747  | -1.3522458 |
| H            | 5.3570809  | 0.8167707  | -0.3181298 |
| H            | 6.6757419  | 0.4713847  | -1.4579128 |
| H            | 5.7520189  | 2.0064267  | -1.5987118 |
| C            | 5.2297759  | 0.4273747  | -4.1321748 |
| H            | 6.2467309  | 0.0186017  | -4.1694428 |
| H            | 4.6151209  | -0.0603893 | -4.8953048 |
| H            | 5.2644909  | 1.4998227  | -4.3482408 |
| C            | 4.6495249  | -1.6505753 | -2.2571458 |
| H            | 5.7030409  | -1.9421453 | -2.1820358 |
| H            | 4.1397159  | -1.9844523 | -1.3474198 |
| H            | 4.1810149  | -2.1394893 | -3.1184208 |
| C            | 5.3596989  | -1.8454483 | 3.0296562  |
| F            | 6.0460859  | -2.9661303 | 3.2025642  |
| F            | 4.2410449  | -1.9122693 | 3.7426512  |
| F            | 6.0842079  | -0.8235783 | 3.4640002  |
| S            | 4.9600779  | -1.6285153 | 1.2545762  |
| O            | 6.2529369  | -1.5459213 | 0.5836482  |
| O            | 4.1772389  | -0.3524363 | 1.2428372  |
| O            | 4.1081669  | -2.7829823 | 0.9297782  |
| <b>C-ts2</b> |            |            |            |
| C            | 0.6538583  | -3.0287013 | 2.5428899  |
| C            | -0.5012617 | -2.7717993 | 3.2789069  |
| C            | -1.3178187 | -1.6785873 | 2.9828069  |

|    |            |            |            |
|----|------------|------------|------------|
| C  | -0.9320757 | -0.8765543 | 1.9235029  |
| C  | 0.2254223  | -1.1113753 | 1.1840809  |
| C  | 1.0317503  | -2.1919293 | 1.4897819  |
| N  | -1.6030837 | 0.2342467  | 1.3679739  |
| C  | -0.9013897 | 0.7685877  | 0.3820059  |
| C  | 0.3489803  | -0.0543853 | 0.1127489  |
| N  | 0.0910543  | 2.5180687  | 1.0685609  |
| C  | 1.4379783  | 2.0093437  | 1.1055889  |
| C  | 1.6501963  | 0.7626477  | 0.2625939  |
| O  | 2.2891933  | 2.4707837  | 1.8253779  |
| N  | 2.0462083  | 1.0785737  | -1.0845131 |
| C  | 1.4686053  | 0.2203937  | -2.0228991 |
| C  | 0.3670753  | -0.5082143 | -1.3502091 |
| O  | 1.8667983  | 0.1598897  | -3.1737171 |
| C  | -0.5451777 | -1.3314673 | -1.9171691 |
| C  | -0.4840487 | -1.6845443 | -3.3718001 |
| Au | -2.2028067 | -2.1130033 | -0.9248031 |
| C  | 6.1603323  | 0.1797987  | 0.7244859  |
| C  | 6.5960423  | -0.8508823 | -0.1127801 |
| C  | 5.9754563  | -1.0512843 | -1.3474011 |
| C  | 4.9323693  | -0.2148523 | -1.7340401 |
| C  | 4.4967383  | 0.8235797  | -0.9126851 |
| C  | 5.1216093  | 1.0048747  | 0.3257359  |
| C  | 3.3449013  | 1.6910977  | -1.3406071 |
| O  | 7.6218413  | -1.6001763 | 0.3614109  |
| C  | 8.1065513  | -2.6395353 | -0.4514821 |
| C  | -0.2325637 | 3.7751257  | 0.2761089  |

|   |            |            |            |
|---|------------|------------|------------|
| C | -1.6894657 | 4.0901087  | 0.5900979  |
| C | -0.0439277 | 3.5452777  | -1.2151031 |
| C | 0.6698113  | 4.9100417  | 0.7488529  |
| H | 1.2686363  | -3.8895753 | 2.7922749  |
| H | -0.7695817 | -3.4284723 | 4.1029409  |
| H | -2.2127097 | -1.4613613 | 3.5615239  |
| H | 1.9283363  | -2.3948043 | 0.9057479  |
| H | -2.6054567 | 0.4798797  | 1.4824959  |
| H | -1.4346007 | 1.3438197  | -0.3712161 |
| H | 2.4334623  | 0.1755647  | 0.7750799  |
| H | -0.4632667 | -2.7771103 | -3.4806781 |
| H | 0.3660333  | -1.2496853 | -3.9029541 |
| H | -1.4160607 | -1.3617683 | -3.8555361 |
| H | 6.6578803  | 0.3106487  | 1.6820919  |
| H | 6.2967853  | -1.8460473 | -2.0141611 |
| H | 4.4403933  | -0.3693383 | -2.6937421 |
| H | 4.7768223  | 1.7999017  | 0.9873569  |
| H | 3.3811563  | 2.6633187  | -0.8271021 |
| H | 3.3707143  | 1.8759827  | -2.4203991 |
| H | 8.9245563  | -3.1093193 | 0.0985919  |
| H | 8.4910243  | -2.2616723 | -1.4098481 |
| H | 7.3326863  | -3.3941613 | -0.6540141 |
| H | -1.8370127 | 4.2559087  | 1.6657289  |
| H | -2.3676727 | 3.2971197  | 0.2553789  |
| H | -1.9808977 | 5.0110317  | 0.0724529  |
| H | 0.9904923  | 3.2851317  | -1.4654551 |
| H | -0.7051567 | 2.7678407  | -1.6144201 |



|   |            |            |            |
|---|------------|------------|------------|
| H | -0.2929897 | 4.4756867  | -1.7376721 |
| H | 1.7244613  | 4.7169557  | 0.5231369  |
| H | 0.5801203  | 5.0690307  | 1.8306539  |
| H | 0.3780803  | 5.8384187  | 0.2438529  |
| P | -4.1651877 | -3.0324993 | 0.0836239  |
| C | -4.8163597 | -2.1941313 | 1.5686139  |
| H | -5.7238177 | -2.6997013 | 1.9209339  |
| H | -4.0563147 | -2.2306163 | 2.3569649  |
| H | -5.0373107 | -1.1488813 | 1.3289229  |
| C | -5.6057737 | -3.1540213 | -1.0287561 |
| H | -5.3374427 | -3.7392943 | -1.9138121 |
| H | -6.4492897 | -3.6315413 | -0.5155891 |
| H | -5.8765697 | -2.1390863 | -1.3353421 |
| C | -3.9120337 | -4.7510533 | 0.6681869  |
| H | -3.1078147 | -4.7607303 | 1.4120889  |
| H | -4.8281287 | -5.1557323 | 1.1155299  |
| H | -3.6081117 | -5.3842113 | -0.1714451 |
| C | -5.6606937 | 2.5153777  | -0.5251841 |
| F | -5.1114417 | 3.6420577  | -0.0795241 |
| F | -6.7368877 | 2.2486057  | 0.2027429  |
| F | -6.0262417 | 2.6879807  | -1.7868321 |
| S | -4.4511187 | 1.1440397  | -0.4039221 |
| O | -3.3128517 | 1.6187577  | -1.2083981 |
| O | -5.1646537 | -0.0301723 | -0.9115971 |
| O | -4.1680247 | 1.1006057  | 1.0573739  |
| H | -0.1493187 | 2.7361737  | 2.0390089  |

**C-int2**

|    |            |            |            |
|----|------------|------------|------------|
| C  | -0.6087146 | -3.3489648 | -1.9186052 |
| C  | 0.3995814  | -3.1297738 | -2.8567562 |
| C  | 1.0948564  | -1.9211138 | -2.9040242 |
| C  | 0.7630404  | -0.9418568 | -1.9753352 |
| C  | -0.2439206 | -1.1550088 | -1.0346982 |
| C  | -0.9405126 | -2.3509588 | -1.0021992 |
| N  | 1.3398274  | 0.3350322  | -1.8412662 |
| C  | 0.7518424  | 0.9767572  | -0.7012772 |
| C  | -0.3906016 | 0.0558172  | -0.1531002 |
| N  | 0.0808124  | 2.2775982  | -1.1832412 |
| C  | -1.4051516 | 1.9744362  | -1.2820692 |
| C  | -1.7127106 | 0.8061782  | -0.3935642 |
| O  | -2.1128546 | 2.6152032  | -1.9957882 |
| N  | -2.0825126 | 1.3333802  | 0.8950558  |
| C  | -1.4203886 | 0.6705902  | 1.9487848  |
| C  | -0.3432556 | -0.1392418 | 1.3545628  |
| O  | -1.7700516 | 0.8266002  | 3.1057708  |
| C  | 0.6015514  | -0.8609428 | 2.0044328  |
| C  | 0.6738534  | -0.9043398 | 3.4971398  |
| Au | 2.1193224  | -1.8767498 | 1.0059258  |
| C  | -6.2393596 | 0.1414102  | -0.6576962 |
| C  | -6.5551406 | -0.8476788 | 0.2778128  |
| C  | -5.8485876 | -0.9164098 | 1.4807998  |
| C  | -4.8385526 | 0.0055022  | 1.7362388  |
| C  | -4.5200016 | 1.0016832  | 0.8145688  |
| C  | -5.2309236 | 1.0525442  | -0.3880342 |
| C  | -3.3881106 | 1.9494992  | 1.0971488  |

|   |            |            |            |
|---|------------|------------|------------|
| O | -7.5563576 | -1.6907928 | -0.0726392 |
| C | -7.9160586 | -2.6991448 | 0.8391688  |
| C | 0.5392414  | 3.6083022  | -0.4829292 |
| C | 1.9571634  | 3.8374362  | -0.9838942 |
| C | 0.4809954  | 3.4570662  | 1.0250468  |
| C | -0.3782826 | 4.7252572  | -0.9502822 |
| H | -1.1382856 | -4.2979248 | -1.9038632 |
| H | 0.6432734  | -3.9102148 | -3.5749842 |
| H | 1.8649774  | -1.7412258 | -3.6515882 |
| H | -1.7117946 | -2.5113868 | -0.2493992 |
| H | 2.3648994  | 0.3794082  | -1.8052222 |
| H | 1.4933474  | 1.2404202  | 0.0599848  |
| H | -2.5088816 | 0.1936222  | -0.8480382 |
| H | 0.7440034  | -1.9437598 | 3.8423688  |
| H | -0.1542206 | -0.4024608 | 4.0045838  |
| H | 1.6198634  | -0.4313548 | 3.7986608  |
| H | -6.8025616 | 0.1701682  | -1.5869412 |
| H | -6.0782276 | -1.6758088 | 2.2224158  |
| H | -4.2810526 | -0.0452098 | 2.6711898  |
| H | -4.9838596 | 1.8193952  | -1.1231652 |
| H | -3.4644626 | 2.8451292  | 0.4628538  |
| H | -3.3918476 | 2.2737082  | 2.1442068  |
| H | -8.7301486 | -3.2607138 | 0.3764968  |
| H | -8.2679276 | -2.2792838 | 1.7924458  |
| H | -7.0792826 | -3.3833868 | 1.0409248  |
| H | 1.9604954  | 4.0755232  | -2.0562772 |
| H | 2.6224794  | 2.9851462  | -0.8099152 |

|   |            |            |            |
|---|------------|------------|------------|
| H | 2.3826234  | 4.6947542  | -0.4512792 |
| H | -0.5306946 | 3.2175292  | 1.3718818  |
| H | 1.1924174  | 2.7179332  | 1.4091178  |
| H | 0.7616804  | 4.4247122  | 1.4560948  |
| H | -1.3902196 | 4.6342062  | -0.5416982 |
| H | -0.4487816 | 4.7795592  | -2.0425002 |
| H | 0.0436294  | 5.6704702  | -0.5915132 |
| P | 3.8837234  | -3.0474078 | -0.0960862 |
| C | 4.5823134  | -2.2502088 | -1.5828952 |
| H | 5.3910624  | -2.8635108 | -1.9990062 |
| H | 3.7899404  | -2.1389988 | -2.3317752 |
| H | 4.9556194  | -1.2583238 | -1.3114792 |
| C | 5.3460204  | -3.3837478 | 0.9433978  |
| H | 5.0479234  | -3.9682388 | 1.8194398  |
| H | 6.1079364  | -3.9339728 | 0.3779508  |
| H | 5.7446394  | -2.4204458 | 1.2753258  |
| C | 3.3922794  | -4.7011648 | -0.7163072 |
| H | 2.5620954  | -4.5826268 | -1.4227472 |
| H | 4.2304234  | -5.2028368 | -1.2155342 |
| H | 3.0453554  | -5.3181428 | 0.1188118  |
| C | 5.5385384  | 2.3260752  | 0.6407488  |
| F | 5.0131604  | 3.4857132  | 0.2433278  |
| F | 6.5846034  | 2.0530702  | -0.1282582 |
| F | 5.9486564  | 2.4559392  | 1.8940778  |
| S | 4.2841434  | 0.9931782  | 0.5166298  |
| O | 3.1929864  | 1.4726262  | 1.3807018  |
| O | 4.9982934  | -0.2065128 | 0.9635208  |

|              |            |            |            |
|--------------|------------|------------|------------|
| O            | 3.9470874  | 1.0059702  | -0.9298222 |
| H            | 0.3817174  | 2.3772922  | -2.1619212 |
| <b>C-ts3</b> |            |            |            |
| C            | 0.1574378  | -2.7710324 | 2.4636743  |
| C            | -0.9131112 | -2.2846434 | 3.2167913  |
| C            | -1.4926922 | -1.0514234 | 2.9249053  |
| C            | -0.9727162 | -0.3382294 | 1.8557413  |
| C            | 0.0846088  | -0.8135964 | 1.0884393  |
| C            | 0.6653438  | -2.0357294 | 1.3944963  |
| N            | -1.4216562 | 0.9357366  | 1.3986743  |
| C            | -0.6571172 | 1.2492026  | 0.1656893  |
| C            | 0.4129248  | 0.1435136  | -0.0257107 |
| N            | 0.0242308  | 2.4832736  | 0.6973413  |
| C            | 1.4607488  | 2.2082656  | 0.7969893  |
| C            | 1.7539078  | 0.8663196  | 0.1650253  |
| O            | 2.2531328  | 2.9719536  | 1.2739973  |
| N            | 2.2135758  | 1.1198856  | -1.1811127 |
| C            | 1.6114738  | 0.2595716  | -2.1145537 |
| C            | 0.4626518  | -0.3888894 | -1.4476107 |
| O            | 2.0429438  | 0.1450946  | -3.2488097 |
| C            | -0.4544842 | -1.2210024 | -1.9936977 |
| C            | -0.3833402 | -1.6322084 | -3.4317887 |
| Au           | -2.0716002 | -2.0041544 | -0.9330737 |
| C            | 6.2185748  | 0.1284236  | 0.8285203  |
| C            | 6.5869658  | -1.0035424 | 0.0960683  |
| C            | 5.9712048  | -1.2686454 | -1.1288967 |
| C            | 4.9997538  | -0.3966074 | -1.6107547 |

|   |            |            |            |
|---|------------|------------|------------|
| C | 4.6319418  | 0.7414756  | -0.8950897 |
| C | 5.2505338  | 0.9879036  | 0.3345083  |
| C | 3.5530008  | 1.6474206  | -1.4195887 |
| O | 7.5466318  | -1.7805494 | 0.6562393  |
| C | 7.9648298  | -2.9202214 | -0.0525887 |
| C | -0.4345872 | 3.8572596  | 0.1916253  |
| C | -1.9578272 | 3.8765736  | 0.1954153  |
| C | 0.1124478  | 4.0430136  | -1.2141577 |
| C | 0.0816818  | 4.9254206  | 1.1462803  |
| H | 0.5951568  | -3.7348584 | 2.7113763  |
| H | -1.2993822 | -2.8733434 | 4.0461183  |
| H | -2.3282512 | -0.6584744 | 3.5005953  |
| H | 1.4806538  | -2.4196534 | 0.7832173  |
| H | -2.4602472 | 1.0003446  | 1.2965553  |
| H | -1.3014662 | 1.4195316  | -0.7008417 |
| H | 2.4941358  | 0.3112556  | 0.7652023  |
| H | -0.3523082 | -2.7280084 | -3.4987527 |
| H | 0.4664718  | -1.2121544 | -3.9763517 |
| H | -1.3164592 | -1.3383214 | -3.9312507 |
| H | 6.7119838  | 0.3091116  | 1.7801593  |
| H | 6.2424058  | -2.1421174 | -1.7146047 |
| H | 4.5125758  | -0.5996044 | -2.5640197 |
| H | 4.9600218  | 1.8684566  | 0.9088913  |
| H | 3.6309338  | 2.6426036  | -0.9618177 |
| H | 3.6275868  | 1.7625816  | -2.5064057 |
| H | 8.7391628  | -3.3963934 | 0.5524063  |
| H | 8.3880508  | -2.6574014 | -1.0328067 |

|   |            |            |            |
|---|------------|------------|------------|
| H | 7.1406518  | -3.6325794 | -0.2029737 |
| H | -2.3678372 | 3.6913726  | 1.1969233  |
| H | -2.4107002 | 3.1631356  | -0.5011787 |
| H | -2.2849402 | 4.8772716  | -0.1077527 |
| H | 1.2090098  | 4.0493086  | -1.2248087 |
| H | -0.2400692 | 3.2576886  | -1.8939157 |
| H | -0.2334772 | 5.0046546  | -1.6095207 |
| H | 1.1700248  | 5.0008496  | 1.1485123  |
| H | -0.2553552 | 4.7286826  | 2.1713443  |
| H | -0.3366752 | 5.8894696  | 0.8358383  |
| P | -3.8806382 | -3.1242224 | 0.1661523  |
| C | -4.6918762 | -2.3962204 | 1.6304293  |
| H | -5.4476052 | -3.0909374 | 2.0174913  |
| H | -3.9384932 | -2.2074084 | 2.4022873  |
| H | -5.1545762 | -1.4469234 | 1.3479703  |
| C | -5.2714532 | -3.5492844 | -0.9371217 |
| H | -4.8969742 | -4.1155954 | -1.7957687 |
| H | -6.0215502 | -4.1456624 | -0.4035797 |
| H | -5.7157192 | -2.6140774 | -1.2896167 |
| C | -3.3213512 | -4.7541034 | 0.7973623  |
| H | -2.5347082 | -4.5965374 | 1.5442783  |
| H | -4.1507902 | -5.3093134 | 1.2525753  |
| H | -2.8990632 | -5.3406624 | -0.0250487 |
| C | -5.6913002 | 2.1936196  | -0.5641737 |
| F | -5.1202832 | 3.3370096  | -0.1844217 |
| F | -6.7496962 | 1.9756346  | 0.2042253  |
| F | -6.0886022 | 2.3160916  | -1.8217927 |

|   |            |            |            |
|---|------------|------------|------------|
| S | -4.4926792 | 0.8150466  | -0.4093667 |
| O | -3.3802062 | 1.2279866  | -1.2817577 |
| O | -5.2487792 | -0.3670314 | -0.8259177 |
| O | -4.1485142 | 0.8449196  | 1.0383993  |
| H | -0.6382112 | 2.0844276  | 1.6742653  |

**C-int3**

|    |            |            |            |
|----|------------|------------|------------|
| C  | 0.5421814  | -2.6793186 | 2.1090842  |
| C  | -0.4958586 | -2.2875796 | 2.9593762  |
| C  | -1.1669466 | -1.0851886 | 2.7512112  |
| C  | -0.7550386 | -0.3190406 | 1.6746462  |
| C  | 0.2509254  | -0.6928526 | 0.8058412  |
| C  | 0.9224524  | -1.8894536 | 1.0287332  |
| N  | -1.3444736 | 0.9532794  | 1.2754062  |
| C  | -0.6396996 | 1.3800174  | -0.0418198 |
| C  | 0.4493314  | 0.2988894  | -0.2995408 |
| N  | 0.0270484  | 2.6272614  | 0.1388932  |
| C  | 1.4051804  | 2.5045174  | 0.1429362  |
| C  | 1.7748274  | 1.0698614  | -0.1943598 |
| O  | 2.2057104  | 3.4028954  | 0.3116802  |
| N  | 2.3384614  | 1.0282464  | -1.5197948 |
| C  | 1.6518754  | 0.2079404  | -2.4027328 |
| C  | 0.4292884  | -0.2717876 | -1.7099908 |
| O  | 2.0686384  | -0.0455106 | -3.5220438 |
| C  | -0.5313436 | -1.0883556 | -2.1963398 |
| C  | -0.5176046 | -1.5566436 | -3.6202618 |
| Au | -2.0795586 | -1.8984526 | -1.0543328 |
| C  | 6.2000174  | 0.3792434  | 0.8730412  |



|   |            |            |            |
|---|------------|------------|------------|
| C | 6.4928694  | -0.9214966 | 0.4556592  |
| C | 5.8819434  | -1.4379686 | -0.6892358 |
| C | 4.9914724  | -0.6442046 | -1.4064028 |
| C | 4.7011824  | 0.6591094  | -1.0077838 |
| C | 5.3111424  | 1.1564084  | 0.1469562  |
| C | 3.6976434  | 1.4761324  | -1.7739318 |
| O | 7.3773254  | -1.6035516 | 1.2271672  |
| C | 7.7230994  | -2.9064946 | 0.8317582  |
| C | -0.6552926 | 3.9654224  | 0.1290502  |
| C | -2.1665166 | 3.7852034  | 0.0662742  |
| C | -0.1932116 | 4.7343534  | -1.1052608 |
| C | -0.2901356 | 4.7137694  | 1.4089442  |
| H | 1.0566444  | -3.6191376 | 2.2937362  |
| H | -0.7818086 | -2.9241886 | 3.7931852  |
| H | -1.9840266 | -0.7628036 | 3.3936952  |
| H | 1.7151514  | -2.1995426 | 0.3494762  |
| H | -2.4067346 | 0.8608254  | 1.1541162  |
| H | -1.4309966 | 1.3816404  | -0.7991978 |
| H | 2.4769934  | 0.6672554  | 0.5547982  |
| H | -0.4791096 | -2.6543556 | -3.6478538 |
| H | 0.3111564  | -1.1556836 | -4.2093588 |
| H | -1.4703826 | -1.2867756 | -4.0950208 |
| H | 6.6861944  | 0.7535804  | 1.7704782  |
| H | 6.0972874  | -2.4458006 | -1.0325308 |
| H | 4.5124684  | -1.0399986 | -2.3022448 |
| H | 5.0736004  | 2.1680504  | 0.4770302  |
| H | 3.7800184  | 2.5378384  | -1.5105798 |

|   |            |            |            |
|---|------------|------------|------------|
| H | 3.8389244  | 1.3703714  | -2.8556418 |
| H | 8.4461484  | -3.2730966 | 1.5635152  |
| H | 8.1858194  | -2.9209576 | -0.1657358 |
| H | 6.8511834  | -3.5771796 | 0.8254052  |
| H | -2.5793406 | 3.2564304  | 0.9359102  |
| H | -2.5061476 | 3.2648204  | -0.8354968 |
| H | -2.6273006 | 4.7791814  | 0.0641692  |
| H | 0.8870004  | 4.9020034  | -1.0872888 |
| H | -0.4535076 | 4.1833604  | -2.0168638 |
| H | -0.6947146 | 5.7085474  | -1.1408088 |
| H | 0.7895824  | 4.8581944  | 1.4917132  |
| H | -0.6432056 | 4.1703034  | 2.2963462  |
| H | -0.7787806 | 5.6951874  | 1.4083322  |
| P | -3.7177846 | -3.1877026 | 0.1355772  |
| C | -4.4097876 | -2.6261226 | 1.7308332  |
| H | -5.0862156 | -3.3915546 | 2.1308212  |
| H | -3.5894436 | -2.4623526 | 2.4379692  |
| H | -4.9463386 | -1.6859086 | 1.5811202  |
| C | -5.1862706 | -3.6585966 | -0.8414108 |
| H | -4.8649946 | -4.1371706 | -1.7719938 |
| H | -5.8221586 | -4.3500016 | -0.2752588 |
| H | -5.7410316 | -2.7471036 | -1.0803078 |
| C | -2.9765336 | -4.8038076 | 0.5905542  |
| H | -2.1237866 | -4.6278156 | 1.2564492  |
| H | -3.7063826 | -5.4498186 | 1.0939522  |
| H | -2.6076206 | -5.3048636 | -0.3102878 |
| C | -5.7780796 | 2.0301534  | -0.1048798 |

|              |            |            |            |
|--------------|------------|------------|------------|
| F            | -5.1571566 | 3.1680494  | 0.2002872  |
| F            | -6.6780906 | 1.7735674  | 0.8333502  |
| F            | -6.3919906 | 2.1778114  | -1.2677328 |
| S            | -4.5638076 | 0.6595194  | -0.2105888 |
| O            | -3.6059736 | 1.0962614  | -1.2330048 |
| O            | -5.3787246 | -0.5171026 | -0.5056508 |
| O            | -3.9707616 | 0.6526324  | 1.1668322  |
| H            | -1.1761176 | 1.6792064  | 1.9772592  |
| <b>C-ts4</b> |            |            |            |
| C            | -0.5553459 | -1.1271575 | 3.2460763  |
| C            | -1.8016689 | -0.5066245 | 3.2555943  |
| C            | -2.2185039 | 0.3070145  | 2.1964013  |
| C            | -1.3210029 | 0.4671695  | 1.1600643  |
| C            | -0.0669049 | -0.1396275 | 1.1304563  |
| C            | 0.3304431  | -0.9503335 | 2.1769463  |
| N            | -1.4781179 | 1.1836155  | -0.0718257 |
| C            | -0.1334299 | 1.6138405  | -0.4520577 |
| C            | 0.6177931  | 0.2810005  | -0.1412547 |
| N            | 0.6195911  | 2.5935955  | 0.3036503  |
| C            | 1.9510761  | 2.2011505  | 0.3307723  |
| C            | 2.0507281  | 0.7282525  | -0.0843037 |
| O            | 2.9091391  | 2.8965485  | 0.6079403  |
| N            | 2.4770031  | 0.5563185  | -1.4613857 |
| C            | 1.6493651  | -0.2661645 | -2.2134367 |
| C            | 0.4144171  | -0.5094915 | -1.3991967 |
| O            | 1.9150771  | -0.6744715 | -3.3297067 |
| C            | -0.8261539 | -0.8953885 | -1.7887287 |

|    |            |            |            |
|----|------------|------------|------------|
| C  | -1.1341719 | -1.2359985 | -3.2219657 |
| Au | -2.3050689 | -1.9473415 | -0.5642497 |
| C  | 6.4114431  | -0.3165125 | 0.6298753  |
| C  | 6.7168511  | -1.5859945 | 0.1302943  |
| C  | 6.0875831  | -2.0475695 | -1.0274087 |
| C  | 5.1642801  | -1.2313545 | -1.6750597 |
| C  | 4.8618781  | 0.0396575  | -1.1937127 |
| C  | 5.4931581  | 0.4852555  | -0.0276707 |
| C  | 3.8316571  | 0.8881215  | -1.8843217 |
| O  | 7.6324011  | -2.2926735 | 0.8388493  |
| C  | 7.9831531  | -3.5695815 | 0.3681233  |
| C  | 0.2317411  | 4.0343035  | 0.4084333  |
| C  | -1.2859899 | 4.1570855  | 0.3446403  |
| C  | 0.8608241  | 4.8182845  | -0.7401087 |
| C  | 0.7009961  | 4.5602605  | 1.7619113  |
| H  | -0.2606659 | -1.7515545 | 4.0860693  |
| H  | -2.4677879 | -0.6529045 | 4.1031453  |
| H  | -3.1981129 | 0.7796795  | 2.1706423  |
| H  | 1.3054391  | -1.4334185 | 2.1761193  |
| H  | -1.5451689 | 0.1516045  | -0.9688337 |
| H  | -0.1576369 | 1.8651005  | -1.5233387 |
| H  | 2.7060351  | 0.1864445  | 0.6158883  |
| H  | -1.2289289 | -2.3223695 | -3.3537497 |
| H  | -0.3569499 | -0.8904125 | -3.9120917 |
| H  | -2.1048379 | -0.8070305 | -3.4976297 |
| H  | 6.9145381  | 0.0149115  | 1.5347603  |
| H  | 6.3098211  | -3.0304075 | -1.4326397 |

|   |            |            |            |
|---|------------|------------|------------|
| H | 4.6653101  | -1.5878095 | -2.5762247 |
| H | 5.2440081  | 1.4713345  | 0.3663063  |
| H | 4.0065701  | 1.9519165  | -1.6791267 |
| H | 3.8503461  | 0.7329395  | -2.9687357 |
| H | 8.7285231  | -3.9636795 | 1.0620713  |
| H | 8.4209871  | -3.5263345 | -0.6396667 |
| H | 7.1187781  | -4.2493715 | 0.3487763  |
| H | -1.7806599 | 3.5794975  | 1.1359243  |
| H | -1.6994909 | 3.8596595  | -0.6273057 |
| H | -1.5543859 | 5.2090395  | 0.4907983  |
| H | 1.9527271  | 4.7743685  | -0.6946757 |
| H | 0.5292811  | 4.4262935  | -1.7106097 |
| H | 0.5543311  | 5.8695675  | -0.6839727 |
| H | 1.7877731  | 4.5133315  | 1.8567903  |
| H | 0.2479821  | 3.9751745  | 2.5711503  |
| H | 0.3826581  | 5.6035965  | 1.8731713  |
| P | -3.9631709 | -3.2620865 | 0.4504303  |
| C | -4.3429339 | -2.8353945 | 2.1801663  |
| H | -5.1278909 | -3.4953685 | 2.5688673  |
| H | -3.4387429 | -2.9332155 | 2.7898583  |
| H | -4.6840259 | -1.7951205 | 2.1971763  |
| C | -5.5628929 | -3.1507395 | -0.4136517 |
| H | -5.4390259 | -3.4520605 | -1.4581617 |
| H | -6.3046599 | -3.7958105 | 0.0727213  |
| H | -5.8914249 | -2.1070275 | -0.3775307 |
| C | -3.6003069 | -5.0540595 | 0.5020673  |
| H | -2.6869379 | -5.2275775 | 1.0793553  |

|            |            |            |            |
|------------|------------|------------|------------|
| H          | -4.4310549 | -5.6025375 | 0.9621893  |
| H          | -3.4413199 | -5.4258955 | -0.5149027 |
| C          | -6.3810449 | 1.4313085  | -1.0145617 |
| F          | -6.1781049 | 2.2975545  | -1.9969727 |
| F          | -7.0736079 | 2.0241875  | -0.0524587 |
| F          | -7.0888789 | 0.4075355  | -1.4836427 |
| S          | -4.7832789 | 0.8142045  | -0.3644977 |
| O          | -4.1378189 | 0.1896925  | -1.5308407 |
| O          | -5.1854379 | -0.1162725 | 0.7038133  |
| O          | -4.0983339 | 2.0376955  | 0.1187543  |
| H          | -2.3138309 | 1.7866335  | -0.1548237 |
| <b>C-2</b> |            |            |            |
| C          | 0.6764961  | -2.6914954 | -1.8722822 |
| C          | 1.3283031  | -2.0113574 | -2.9429912 |
| C          | 1.3874201  | -0.6308744 | -3.0005812 |
| C          | 0.7532751  | 0.0984816  | -1.9855762 |
| C          | 0.0523141  | -0.5469984 | -0.9474382 |
| C          | -0.0065899 | -1.9159944 | -0.8855422 |
| N          | 0.7367051  | 1.4505016  | -1.8372552 |
| C          | 0.1813651  | 1.8018386  | -0.5235502 |
| C          | -0.4681129 | 0.4888886  | 0.0071408  |
| N          | -0.8900259 | 2.7737686  | -0.5815722 |
| C          | -2.1298119 | 2.1990096  | -0.5417672 |
| C          | -1.9816259 | 0.7481256  | -0.0987362 |
| O          | -3.2058709 | 2.7307976  | -0.7617162 |
| N          | -2.4909149 | 0.5718106  | 1.2432398  |
| C          | -1.5460249 | 0.2205126  | 2.1762828  |

|    |            |            |            |
|----|------------|------------|------------|
| C  | -0.2357069 | 0.2035266  | 1.4738098  |
| O  | -1.7884419 | -0.0311604 | 3.3470198  |
| C  | 0.9656141  | -0.0191804 | 2.0221618  |
| C  | 1.2537761  | -0.2741804 | 3.4591738  |
| Au | 2.6189621  | -2.7637344 | -0.6848002 |
| C  | -6.0259549 | -1.2597564 | -0.9831702 |
| C  | -6.0115609 | -2.5494314 | -0.4452452 |
| C  | -5.3185739 | -2.8008104 | 0.7408588  |
| C  | -4.6535139 | -1.7560954 | 1.3768298  |
| C  | -4.6719409 | -0.4644694 | 0.8577058  |
| C  | -5.3608209 | -0.2308834 | -0.3360462 |
| C  | -3.9123139 | 0.6374956  | 1.5410308  |
| O  | -6.6956279 | -3.4886494 | -1.1471362 |
| C  | -6.7239729 | -4.7966284 | -0.6363012 |
| C  | -0.6630079 | 4.1971686  | -0.9614152 |
| C  | 0.7932481  | 4.5699566  | -0.6992282 |
| C  | -1.5432629 | 5.0959996  | -0.0946802 |
| C  | -1.0008059 | 4.3756346  | -2.4395312 |
| H  | 0.4514661  | -3.7528954 | -1.9718172 |
| H  | 1.7953611  | -2.6038854 | -3.7268152 |
| H  | 1.9369101  | -0.1177514 | -3.7851132 |
| H  | -0.5399569 | -2.4131504 | -0.0757712 |
| H  | 0.9872561  | 2.1523786  | 0.1288808  |
| H  | -2.5050209 | 0.0866336  | -0.8067182 |
| H  | 1.6475211  | -1.2922254 | 3.5917178  |
| H  | 0.3642271  | -0.1645474 | 4.0820028  |
| H  | 2.0429591  | 0.4067966  | 3.8050358  |

|   |            |            |            |
|---|------------|------------|------------|
| H | -6.5691819 | -1.0949724 | -1.9102792 |
| H | -5.2964969 | -3.7954404 | 1.1768908  |
| H | -4.1082719 | -1.9436774 | 2.3025578  |
| H | -5.3589829 | 0.7742066  | -0.7587012 |
| H | -4.2936089 | 1.6182126  | 1.2313718  |
| H | -3.9851719 | 0.5577186  | 2.6317938  |
| H | -7.3212379 | -5.3904674 | -1.3315182 |
| H | -7.1902769 | -4.8362944 | 0.3589678  |
| H | -5.7158099 | -5.2319144 | -0.5705522 |
| H | 1.5172161  | 3.9909336  | -1.2848442 |
| H | 1.0493431  | 4.4647216  | 0.3618998  |
| H | 0.9302971  | 5.6228836  | -0.9697162 |
| H | -2.6043139 | 4.9034916  | -0.2641622 |
| H | -1.3214569 | 4.9375396  | 0.9675898  |
| H | -1.3310549 | 6.1446976  | -0.3349192 |
| H | -2.0479989 | 4.1165646  | -2.6264022 |
| H | -0.3636009 | 3.7393896  | -3.0644122 |
| H | -0.8441729 | 5.4201636  | -2.7359632 |
| P | 4.6175811  | -2.8078954 | 0.5175898  |
| C | 6.0447181  | -2.2105204 | -0.4341212 |
| H | 6.9494681  | -2.2714384 | 0.1830128  |
| H | 6.1727551  | -2.8264534 | -1.3295152 |
| H | 5.8739841  | -1.1663594 | -0.7311602 |
| C | 4.5752051  | -1.7799574 | 2.0171098  |
| H | 3.8015521  | -2.1501914 | 2.6976058  |
| H | 5.5494491  | -1.8064114 | 2.5195008  |
| H | 4.3352461  | -0.7536694 | 1.7224158  |



|            |           |            |            |
|------------|-----------|------------|------------|
| C          | 5.1067331 | -4.4651784 | 1.1093418  |
| H          | 5.2322861 | -5.1391244 | 0.2564128  |
| H          | 6.0503101 | -4.4065064 | 1.6649098  |
| H          | 4.3273591 | -4.8712104 | 1.7614418  |
| C          | 4.1949331 | 2.2966296  | 0.7844468  |
| F          | 2.9723491 | 2.6881496  | 1.1551618  |
| F          | 4.9456611 | 3.3693726  | 0.6084728  |
| F          | 4.7057921 | 1.5758036  | 1.7853678  |
| S          | 4.1144251 | 1.2857656  | -0.7475082 |
| O          | 3.2635731 | 0.1478626  | -0.3226582 |
| O          | 5.5107191 | 0.9370536  | -1.0089182 |
| O          | 3.4734321 | 2.1914066  | -1.7165542 |
| H          | 1.6047261 | 1.9266046  | -2.0989632 |
| H          | 1.8288001 | 0.0053386  | 1.3469108  |
| <b>D-1</b> |           |            |            |
| C          | 3.9727988 | 1.7439792  | 0.9055141  |
| C          | 3.4206348 | 2.2849962  | 2.0789231  |
| C          | 2.1836798 | 1.8699292  | 2.5444601  |
| C          | 1.5043618 | 0.9061862  | 1.7972311  |
| C          | 2.0322218 | 0.3647382  | 0.5964421  |
| C          | 3.2957218 | 0.7924822  | 0.1620791  |
| N          | 0.2829288 | 0.3185462  | 2.0225561  |
| C          | 0.0251728 | -0.5711178 | 1.0220841  |
| C          | 1.0546738 | -0.5733138 | 0.1092781  |
| O          | 3.1337698 | -1.3967608 | -2.3664979 |
| C          | 2.4733418 | -1.9004988 | -1.4670059 |
| C          | 1.0614978 | -1.4330668 | -1.1213799 |

|   |            |            |            |
|---|------------|------------|------------|
| N | 3.0154608  | -2.9160508 | -0.7306859 |
| N | 0.3516678  | -0.8803068 | -2.3013419 |
| C | -0.9275362 | -1.2499828 | -2.5703779 |
| C | -1.5902452 | -2.1257048 | -1.5756529 |
| C | -2.1999662 | -2.9136298 | -0.8567509 |
| C | -2.7922172 | -3.8990388 | 0.0310661  |
| O | -1.5965642 | -0.8707118 | -3.5229649 |
| C | 2.6874498  | -3.6747238 | 0.4999381  |
| C | 3.5473508  | -4.9355578 | 0.4166581  |
| C | 3.0762478  | -2.8779768 | 1.7435641  |
| C | 1.2236498  | -4.1011688 | 0.5768141  |
| C | 0.3170368  | 3.1194072  | -0.7393759 |
| C | 1.5041508  | 3.8372402  | -0.9041809 |
| C | 2.4382528  | 3.4184102  | -1.8520909 |
| C | 2.2209058  | 2.2521292  | -2.5664939 |
| C | 1.0590188  | 1.4999962  | -2.3874839 |
| C | 0.1004028  | 1.9710042  | -1.4938809 |
| C | 0.8898018  | 0.2077732  | -3.1377199 |
| O | 1.8392578  | 4.9376602  | -0.1850789 |
| C | 1.0559848  | 5.2381282  | 0.9426091  |
| H | 4.9473428  | 2.0908582  | 0.5687341  |
| H | 3.9775318  | 3.0361872  | 2.6348891  |
| H | 1.7564898  | 2.2703212  | 3.4619161  |
| H | 3.7245288  | 0.3977262  | -0.7571869 |
| H | -0.3513902 | 0.4377852  | 2.8082051  |
| H | -0.8885532 | -1.1553928 | 1.0531131  |
| H | 0.4955808  | -2.3346598 | -0.8776699 |

|    |            |            |            |
|----|------------|------------|------------|
| H  | 3.9769188  | -3.0406278 | -1.0323729 |
| H  | -3.7800112 | -4.2119768 | -0.3217769 |
| H  | -2.8931952 | -3.4670648 | 1.0331521  |
| H  | -2.1441842 | -4.7808388 | 0.0860531  |
| H  | 3.2840008  | -5.5329638 | -0.4642799 |
| H  | 3.4044308  | -5.5511508 | 1.3115621  |
| H  | 4.6139818  | -4.6816098 | 0.3582311  |
| H  | 2.4744568  | -1.9688308 | 1.8401121  |
| H  | 2.9292688  | -3.4882148 | 2.6436391  |
| H  | 4.1318208  | -2.5837098 | 1.6967331  |
| H  | 1.1199828  | -4.8568278 | 1.3645161  |
| H  | 0.8914318  | -4.5505038 | -0.3686919 |
| H  | 0.5609518  | -3.2715708 | 0.8478001  |
| H  | -0.4228202 | 3.4238072  | -0.0034069 |
| H  | 3.3554878  | 3.9919302  | -1.9600199 |
| H  | 2.9854768  | 1.8906852  | -3.2540609 |
| H  | -0.8137052 | 1.3950912  | -1.3274709 |
| H  | 0.1754658  | 0.3153732  | -3.9600069 |
| H  | 1.8469178  | -0.1163608 | -3.5486589 |
| H  | 1.5351998  | 6.0856852  | 1.4380051  |
| H  | 1.0171358  | 4.3857772  | 1.6388451  |
| H  | 0.0300078  | 5.5256492  | 0.6681811  |
| Au | -3.2587342 | -0.6808218 | -0.7557679 |
| P  | -4.5640372 | 1.2267282  | -0.5121679 |
| C  | -3.5509222 | 2.7181052  | -0.2698639 |
| H  | -2.8846462 | 2.8557432  | -1.1287389 |
| H  | -4.1984432 | 3.5965472  | -0.1627619 |

|              |            |            |            |
|--------------|------------|------------|------------|
| H            | -2.9556372 | 2.5697352  | 0.6351151  |
| C            | -5.7359452 | 1.1695642  | 0.8748211  |
| H            | -6.2388392 | 2.1394822  | 0.9707551  |
| H            | -6.4823832 | 0.3926652  | 0.6817901  |
| H            | -5.2007802 | 0.9221362  | 1.7982721  |
| C            | -5.5806872 | 1.5943172  | -1.9818339 |
| H            | -6.1514122 | 2.5182672  | -1.8299409 |
| H            | -4.9303782 | 1.7052862  | -2.8549979 |
| H            | -6.2727422 | 0.7676742  | -2.1690699 |
| B            | -2.9317282 | -0.3175548 | 2.7188891  |
| F            | -1.8883792 | -0.3608988 | 3.6365751  |
| F            | -4.1620552 | -0.1980938 | 3.3226691  |
| F            | -2.8972252 | -1.4971368 | 1.9224301  |
| F            | -2.7164912 | 0.7806882  | 1.8554891  |
| <b>D-ts1</b> |            |            |            |
| C            | 0.1034781  | -2.9170838 | -1.6278015 |
| C            | 1.2961301  | -2.7598938 | -2.3488625 |
| C            | 1.7611731  | -1.5043808 | -2.7158705 |
| C            | 0.9819811  | -0.4186428 | -2.3344005 |
| C            | -0.1975849 | -0.5500088 | -1.5892575 |
| C            | -0.6493529 | -1.8200178 | -1.2309735 |
| N            | 1.1850881  | 0.9383542  | -2.5757935 |
| C            | 0.1971801  | 1.6537472  | -2.0262745 |
| C            | -0.6351479 | 0.8077102  | -1.2672535 |
| N            | -2.1778279 | 3.2430012  | 0.5448295  |
| C            | -2.2223109 | 2.6257812  | -0.6569305 |
| C            | -1.9641359 | 1.1112932  | -0.6338685 |

|    |            |            |            |
|----|------------|------------|------------|
| O  | -2.4003559 | 3.1801412  | -1.7323725 |
| N  | -1.9312789 | 0.5172852  | 0.6989245  |
| C  | -0.7104919 | 0.2792802  | 1.2751925  |
| C  | 0.3755791  | 0.9148512  | 0.5002845  |
| O  | -0.5507829 | -0.3017778 | 2.3373385  |
| C  | 1.4954011  | 1.5132862  | 0.7287005  |
| C  | 2.3234111  | 2.5599472  | 0.0927475  |
| Au | 2.6279401  | -0.1185768 | 1.5644745  |
| C  | -4.7307559 | -2.8119798 | -0.6154905 |
| C  | -4.0878079 | -3.9188118 | -0.0529615 |
| C  | -3.1836699 | -3.7363608 | 0.9964605  |
| C  | -2.9231499 | -2.4507708 | 1.4616935  |
| C  | -3.5458989 | -1.3381068 | 0.8976445  |
| C  | -4.4604379 | -1.5395028 | -0.1406975 |
| C  | -3.1584779 | 0.0443122  | 1.3404745  |
| O  | -4.4106259 | -5.1199448 | -0.5869125 |
| C  | -3.7660719 | -6.2614918 | -0.0776495 |
| C  | -2.1251049 | 4.7066312  | 0.7337685  |
| C  | -1.9993329 | 4.9392892  | 2.2331825  |
| C  | -3.4052769 | 5.3476802  | 0.2103835  |
| C  | -0.8989419 | 5.2652662  | 0.0160045  |
| H  | -0.2435079 | -3.9162578 | -1.3704615 |
| H  | 1.8709131  | -3.6396788 | -2.6303025 |
| H  | 2.7058681  | -1.3695988 | -3.2375175 |
| H  | -1.5675559 | -1.9548018 | -0.6648305 |
| H  | 2.0824151  | 1.2941702  | -2.9316775 |
| H  | 0.1358221  | 2.7306172  | -2.1316505 |

|   |            |            |            |
|---|------------|------------|------------|
| H | -1.9388639 | 2.6645792  | 1.3403525  |
| H | -2.7737069 | 0.6340842  | -1.2089075 |
| H | 2.7028151  | 3.2606442  | 0.8445005  |
| H | 1.7486801  | 3.1300982  | -0.6519655 |
| H | 3.1904201  | 2.1070442  | -0.4044905 |
| H | -5.4368899 | -2.9825198 | -1.4238425 |
| H | -2.6800409 | -4.5818498 | 1.4557485  |
| H | -2.1975279 | -2.2986698 | 2.2596845  |
| H | -4.9698859 | -0.6833758 | -0.5840395 |
| H | -3.9498159 | 0.7712052  | 1.1098055  |
| H | -2.9769189 | 0.0698772  | 2.4209155  |
| H | -4.1467749 | -7.1126958 | -0.6454485 |
| H | -3.9888309 | -6.4142328 | 0.9880655  |
| H | -2.6755199 | -6.2032098 | -0.2078515 |
| H | -1.0814509 | 4.4844112  | 2.6295105  |
| H | -2.8591869 | 4.5199312  | 2.7706465  |
| H | -1.9590709 | 6.0133872  | 2.4444705  |
| H | -3.5243349 | 5.1584982  | -0.8597125 |
| H | -4.2782669 | 4.9456272  | 0.7382735  |
| H | -3.3721479 | 6.4312912  | 0.3769605  |
| H | -0.9744639 | 5.1011002  | -1.0638015 |
| H | 0.0129591  | 4.7790002  | 0.3891705  |
| H | -0.8107699 | 6.3433842  | 0.1964615  |
| P | 4.4023891  | -1.6427098 | 1.4612425  |
| C | 4.7393441  | -2.7456048 | 2.8790865  |
| H | 5.6105201  | -3.3784688 | 2.6709475  |
| H | 4.9326861  | -2.1469978 | 3.7743195  |

|               |           |            |            |
|---------------|-----------|------------|------------|
| H             | 3.8677651 | -3.3795178 | 3.0677615  |
| C             | 4.2362031 | -2.7560698 | 0.0294005  |
| H             | 4.2125801 | -2.1380558 | -0.8754795 |
| H             | 5.0854401 | -3.4489308 | -0.0104245 |
| H             | 3.2988311 | -3.3166748 | 0.0996875  |
| C             | 5.9721021 | -0.7676618 | 1.1648435  |
| H             | 6.2051681 | -0.1238668 | 2.0186095  |
| H             | 6.7837991 | -1.4909788 | 1.0198725  |
| H             | 5.8691771 | -0.1470598 | 0.2655215  |
| B             | 4.5372721 | 0.4224272  | -2.1991715 |
| F             | 3.6548471 | 0.0709332  | -1.1423175 |
| F             | 4.8300301 | -0.7254558 | -2.9155545 |
| F             | 3.8440971 | 1.3458522  | -3.0205955 |
| F             | 5.6608511 | 1.0062762  | -1.6545475 |
| <b>D-int4</b> |           |            |            |
| C             | 2.5593247 | 2.1858650  | -2.4545820 |
| C             | 3.5919877 | 1.4652120  | -3.0563240 |
| C             | 3.7754797 | 0.1060710  | -2.8061290 |
| C             | 2.8702247 | -0.4686790 | -1.9307980 |
| C             | 1.8216517 | 0.2237840  | -1.3279270 |
| C             | 1.6551207 | 1.5736680  | -1.5847560 |
| N             | 2.8047407 | -1.8201050 | -1.5021300 |
| C             | 1.8192177 | -2.0025450 | -0.6896750 |
| C             | 1.0675077 | -0.7322150 | -0.4293650 |
| N             | 0.3460537 | -1.7231400 | 2.8670910  |
| C             | 1.3498277 | -1.4894200 | 1.9999450  |
| C             | 1.1709107 | -0.2826590 | 1.0688090  |

|    |            |            |            |
|----|------------|------------|------------|
| O  | 2.3668537  | -2.1646590 | 1.8903630  |
| N  | -0.0430413 | 0.4605680  | 1.2845150  |
| C  | -1.0314093 | 0.1772380  | 0.3642940  |
| C  | -0.4557873 | -0.7487930 | -0.6457440 |
| O  | -2.1558643 | 0.6587340  | 0.4220830  |
| C  | -1.1842193 | -1.3344000 | -1.6160690 |
| C  | -0.5810283 | -2.1701640 | -2.6949220 |
| Au | -3.2425203 | -1.0315590 | -1.6500140 |
| C  | 2.3163387  | 4.2987880  | 1.1257970  |
| C  | 1.5344067  | 5.0319530  | 0.2282760  |
| C  | 0.1975277  | 4.6804380  | 0.0249470  |
| C  | -0.3350843 | 3.5899160  | 0.7072510  |
| C  | 0.4398707  | 2.8405920  | 1.5906870  |
| C  | 1.7702287  | 3.2177370  | 1.7967870  |
| C  | -0.1253203 | 1.5909520  | 2.2044590  |
| O  | 2.1590637  | 6.0601850  | -0.3916780 |
| C  | 1.4232607  | 6.8126140  | -1.3247880 |
| C  | 0.2726807  | -2.8837610 | 3.7796720  |
| C  | -1.0438583 | -2.7517730 | 4.5329080  |
| C  | 1.4415057  | -2.8458160 | 4.7581990  |
| C  | 0.2838197  | -4.1771700 | 2.9692870  |
| H  | 2.4531477  | 3.2484480  | -2.6650580 |
| H  | 4.2739297  | 1.9729710  | -3.7334890 |
| H  | 4.5695547  | -0.4821700 | -3.2623740 |
| H  | 0.8521827  | 2.1464360  | -1.1228370 |
| H  | 3.4574917  | -2.5812780 | -1.8494150 |
| H  | 1.5897467  | -2.9821280 | -0.2848500 |



|   |            |            |            |
|---|------------|------------|------------|
| H | -0.4668273 | -1.1239710 | 2.7884420  |
| H | 2.0620947  | 0.3482840  | 1.1986920  |
| H | -1.0049413 | -3.1823680 | -2.6778550 |
| H | 0.5129427  | -2.2570550 | -2.6669710 |
| H | -0.8518493 | -1.7568810 | -3.6748050 |
| H | 3.3510997  | 4.5974510  | 1.2707290  |
| H | -0.4324003 | 5.2438910  | -0.6570750 |
| H | -1.3700363 | 3.2960840  | 0.5338760  |
| H | 2.3894637  | 2.6520480  | 2.4934700  |
| H | 0.4058717  | 1.3235000  | 3.1287430  |
| H | -1.1882263 | 1.7147450  | 2.4430300  |
| H | 2.1033847  | 7.5702110  | -1.7186580 |
| H | 0.5628787  | 7.3127550  | -0.8574620 |
| H | 1.0624077  | 6.1885270  | -2.1557090 |
| H | -1.8993033 | -2.7754310 | 3.8448280  |
| H | -1.0789853 | -1.8165950 | 5.1063160  |
| H | -1.1567033 | -3.5831240 | 5.2370610  |
| H | 2.3955817  | -2.9034590 | 4.2270540  |
| H | 1.4206077  | -1.9210150 | 5.3471630  |
| H | 1.3735247  | -3.6944660 | 5.4493980  |
| H | 1.2261767  | -4.2861120 | 2.4243850  |
| H | -0.5464863 | -4.1884580 | 2.2516830  |
| H | 0.1704977  | -5.0386640 | 3.6382470  |
| P | -5.5682033 | -0.5712050 | -1.5975150 |
| C | -5.9300733 | 0.6661710  | -0.3017770 |
| H | -6.9996133 | 0.9043630  | -0.2590630 |
| H | -5.5963103 | 0.2777240  | 0.6656110  |

|   |            |            |            |
|---|------------|------------|------------|
| H | -5.3541273 | 1.5740800  | -0.5072230 |
| C | -6.3034133 | 0.1575860  | -3.1052190 |
| H | -6.2203343 | -0.5515430 | -3.9343870 |
| H | -7.3590403 | 0.4071560  | -2.9440960 |
| H | -5.7526933 | 1.0640960  | -3.3744030 |
| C | -6.7000803 | -1.9528460 | -1.2035780 |
| H | -6.4070113 | -2.4016920 | -0.2496050 |
| H | -7.7367173 | -1.6013710 | -1.1368810 |
| H | -6.6263763 | -2.7206440 | -1.9796810 |
| B | 5.5510647  | -2.9292390 | -2.7392930 |
| F | 5.4620137  | -2.2557650 | -3.9526400 |
| F | 5.5800087  | -1.9981970 | -1.6974410 |
| F | 4.2957457  | -3.6515170 | -2.5579180 |
| F | 6.5888647  | -3.8067890 | -2.6919200 |

**D-int1**

|   |            |            |            |
|---|------------|------------|------------|
| C | -1.5182711 | -3.4303494 | 0.8096837  |
| C | -0.5591561 | -3.7423434 | 1.7736347  |
| C | 0.4805809  | -2.8585863 | 2.0631697  |
| C | 0.4964569  | -1.6771204 | 1.3464907  |
| C | -0.4432501 | -1.3462014 | 0.3736747  |
| C | -1.4706781 | -2.2298104 | 0.0958137  |
| N | 1.4317759  | -0.6214274 | 1.4339467  |
| C | 1.1511979  | 0.3276546  | 0.5998197  |
| C | -0.1131091 | 0.0358376  | -0.1556083 |
| C | -1.2684431 | 1.0389306  | 0.1888737  |
| N | -2.0297801 | 1.1108946  | -1.0297193 |
| C | -1.3588671 | 0.6082356  | -2.1398653 |

|    |            |            |            |
|----|------------|------------|------------|
| C  | -0.0238731 | 0.1518496  | -1.6743813 |
| O  | -1.8610541 | 0.5689786  | -3.2506363 |
| C  | -0.6948581 | 2.3701246  | 0.6825087  |
| O  | -0.0652161 | 2.3691596  | 1.7356237  |
| N  | -0.9104781 | 3.4369266  | -0.1061463 |
| C  | 1.0516969  | -0.1692564 | -2.4265773 |
| Au | 2.8278479  | -0.8893214 | -1.6184353 |
| C  | 1.0256869  | -0.0425284 | -3.9188803 |
| C  | -0.3325001 | 4.7800537  | 0.1168497  |
| C  | -0.8058941 | 5.6467146  | -1.0416353 |
| C  | -0.8425781 | 5.3452037  | 1.4379667  |
| C  | 1.1912489  | 4.6890737  | 0.1165127  |
| C  | -4.9242271 | -2.1985374 | -1.2225113 |
| C  | -5.2547981 | -2.4484004 | 0.1154957  |
| C  | -5.0787191 | -1.4484334 | 1.0710977  |
| C  | -4.5499351 | -0.2183494 | 0.6821297  |
| C  | -4.1902701 | 0.0334256  | -0.6377493 |
| C  | -4.3974101 | -0.9734774 | -1.5908583 |
| C  | -3.4778751 | 1.2973487  | -1.0288703 |
| O  | -5.7330231 | -3.6878824 | 0.3800647  |
| C  | -6.0673421 | -3.9913494 | 1.7126037  |
| H  | -2.3229931 | -4.1329854 | 0.6021587  |
| H  | -0.6217041 | -4.6864644 | 2.3085717  |
| H  | 1.2382289  | -3.0720824 | 2.8132907  |
| H  | -2.2298381 | -2.0023954 | -0.6511303 |
| H  | 2.2711999  | -0.6263404 | 2.0581287  |
| H  | 1.8066699  | 1.1879957  | 0.5074807  |

|   |            |            |            |
|---|------------|------------|------------|
| H | -1.8703261 | 0.6368396  | 1.0175087  |
| H | -1.3780231 | 3.2521876  | -0.9864503 |
| H | 0.0974219  | 0.3776486  | -4.3158073 |
| H | 1.8793199  | 0.5601986  | -4.2551063 |
| H | 1.1750989  | -1.0354184 | -4.3648933 |
| H | -0.4493271 | 5.2546416  | -2.0031303 |
| H | -0.4162441 | 6.6642687  | -0.9301023 |
| H | -1.9014801 | 5.7053207  | -1.0701043 |
| H | -0.5380011 | 4.7104747  | 2.2749147  |
| H | -0.4321921 | 6.3502056  | 1.5932317  |
| H | -1.9368271 | 5.4186277  | 1.4286597  |
| H | 1.5476949  | 4.0731427  | 0.9476987  |
| H | 1.6252019  | 5.6907757  | 0.2201977  |
| H | 1.5510089  | 4.2564436  | -0.8257803 |
| H | -5.0885601 | -2.9904444 | -1.9489973 |
| H | -5.3410371 | -1.6129994 | 2.1117957  |
| H | -4.4142121 | 0.5601556  | 1.4337557  |
| H | -4.1120611 | -0.7879314 | -2.6257613 |
| H | -3.7462011 | 1.6035306  | -2.0464963 |
| H | -3.7200491 | 2.1225127  | -0.3443603 |
| H | -6.4202671 | -5.0244333 | 1.7172627  |
| H | -6.8674041 | -3.3387404 | 2.0900657  |
| H | -5.1961191 | -3.9062694 | 2.3786727  |
| P | 4.8769909  | -1.7975904 | -0.7726003 |
| C | 6.2253579  | -0.6084354 | -0.4846153 |
| H | 5.8847729  | 0.1395526  | 0.2330037  |
| H | 7.1023219  | -1.1226204 | -0.0745173 |

|              |            |            |            |
|--------------|------------|------------|------------|
| H            | 6.4829979  | -0.1320424 | -1.4360513 |
| C            | 5.6213339  | -3.0053173 | -1.9328863 |
| H            | 6.5450099  | -3.4234284 | -1.5145823 |
| H            | 4.9121539  | -3.8164964 | -2.1262583 |
| H            | 5.8480209  | -2.5113413 | -2.8830673 |
| C            | 4.6976409  | -2.7718394 | 0.7590017  |
| H            | 5.6786899  | -3.1180694 | 1.1049227  |
| H            | 4.2488169  | -2.1667144 | 1.5512837  |
| H            | 4.0558589  | -3.6334883 | 0.5433727  |
| B            | 4.4291209  | 0.2207966  | 2.6220307  |
| F            | 3.9247679  | 0.6235546  | 1.3547937  |
| F            | 5.6663909  | -0.3617744 | 2.4563637  |
| F            | 4.4212779  | 1.2521426  | 3.5052077  |
| F            | 3.5046099  | -0.8123934 | 3.0652357  |
| <b>D-ts2</b> |            |            |            |
| C            | 0.6908555  | -2.7336225 | 2.6229634  |
| C            | -0.3869035 | -2.3669925 | 3.4274114  |
| C            | -1.2161085 | -1.2967805 | 3.0851024  |
| C            | -0.9183025 | -0.6288985 | 1.9108814  |
| C            | 0.1480565  | -0.9869615 | 1.0916484  |
| C            | 0.9732215  | -2.0376565 | 1.4446804  |
| N            | -1.6179525 | 0.4325185  | 1.3001024  |
| C            | -1.0290855 | 0.8143685  | 0.1779094  |
| C            | 0.2132655  | -0.0346395 | -0.0821186 |
| N            | -0.0462415 | 2.6496125  | 0.4500554  |
| C            | 1.3120335  | 2.1815185  | 0.5538794  |
| C            | 1.5276705  | 0.7830065  | 0.0002134  |

|    |            |            |            |
|----|------------|------------|------------|
| O  | 2.1791735  | 2.8061455  | 1.1122794  |
| N  | 2.0605785  | 0.7944495  | -1.3385226 |
| C  | 1.4641905  | -0.1601775 | -2.1626146 |
| C  | 0.2368915  | -0.6380355 | -1.4838946 |
| O  | 1.9360685  | -0.4698885 | -3.2439636 |
| C  | -0.7492195 | -1.4019965 | -2.0086846 |
| C  | -0.6590165 | -1.9649815 | -3.3938676 |
| Au | -2.5520135 | -1.7571125 | -1.0277256 |
| C  | 5.8880305  | -0.0353365 | 1.0721344  |
| C  | 6.1692065  | -1.3209675 | 0.6022374  |
| C  | 5.5682505  | -1.7772015 | -0.5731506 |
| C  | 4.7008995  | -0.9400365 | -1.2689626 |
| C  | 4.4219405  | 0.3488885  | -0.8158566 |
| C  | 5.0213465  | 0.7858355  | 0.3693054  |
| C  | 3.4404835  | 1.2106665  | -1.5626906 |
| O  | 7.0313725  | -2.0477975 | 1.3545984  |
| C  | 7.3604925  | -3.3408725 | 0.9121004  |
| C  | -0.3721335 | 3.7036825  | -0.5981896 |
| C  | -1.8467245 | 4.0310225  | -0.4168636 |
| C  | -0.0902865 | 3.1611375  | -1.9901296 |
| C  | 0.4770595  | 4.9446075  | -0.3434446 |
| H  | 1.3174185  | -3.5720725 | 2.9156164  |
| H  | -0.5854275 | -2.9209995 | 4.3415324  |
| H  | -2.0562755 | -0.9973895 | 3.7076864  |
| H  | 1.8151715  | -2.3151365 | 0.8099064  |
| H  | -2.5538105 | 0.7700845  | 1.5843604  |
| H  | -1.6392845 | 1.2659505  | -0.5957646 |

|   |            |            |            |
|---|------------|------------|------------|
| H | 2.2466535  | 0.3043515  | 0.6884874  |
| H | -0.7359195 | -3.0594105 | -3.3398056 |
| H | 0.2566585  | -1.6963735 | -3.9265186 |
| H | -1.5310785 | -1.6434045 | -3.9789356 |
| H | 6.3636125  | 0.2918655  | 1.9931694  |
| H | 5.7738265  | -2.7718975 | -0.9578816 |
| H | 4.2304895  | -1.2898355 | -2.1876706 |
| H | 4.7915545  | 1.7817345  | 0.7478654  |
| H | 3.5456175  | 2.2653495  | -1.2709436 |
| H | 3.5911145  | 1.1382815  | -2.6456126 |
| H | 8.0659495  | -3.7485105 | 1.6390454  |
| H | 7.8378185  | -3.3231525 | -0.0782556 |
| H | 6.4769485  | -3.9941655 | 0.8670904  |
| H | -2.0563885 | 4.4019005  | 0.5941344  |
| H | -2.5129225 | 3.1799445  | -0.5895666 |
| H | -2.1296125 | 4.8224885  | -1.1201426 |
| H | 0.9731425  | 2.9356315  | -2.1361906 |
| H | -0.6645335 | 2.2556065  | -2.2188476 |
| H | -0.3758625 | 3.9230435  | -2.7237496 |
| H | 1.5466975  | 4.7454255  | -0.4692406 |
| H | 0.3200335  | 5.3336645  | 0.6700974  |
| H | 0.1886195  | 5.7283975  | -1.0537286 |
| P | -4.7034545 | -2.0808205 | -0.0356386 |
| C | -4.8506525 | -1.6710765 | 1.7362074  |
| H | -5.8731785 | -1.8626185 | 2.0832924  |
| H | -4.1489455 | -2.2924595 | 2.3039544  |
| H | -4.6174795 | -0.6134325 | 1.8994304  |

|   |            |            |            |
|---|------------|------------|------------|
| C | -6.0485705 | -1.1541285 | -0.8421876 |
| H | -6.0657665 | -1.3951475 | -1.9096106 |
| H | -7.0121655 | -1.4153065 | -0.3883356 |
| H | -5.8682215 | -0.0844385 | -0.7041806 |
| C | -5.2721565 | -3.8210855 | -0.1059326 |
| H | -4.5652285 | -4.4613395 | 0.4312244  |
| H | -6.2676535 | -3.9223755 | 0.3431154  |
| H | -5.3116535 | -4.1514205 | -1.1487886 |
| H | -0.2861475 | 3.0656075  | 1.3541094  |
| B | -4.6227465 | 1.9002715  | 0.8959884  |
| F | -4.5401065 | 3.2650785  | 0.8306434  |
| F | -5.9135295 | 1.4252365  | 0.8743084  |
| F | -3.9858865 | 1.4390845  | 2.1055814  |
| F | -3.8837675 | 1.3114935  | -0.1661436 |

**D-int2**

|   |            |            |            |
|---|------------|------------|------------|
| C | 0.0061744  | -3.2037404 | 2.0426898  |
| C | -0.9056176 | -2.7288274 | 2.9848668  |
| C | -1.3973286 | -1.4245554 | 2.9282747  |
| C | -0.9587576 | -0.6135684 | 1.8897558  |
| C | -0.0559806 | -1.0844774 | 0.9375177  |
| C | 0.4422294  | -2.3731304 | 1.0093918  |
| N | -1.3197106 | 0.7172346  | 1.6366678  |
| C | -0.8291166 | 1.0777856  | 0.3411948  |
| C | 0.2279114  | 0.0013786  | -0.0676662 |
| N | -0.0836906 | 2.4128546  | 0.4914338  |
| C | 1.3767044  | 2.0352026  | 0.7019318  |
| C | 1.6086344  | 0.6580926  | 0.1440338  |



|    |            |            |            |
|----|------------|------------|------------|
| O  | 2.1288194  | 2.7872436  | 1.2382928  |
| N  | 2.1664444  | 0.8071536  | -1.1755022 |
| C  | 1.4721014  | 0.0800936  | -2.1518082 |
| C  | 0.2186194  | -0.3975974 | -1.5354612 |
| O  | 1.9103134  | -0.0470414 | -3.2821932 |
| C  | -0.8096946 | -1.0341204 | -2.1430852 |
| C  | -0.7738836 | -1.3895254 | -3.5968222 |
| Au | -2.5627766 | -1.5067374 | -1.1150082 |
| C  | 6.0404904  | -0.0122794 | 1.1714048  |
| C  | 6.3607784  | -1.2628054 | 0.6357978  |
| C  | 5.7637134  | -1.6819084 | -0.5558552 |
| C  | 4.8592774  | -0.8434864 | -1.1996722 |
| C  | 4.5412484  | 0.4100166  | -0.6810032 |
| C  | 5.1381894  | 0.8105396  | 0.5174587  |
| C  | 3.5288504  | 1.2746236  | -1.3772202 |
| O  | 7.2556724  | -1.9936704 | 1.3427488  |
| C  | 7.6154394  | -3.2577784 | 0.8423398  |
| C  | -0.4121696 | 3.5494626  | -0.5341012 |
| C  | -1.8842096 | 3.8640326  | -0.3285062 |
| C  | -0.1194196 | 3.0681686  | -1.9406282 |
| C  | 0.4442054  | 4.7544966  | -0.1798982 |
| H  | 0.3745144  | -4.2239634 | 2.1112098  |
| H  | -1.2388826 | -3.3855814 | 3.7857528  |
| H  | -2.1075576 | -1.0496714 | 3.6624658  |
| H  | 1.1362124  | -2.7341624 | 0.2510808  |
| H  | -2.2982046 | 0.9755606  | 1.8187358  |
| H  | -1.6274696 | 1.2117766  | -0.3953222 |

|   |            |            |            |
|---|------------|------------|------------|
| H | 2.2771354  | 0.1027116  | 0.8222008  |
| H | -0.9073166 | -2.4743624 | -3.7053893 |
| H | 0.1425954  | -1.0873944 | -4.1110843 |
| H | -1.6413566 | -0.9435904 | -4.1019803 |
| H | 6.5154964  | 0.2858066  | 2.1025068  |
| H | 5.9985844  | -2.6492104 | -0.9901072 |
| H | 4.3903074  | -1.1638394 | -2.1303032 |
| H | 4.8835824  | 1.7818826  | 0.9423588  |
| H | 3.6111254  | 2.3178296  | -1.0346202 |
| H | 3.6712974  | 1.2638176  | -2.4645332 |
| H | 8.3390284  | -3.6757484 | 1.5450298  |
| H | 8.0823704  | -3.1845554 | -0.1503452 |
| H | 6.7492924  | -3.9320654 | 0.7781718  |
| H | -2.1053586 | 4.1462696  | 0.7086157  |
| H | -2.5569706 | 3.0431966  | -0.5900432 |
| H | -2.1458226 | 4.7195416  | -0.9607822 |
| H | 0.9479574  | 2.8688236  | -2.0948523 |
| H | -0.6860186 | 2.1679146  | -2.2052532 |
| H | -0.4175746 | 3.8619186  | -2.6340983 |
| H | 1.5108434  | 4.5836406  | -0.3535202 |
| H | 0.3069154  | 5.0639926  | 0.8629967  |
| H | 0.1269444  | 5.5861406  | -0.8181232 |
| P | -4.6267766 | -2.0177074 | -0.0302302 |
| C | -4.7357716 | -1.6338244 | 1.7492768  |
| H | -5.7450466 | -1.8512494 | 2.1193588  |
| H | -4.0038256 | -2.2496584 | 2.2837078  |
| H | -4.5118666 | -0.5761124 | 1.9232478  |

|              |            |            |            |
|--------------|------------|------------|------------|
| C            | -6.0832386 | -1.2087434 | -0.7701343 |
| H            | -6.1118866 | -1.4160744 | -1.8442672 |
| H            | -7.0011966 | -1.5793054 | -0.2977852 |
| H            | -6.0028436 | -0.1316224 | -0.5978812 |
| C            | -5.0465546 | -3.8006834 | -0.0887642 |
| H            | -4.2564056 | -4.3766514 | 0.4039078  |
| H            | -6.0031566 | -3.9927914 | 0.4124127  |
| H            | -5.1126286 | -4.1286524 | -1.1310942 |
| H            | -0.3830676 | 2.7810776  | 1.4037408  |
| B            | -4.5695466 | 1.8750996  | 0.9594207  |
| F            | -4.5542956 | 3.2401496  | 0.7966937  |
| F            | -5.8441626 | 1.3492196  | 0.9520087  |
| F            | -3.9293916 | 1.5283346  | 2.1868728  |
| F            | -3.8034686 | 1.2593836  | -0.0726272 |
| <b>D-ts3</b> |            |            |            |
| C            | -0.2009501 | -2.7272006 | 2.4331542  |
| C            | -1.1940131 | -2.1207076 | 3.2042203  |
| C            | -1.6579071 | -0.8422976 | 2.8996452  |
| C            | -1.1106431 | -0.2103946 | 1.7938503  |
| C            | -0.1259151 | -0.8037496 | 1.0125943  |
| C            | 0.3442489  | -2.0683356 | 1.3333012  |
| N            | -1.4486931 | 1.0868864  | 1.3065772  |
| C            | -0.7072611 | 1.2836914  | 0.0359402  |
| C            | 0.2653949  | 0.0906244  | -0.1328248 |
| N            | 0.0821949  | 2.4842814  | 0.4809622  |
| C            | 1.4956759  | 2.1097364  | 0.5489832  |
| C            | 1.6663849  | 0.7015414  | 0.0229142  |

|    |            |            |            |
|----|------------|------------|------------|
| O  | 2.3629039  | 2.8446184  | 0.9322002  |
| N  | 2.1700489  | 0.7997154  | -1.3279258 |
| C  | 1.4894269  | -0.0531386 | -2.2102018 |
| C  | 0.2566969  | -0.5050146 | -1.5302048 |
| O  | 1.9215109  | -0.3049036 | -3.3218628 |
| C  | -0.7625991 | -1.2294636 | -2.0469197 |
| C  | -0.7278481 | -1.7446756 | -3.4524528 |
| Au | -2.5139121 | -1.6370746 | -0.9840118 |
| C  | 6.0258319  | -0.2939096 | 0.9255902  |
| C  | 6.2554869  | -1.5599226 | 0.3803062  |
| C  | 5.6147929  | -1.9323546 | -0.8036538 |
| C  | 4.7568909  | -1.0338016 | -1.4307577 |
| C  | 4.5275289  | 0.2352454  | -0.9018428 |
| C  | 5.1690499  | 0.5893864  | 0.2889112  |
| C  | 3.5594929  | 1.1693384  | -1.5736168 |
| O  | 7.1107389  | -2.3530886 | 1.0715222  |
| C  | 7.3824219  | -3.6321596 | 0.5553643  |
| C  | -0.2963371 | 3.8653354  | -0.0750988 |
| C  | -1.8152131 | 3.9789724  | -0.0792208 |
| C  | 0.2653839  | 3.9610594  | -1.4842508 |
| C  | 0.2843769  | 4.9306114  | 0.8447362  |
| H  | 0.1469029  | -3.7239816 | 2.6919063  |
| H  | -1.6076661 | -2.6483606 | 4.0606213  |
| H  | -2.4274801 | -0.3552976 | 3.4948912  |
| H  | 1.1030089  | -2.5407366 | 0.7111973  |
| H  | -2.4674581 | 1.2844474  | 1.2474482  |
| H  | -1.3654361 | 1.4646584  | -0.8147968 |

|   |            |            |            |
|---|------------|------------|------------|
| H | 2.3439059  | 0.1302564  | 0.6792302  |
| H | -0.8380141 | -2.8374736 | -3.4406438 |
| H | 0.1783149  | -1.4799716 | -4.0038098 |
| H | -1.6069381 | -1.3726076 | -3.9957298 |
| H | 6.5342759  | -0.0314566 | 1.8499042  |
| H | 5.7797769  | -2.9102626 | -1.2464118 |
| H | 4.2530819  | -1.3185826 | -2.3543288 |
| H | 4.9833979  | 1.5729734  | 0.7211462  |
| H | 3.7195969  | 2.2015054  | -1.2346508 |
| H | 3.6735879  | 1.1438354  | -2.6629618 |
| H | 8.0862829  | -4.1031106 | 1.2446773  |
| H | 7.8404849  | -3.5797616 | -0.4428488 |
| H | 6.4740949  | -4.2492346 | 0.4953872  |
| H | -2.2499731 | 3.8172344  | 0.9153252  |
| H | -2.3162611 | 3.3011474  | -0.7753458 |
| H | -2.0784981 | 4.9977914  | -0.3826998 |
| H | 1.3609219  | 3.9125844  | -1.4899108 |
| H | -0.1238651 | 3.1617004  | -2.1271048 |
| H | -0.0326461 | 4.9181054  | -1.9266188 |
| H | 1.3751219  | 4.9233844  | 0.8644532  |
| H | -0.0862111 | 4.8030114  | 1.8692713  |
| H | -0.0541391 | 5.9099194  | 0.4884182  |
| P | -4.5556571 | -2.2274636 | 0.1103492  |
| C | -4.9923721 | -1.4128836 | 1.6844393  |
| H | -5.9789921 | -1.7560466 | 2.0193883  |
| H | -4.2418561 | -1.6805206 | 2.4362642  |
| H | -5.0053471 | -0.3276036 | 1.5471513  |

|   |            |            |            |
|---|------------|------------|------------|
| C | -6.0481861 | -2.0492926 | -0.9232478 |
| H | -5.9063161 | -2.5860586 | -1.8663778 |
| H | -6.9268121 | -2.4477696 | -0.4015078 |
| H | -6.1890301 | -0.9842076 | -1.1263108 |
| C | -4.5544641 | -4.0014176 | 0.5727272  |
| H | -3.7239221 | -4.1877956 | 1.2626282  |
| H | -5.4993001 | -4.2846946 | 1.0527502  |
| H | -4.4022011 | -4.6150516 | -0.3209038 |
| H | -0.5655641 | 2.1778354  | 1.5022223  |
| B | -4.5208941 | 1.8000964  | -0.1659928 |
| F | -4.7878551 | 3.1086274  | -0.4610218 |
| F | -5.6129281 | 0.9661534  | -0.3254158 |
| F | -4.0873341 | 1.7066584  | 1.2059293  |
| F | -3.4443301 | 1.3308634  | -0.9550158 |

**D-int3**

|   |            |            |            |
|---|------------|------------|------------|
| C | 0.2751491  | -2.1721917 | 2.7491835  |
| C | -0.7688599 | -1.5139197 | 3.4037555  |
| C | -1.4170610 | -0.4319577 | 2.8132495  |
| C | -0.9679079 | -0.0564777 | 1.5582355  |
| C | 0.0577161  | -0.6909797 | 0.8864625  |
| C | 0.6990540  | -1.7667017 | 1.4879665  |
| N | -1.5376649 | 1.0090133  | 0.7364295  |
| C | -0.7367229 | 1.0394473  | -0.5905335 |
| C | 0.3412441  | -0.0651177 | -0.4439185 |
| N | -0.0625179 | 2.2726813  | -0.7945235 |
| C | 1.3059471  | 2.1699303  | -0.6108975 |
| C | 1.6716700  | 0.7013313  | -0.4592835 |

|    |            |            |            |
|----|------------|------------|------------|
| O  | 2.1041250  | 3.0844673  | -0.6254635 |
| N  | 2.3608071  | 0.2295213  | -1.6343675 |
| C  | 1.7405851  | -0.8347237 | -2.2667715 |
| C  | 0.4131991  | -1.0222407 | -1.6212665 |
| O  | 2.2550161  | -1.4557477 | -3.1833965 |
| C  | -0.5808710 | -1.8576977 | -1.9865005 |
| C  | -0.4550629 | -2.7768867 | -3.1633375 |
| Au | -2.4049939 | -1.9439017 | -0.9729525 |
| C  | 5.9519130  | 0.4130413  | 1.2083025  |
| C  | 6.2814811  | -0.9443827 | 1.2412465  |
| C  | 5.7926081  | -1.8023267 | 0.2534615  |
| C  | 4.9858081  | -1.2906567 | -0.7588915 |
| C  | 4.6606451  | 0.0631943  | -0.8094705 |
| C  | 5.1485300  | 0.9064533  | 0.1927105  |
| C  | 3.7492841  | 0.5824983  | -1.8867575 |
| O  | 7.0770661  | -1.3332077 | 2.2693495  |
| C  | 7.4536691  | -2.6853097 | 2.3322755  |
| C  | -0.7245659 | 3.5413133  | -1.2586755 |
| C  | -2.1720989 | 3.2548213  | -1.6407955 |
| C  | 0.0099521  | 4.0560773  | -2.4945275 |
| C  | -0.6739229 | 4.5651373  | -0.1282725 |
| H  | 0.7641210  | -3.0131467 | 3.2346695  |
| H  | -1.0809369 | -1.8473537 | 4.3902085  |
| H  | -2.2413899 | 0.0921973  | 3.2908125  |
| H  | 1.5093831  | -2.2767157 | 0.9689405  |
| H  | -2.5480080 | 0.8404063  | 0.5365175  |
| H  | -1.4700339 | 0.8020543  | -1.3675645 |

|   |            |            |            |
|---|------------|------------|------------|
| H | 2.2833051  | 0.5573033  | 0.4464635  |
| H | -0.5953349 | -3.8159097 | -2.8352095 |
| H | 0.5058331  | -2.6921117 | -3.6784385 |
| H | -1.2688650 | -2.5826697 | -3.8749275 |
| H | 6.3423590  | 1.0568833  | 1.9923925  |
| H | 6.0385241  | -2.8603207 | 0.2587755  |
| H | 4.6014780  | -1.9543057 | -1.5338255 |
| H | 4.8839181  | 1.9639553  | 0.1709995  |
| H | 3.8283420  | 1.6736533  | -1.9672725 |
| H | 3.9889661  | 0.1400173  | -2.8602955 |
| H | 8.0936401  | -2.7902007 | 3.2108975  |
| H | 8.0182181  | -2.9935317 | 1.4403025  |
| H | 6.5826170  | -3.3475357 | 2.4446205  |
| H | -2.7751749 | 2.8696443  | -0.8123815 |
| H | -2.2403330 | 2.5724273  | -2.4971405 |
| H | -2.6315400 | 4.2017333  | -1.9443705 |
| H | 1.0382951  | 4.3432263  | -2.2655735 |
| H | 0.0226021  | 3.2910963  | -3.2805505 |
| H | -0.5195649 | 4.9339293  | -2.8822985 |
| H | 0.3554431  | 4.7188583  | 0.2096185  |
| H | -1.3026989 | 4.2575653  | 0.7151065  |
| H | -1.0633400 | 5.5246613  | -0.4891215 |
| P | -4.5467579 | -2.1289857 | 0.1070605  |
| C | -5.9026020 | -1.1442647 | -0.6158185 |
| H | -6.8507760 | -1.3837827 | -0.1196945 |
| H | -5.6752930 | -0.0836367 | -0.4763165 |
| H | -5.9853530 | -1.3609187 | -1.6853055 |



|              |            |            |            |
|--------------|------------|------------|------------|
| C            | -5.1709150 | -3.8487107 | 0.0136755  |
| H            | -4.4660489 | -4.5220007 | 0.5117295  |
| H            | -6.1530840 | -3.9316477 | 0.4945575  |
| H            | -5.2547590 | -4.1528147 | -1.0345445 |
| C            | -4.6185829 | -1.7514087 | 1.8901645  |
| H            | -4.4088769 | -0.6886317 | 2.0570625  |
| H            | -5.6156409 | -1.9847097 | 2.2833025  |
| H            | -3.8692369 | -2.3510527 | 2.4180755  |
| H            | -1.5619340 | 1.9315003  | 1.1989525  |
| B            | -4.2135369 | 2.1321833  | 1.6586055  |
| F            | -3.9246370 | 1.3106113  | 2.7492385  |
| F            | -4.1822500 | 1.2625633  | 0.4889175  |
| F            | -5.4104250 | 2.7495783  | 1.7459575  |
| F            | -3.1423339 | 3.0358203  | 1.4909975  |
| <b>D-ts4</b> |            |            |            |
| C            | -0.8765524 | -0.7836158 | 3.2613733  |
| C            | -2.1018214 | -0.1364648 | 3.1254623  |
| C            | -2.4456424 | 0.5442772  | 1.9526263  |
| C            | -1.4974704 | 0.5469082  | 0.9482693  |
| C            | -0.2613534 | -0.0838738 | 1.0670783  |
| C            | 0.0641406  | -0.7626168 | 2.2266063  |
| N            | -1.5690374 | 1.1117512  | -0.3671127 |
| C            | -0.1964264 | 1.4431402  | -0.7357337 |
| C            | 0.4995726  | 0.1553532  | -0.2055467 |
| N            | 0.5487296  | 2.5169542  | -0.1116347 |
| C            | 1.8549216  | 2.1028322  | 0.1055533  |
| C            | 1.9350746  | 0.5838002  | -0.1246717 |

|    |            |            |            |
|----|------------|------------|------------|
| O  | 2.8149636  | 2.7725312  | 0.4279433  |
| N  | 2.4381136  | 0.2104072  | -1.4338777 |
| C  | 1.6417036  | -0.6996248 | -2.1096017 |
| C  | 0.3472846  | -0.7942698 | -1.3527007 |
| O  | 1.9632036  | -1.2735398 | -3.1349887 |
| C  | -0.8771594 | -1.1999048 | -1.7732727 |
| C  | -1.0828534 | -1.7528258 | -3.1605997 |
| Au | -2.5571364 | -1.9439148 | -0.5647897 |
| C  | 6.2147286  | -0.4939558 | 0.9828303  |
| C  | 6.5105336  | -1.8209188 | 0.6568963  |
| C  | 5.9373786  | -2.4031288 | -0.4753957 |
| C  | 5.0797126  | -1.6492208 | -1.2715797 |
| C  | 4.7874946  | -0.3233308 | -0.9629647 |
| C  | 5.3616356  | 0.2443432  | 0.1794773  |
| C  | 3.8244276  | 0.4580152  | -1.8117297 |
| O  | 7.3600836  | -2.4586118 | 1.4999853  |
| C  | 7.6971826  | -3.7913868 | 1.2079503  |
| C  | 0.0067496  | 3.9115912  | -0.0929987 |
| C  | -0.6653474 | 4.2027902  | -1.4343967 |
| C  | 1.1119936  | 4.9380842  | 0.1301783  |
| C  | -1.0122004 | 4.0179182  | 1.0417773  |
| H  | -0.6422314 | -1.3021598 | 4.1877713  |
| H  | -2.8092714 | -0.1504338 | 3.9521233  |
| H  | -3.4061064 | 1.0437732  | 1.8339863  |
| H  | 1.0258276  | -1.2596708 | 2.3368373  |
| H  | -1.6035384 | -0.0606528 | -1.1611327 |
| H  | -0.1636154 | 1.5332572  | -1.8309407 |

|   |            |            |            |
|---|------------|------------|------------|
| H | 2.5343886  | 0.1333292  | 0.6818703  |
| H | -1.9973304 | -1.3370758 | -3.5994947 |
| H | -1.2248514 | -2.8412428 | -3.1293027 |
| H | -0.2301344 | -1.5537698 | -3.8182577 |
| H | 6.6725946  | -0.0682978 | 1.8721763  |
| H | 6.1527746  | -3.4323828 | -0.7469497 |
| H | 4.6238676  | -2.0994178 | -2.1534397 |
| H | 5.1186216  | 1.2753022  | 0.4393563  |
| H | 4.0158666  | 1.5349432  | -1.7236737 |
| H | 3.9028206  | 0.1735142  | -2.8667637 |
| H | 8.3866536  | -4.1168568 | 1.9896983  |
| H | 8.1956066  | -3.8811968 | 0.2318623  |
| H | 6.8140086  | -4.4467918 | 1.2151813  |
| H | -1.5491704 | 3.5804162  | -1.6167347 |
| H | 0.0400426  | 4.0808242  | -2.2657317 |
| H | -1.0137024 | 5.2414802  | -1.4378847 |
| H | 1.6102786  | 4.8063662  | 1.0930913  |
| H | 1.8762386  | 4.8970682  | -0.6512347 |
| H | 0.6471256  | 5.9309312  | 0.1098143  |
| H | -0.5591564 | 3.7135002  | 1.9924543  |
| H | -1.9084744 | 3.4135872  | 0.8651073  |
| H | -1.3435334 | 5.0590242  | 1.1364283  |
| P | -4.6126924 | -2.6535438 | 0.3256983  |
| C | -5.9348344 | -2.3732298 | -0.8969607 |
| H | -6.9133654 | -2.6214418 | -0.4690787 |
| H | -5.9030694 | -1.3147348 | -1.1756087 |
| H | -5.7572074 | -2.9839648 | -1.7874427 |

|   |            |            |            |
|---|------------|------------|------------|
| C | -4.7826854 | -4.4082238 | 0.8068193  |
| H | -4.0751264 | -4.6411668 | 1.6082723  |
| H | -5.8026884 | -4.6126718 | 1.1533963  |
| H | -4.5571454 | -5.0491148 | -0.0510237 |
| C | -5.1645194 | -1.7171108 | 1.7852373  |
| H | -5.2338704 | -0.6548228 | 1.5179053  |
| H | -6.1485434 | -2.0811268 | 2.1052693  |
| H | -4.4448524 | -1.8380808 | 2.6011073  |
| H | -2.3689374 | 1.7355902  | -0.5656357 |
| B | -4.9035474 | 1.6015782  | -0.3260157 |
| F | -5.2869624 | 1.4510132  | 1.0100593  |
| F | -4.3454634 | 0.3705822  | -0.7626357 |
| F | -5.9395944 | 1.9695252  | -1.1251087 |
| F | -3.8471254 | 2.5640862  | -0.3808817 |

**D-2**

|   |           |            |            |
|---|-----------|------------|------------|
| C | 0.9269434 | -2.6674498 | -2.6432602 |
| C | 2.2783794 | -3.0224408 | -2.6144662 |
| C | 3.1674404 | -2.4820608 | -1.6915102 |
| C | 2.6614704 | -1.5778028 | -0.7549942 |
| C | 1.3002554 | -1.2406478 | -0.7507222 |
| C | 0.4369344 | -1.7560418 | -1.7067252 |
| N | 3.3178504 | -0.9149268 | 0.2497528  |
| C | 2.5142124 | 0.1417202  | 0.7705558  |
| C | 1.0556844 | -0.2958128 | 0.3954228  |
| N | 2.6469364 | 1.4687052  | 0.1311508  |
| C | 1.4669934 | 1.9682392  | -0.3248962 |
| C | 0.3565174 | 1.0012313  | 0.0657008  |

|    |            |            |            |
|----|------------|------------|------------|
| O  | 1.2278864  | 3.0126322  | -0.9125382 |
| N  | -0.2789946 | 1.3860532  | 1.3194048  |
| C  | -0.3963246 | 0.3706582  | 2.2213308  |
| C  | 0.3462554  | -0.8023578 | 1.6226128  |
| O  | -1.0315746 | 0.3977192  | 3.2643148  |
| C  | 0.5015384  | -2.0480748 | 2.1808218  |
| C  | 0.1000504  | -2.4608028 | 3.5582508  |
| Au | -1.5077396 | -1.9933628 | 0.8463958  |
| C  | -3.7259666 | 2.6392782  | -1.3253922 |
| C  | -4.8146576 | 2.0421262  | -0.6814792 |
| C  | -4.6939606 | 1.6267082  | 0.6472608  |
| C  | -3.4832316 | 1.8098872  | 1.3160468  |
| C  | -2.3975236 | 2.4174842  | 0.6876108  |
| C  | -2.5327716 | 2.8253742  | -0.6446022 |
| C  | -1.0916246 | 2.5915922  | 1.4150968  |
| O  | -5.9319276 | 1.8877002  | -1.4351632 |
| C  | -7.0730806 | 1.3486123  | -0.8171362 |
| C  | 3.9875494  | 2.1391782  | 0.0158748  |
| C  | 4.8179674  | 1.7900692  | 1.2481708  |
| C  | 3.8228424  | 3.6579232  | -0.0074852 |
| C  | 4.6545974  | 1.6687652  | -1.2731492 |
| H  | 0.2709694  | -3.0727668 | -3.4102982 |
| H  | 2.6579394  | -3.7213908 | -3.3569982 |
| H  | 4.2301384  | -2.7055538 | -1.6985892 |
| H  | -0.6018746 | -1.4223148 | -1.7544142 |
| H  | 2.6751434  | 0.2494102  | 1.8535638  |
| H  | -0.3883646 | 0.9327492  | -0.7441772 |

|   |            |            |            |
|---|------------|------------|------------|
| H | -0.3508246 | -3.4592978 | 3.5597328  |
| H | -0.5753586 | -1.7374258 | 4.0192978  |
| H | 1.0086184  | -2.5307778 | 4.1713798  |
| H | -3.8481436 | 2.9550072  | -2.3584192 |
| H | -5.5386166 | 1.1934582  | 1.1775588  |
| H | -3.3809746 | 1.4866673  | 2.3519208  |
| H | -1.6819266 | 3.2912502  | -1.1433832 |
| H | -0.5125006 | 3.4199733  | 0.9909948  |
| H | -1.2538956 | 2.7797872  | 2.4814308  |
| H | -7.8629366 | 1.3406543  | -1.5706562 |
| H | -7.4001826 | 1.9555473  | 0.0385978  |
| H | -6.8999766 | 0.3168612  | -0.4708852 |
| H | 5.0460384  | 0.7276912  | 1.3588568  |
| H | 4.3286014  | 2.1654912  | 2.1576028  |
| H | 5.7925694  | 2.2795522  | 1.1555828  |
| H | 3.3181784  | 4.0131593  | -0.9067792 |
| H | 3.2584724  | 4.0104052  | 0.8649018  |
| H | 4.8251224  | 4.0995022  | 0.0368428  |
| H | 4.0160884  | 1.9189672  | -2.1303632 |
| H | 4.8671484  | 0.5952192  | -1.2735242 |
| H | 5.6167774  | 2.1800862  | -1.3931652 |
| P | -3.4650336 | -2.2889288 | -0.4037322 |
| C | -3.5362926 | -3.8838938 | -1.2798792 |
| H | -4.4174896 | -3.9246888 | -1.9305802 |
| H | -2.6299066 | -3.9949268 | -1.8853122 |
| H | -3.5752006 | -4.7076978 | -0.5610992 |
| C | -5.0188956 | -2.1505448 | 0.5332508  |

|            |            |            |            |
|------------|------------|------------|------------|
| H          | -5.0669906 | -1.1473748 | 0.9715208  |
| H          | -5.8770696 | -2.3024258 | -0.1325652 |
| H          | -5.0439026 | -2.8905308 | 1.3382128  |
| C          | -3.5727846 | -1.0239918 | -1.7098292 |
| H          | -2.8213076 | -1.2294758 | -2.4796862 |
| H          | -4.5690866 | -1.0307178 | -2.1699332 |
| H          | -3.3810726 | -0.0310808 | -1.2864142 |
| H          | 4.3026724  | -1.0662308 | 0.4948438  |
| H          | 1.1269904  | -2.7418658 | 1.6089078  |
| B          | 6.7041224  | -1.1557488 | 0.0920338  |
| F          | 7.1104714  | 0.1626892  | -0.0144762 |
| F          | 7.7503884  | -2.0286648 | 0.2023408  |
| F          | 5.8525334  | -1.2734518 | 1.2481528  |
| F          | 5.8826984  | -1.4822398 | -1.0146262 |
| <b>E-1</b> |            |            |            |
| C          | -4.2118459 | -1.8086415 | 2.7116655  |
| C          | -5.5059079 | -1.4531515 | 2.2915055  |
| C          | -5.7232329 | -0.8685035 | 1.0560225  |
| C          | -4.6074769 | -0.6405725 | 0.2514645  |
| C          | -3.2950119 | -0.9773905 | 0.6562085  |
| C          | -3.1065859 | -1.5824035 | 1.9101375  |
| N          | -4.5230099 | -0.0656375 | -0.9993715 |
| C          | -3.2123279 | -0.0076585 | -1.3812475 |
| C          | -2.4198399 | -0.5596915 | -0.4066575 |
| O          | 0.2134171  | -1.7502155 | 1.3133985  |
| C          | -0.3615289 | -1.8591175 | 0.2371815  |
| C          | -0.9280959 | -0.6060385 | -0.4546755 |

|   |            |            |            |
|---|------------|------------|------------|
| N | -0.4641719 | -3.0765535 | -0.3614285 |
| N | -0.3132969 | 0.5941335  | 0.1462965  |
| C | 0.9940241  | 0.8650915  | -0.0429675 |
| C | 1.7374401  | -0.1006125 | -0.8719495 |
| C | 2.3552201  | -1.0057165 | -1.4295415 |
| C | 2.9017351  | -2.1842785 | -2.0833255 |
| O | 1.6113611  | 1.8143085  | 0.4373255  |
| C | -1.1896639 | -3.6630245 | -1.5182545 |
| C | -0.4732169 | -4.9831635 | -1.7982825 |
| C | -2.6449449 | -3.9497785 | -1.1557675 |
| C | -1.1118229 | -2.7921855 | -2.7664535 |
| C | -2.8541349 | 3.9936035  | -0.7537615 |
| C | -4.1117129 | 3.9670425  | -0.1456395 |
| C | -4.3461079 | 3.0909045  | 0.9181035  |
| C | -3.3415289 | 2.2448115  | 1.3560775  |
| C | -2.0835389 | 2.2494825  | 0.7479585  |
| C | -1.8538089 | 3.1406345  | -0.2958185 |
| C | -1.0028439 | 1.3197285  | 1.2256845  |
| O | -5.1592169 | 4.7412385  | -0.5140905 |
| C | -4.9550129 | 5.6871355  | -1.5360395 |
| H | -4.0798309 | -2.2694695 | 3.6873775  |
| H | -6.3507399 | -1.6420665 | 2.9488305  |
| H | -6.7225159 | -0.5921585 | 0.7276835  |
| H | -2.1095299 | -1.8544245 | 2.2529745  |
| H | -5.2956019 | 0.3332005  | -1.5093795 |
| H | -2.9219509 | 0.4534245  | -2.3186685 |
| H | -0.6237059 | -0.6222825 | -1.5093955 |



|    |            |            |            |
|----|------------|------------|------------|
| H  | -0.0939569 | -3.7765385 | 0.2754305  |
| H  | 3.5292171  | -2.7438245 | -1.3807105 |
| H  | 3.5029261  | -1.9232805 | -2.9597085 |
| H  | 2.0798301  | -2.8384295 | -2.3978755 |
| H  | 0.5783451  | -4.8190975 | -2.0654495 |
| H  | -0.9591559 | -5.5081715 | -2.6272165 |
| H  | -0.5069989 | -5.6461045 | -0.9241765 |
| H  | -3.2058109 | -3.0265155 | -0.9794215 |
| H  | -3.1324229 | -4.4992285 | -1.9702435 |
| H  | -2.7036019 | -4.5622755 | -0.2482015 |
| H  | -1.4735269 | -3.3699295 | -3.6244495 |
| H  | -0.0792819 | -2.4862715 | -2.9834225 |
| H  | -1.7447909 | -1.9024525 | -2.6915315 |
| H  | -2.6433029 | 4.6762365  | -1.5719035 |
| H  | -5.3303669 | 3.0906055  | 1.3801375  |
| H  | -3.5440719 | 1.5525085  | 2.1736675  |
| H  | -0.8730889 | 3.1678185  | -0.7709975 |
| H  | -0.2200239 | 1.8698795  | 1.7582335  |
| H  | -1.4098179 | 0.5742995  | 1.9194305  |
| H  | -5.8995519 | 6.2199805  | -1.6598175 |
| H  | -4.6886399 | 5.2069575  | -2.4889335 |
| H  | -4.1695129 | 6.4082655  | -1.2696775 |
| Au | 3.9791581  | 0.5823505  | -0.6382735 |
| P  | 5.8023861  | 1.8801425  | -0.0155955 |
| C  | 5.4311231  | 2.6594015  | 1.5846385  |
| H  | 5.2828231  | 1.8749135  | 2.3342915  |
| H  | 6.2472611  | 3.3236975  | 1.8913595  |

|              |            |            |            |
|--------------|------------|------------|------------|
| H            | 4.4989121  | 3.2271545  | 1.4967945  |
| C            | 6.1647751  | 3.2497935  | -1.1579285 |
| H            | 6.9858801  | 3.8607365  | -0.7651065 |
| H            | 6.4446311  | 2.8549535  | -2.1390065 |
| H            | 5.2732111  | 3.8734495  | -1.2734255 |
| C            | 7.3753631  | 0.9928455  | 0.1984705  |
| H            | 8.1432701  | 1.6747385  | 0.5816675  |
| H            | 7.2268811  | 0.1703045  | 0.9046265  |
| H            | 7.7024591  | 0.5804125  | -0.7606215 |
| C            | 4.8710411  | -1.7726365 | 1.5652655  |
| C            | 5.2844071  | -1.0170445 | 2.6195905  |
| C            | 4.0971861  | -0.4932115 | 3.2225835  |
| C            | 3.0547651  | -0.9783285 | 2.4964115  |
| O            | 3.5150211  | -1.7659925 | 1.4919175  |
| H            | 5.3868471  | -2.3912895 | 0.8430745  |
| H            | 6.3051611  | -0.8819815 | 2.9565245  |
| H            | 4.0289501  | 0.1385375  | 4.0982865  |
| H            | 1.9766561  | -0.8873825 | 2.5481105  |
| <b>E-ts1</b> |            |            |            |
| C            | -0.0672112 | 2.7670137  | -3.2816717 |
| C            | 0.3723208  | 2.0996947  | -4.4360657 |
| C            | 1.0476708  | 0.8907757  | -4.3581477 |
| C            | 1.2700088  | 0.3708097  | -3.0859187 |
| C            | 0.8264288  | 1.0212007  | -1.9158407 |
| C            | 0.1496408  | 2.2403197  | -2.0183087 |
| N            | 1.9267748  | -0.7872793 | -2.6912767 |
| C            | 1.9162718  | -0.8807063 | -1.3401437 |

|    |            |            |            |
|----|------------|------------|------------|
| C  | 1.2193458  | 0.1883517  | -0.7996157 |
| N  | 1.5551228  | -1.1098283 | 2.3511123  |
| C  | 2.1620718  | -0.3129623 | 1.4489323  |
| C  | 1.2449028  | 0.6153947  | 0.6327523  |
| O  | 3.3604678  | -0.3089943 | 1.2040523  |
| N  | -0.1049442 | 0.7699527  | 1.1708363  |
| C  | -1.1684242 | 0.1339847  | 0.6357073  |
| C  | -0.8841872 | -0.8449003 | -0.4312517 |
| O  | -2.3307912 | 0.2771227  | 1.0133183  |
| C  | -1.2429032 | -1.8041993 | -1.1705737 |
| C  | -0.7742592 | -2.7617503 | -2.1895727 |
| Au | -3.3732942 | -1.8284463 | -0.6219167 |
| C  | 0.7534828  | 5.2265187  | 0.9732863  |
| C  | -0.4096272 | 5.6721757  | 0.3354423  |
| C  | -1.5561152 | 4.8714707  | 0.3470413  |
| C  | -1.5222042 | 3.6344897  | 0.9839733  |
| C  | -0.3648412 | 3.1756167  | 1.6117943  |
| C  | 0.7693348  | 3.9950167  | 1.6039883  |
| C  | -0.3239762 | 1.7976407  | 2.2050553  |
| O  | -0.3278202 | 6.8820367  | -0.2529477 |
| C  | -1.4716562 | 7.3861747  | -0.9037547 |
| C  | 2.2444598  | -2.1338463 | 3.1719813  |
| C  | 1.1679778  | -2.7871923 | 4.0275483  |
| C  | 3.2895498  | -1.4709703 | 4.0625343  |
| C  | 2.8853738  | -3.1728143 | 2.2565433  |
| H  | -0.5827482 | 3.7195557  | -3.3800027 |
| H  | 0.1866548  | 2.5424927  | -5.4111607 |

|   |            |            |            |
|---|------------|------------|------------|
| H | 1.3986398  | 0.3798687  | -5.2513577 |
| H | -0.1929002 | 2.7681447  | -1.1289287 |
| H | 2.4963718  | -1.3906193 | -3.2699027 |
| H | 2.4386578  | -1.6861993 | -0.8371307 |
| H | 0.5572918  | -1.0022473 | 2.4764433  |
| H | 1.7160398  | 1.6105247  | 0.6763423  |
| H | -1.2963662 | -3.7197183 | -2.1234927 |
| H | 0.3032298  | -2.9302043 | -2.0829967 |
| H | -0.9617242 | -2.3484853 | -3.1881247 |
| H | 1.6265878  | 5.8731707  | 0.9614163  |
| H | -2.4745922 | 5.2052007  | -0.1264887 |
| H | -2.4120592 | 3.0055387  | 0.9872703  |
| H | 1.6779388  | 3.6652107  | 2.1085573  |
| H | 0.4926728  | 1.7013017  | 2.9329793  |
| H | -1.2627472 | 1.5457207  | 2.7074963  |
| H | -1.1934882 | 8.3613037  | -1.3064517 |
| H | -2.3111832 | 7.5124537  | -0.2063217 |
| H | -1.7861492 | 6.7330767  | -1.7304457 |
| H | 0.4011458  | -3.2673243 | 3.4051373  |
| H | 0.6827528  | -2.0532483 | 4.6838943  |
| H | 1.6133868  | -3.5593363 | 4.6634243  |
| H | 4.0541038  | -0.9707373 | 3.4620953  |
| H | 2.8209968  | -0.7332183 | 4.7248173  |
| H | 3.7765878  | -2.2285563 | 4.6875883  |
| H | 3.6569078  | -2.7217003 | 1.6243033  |
| H | 2.1268258  | -3.6400563 | 1.6150633  |
| H | 3.3525598  | -3.9611393 | 2.8582593  |

|               |            |            |            |
|---------------|------------|------------|------------|
| P             | -5.6550432 | -1.9498283 | -0.1365327 |
| C             | -6.0743112 | -0.7065603 | 1.1266513  |
| H             | -7.1446182 | -0.7351123 | 1.3616893  |
| H             | -5.4920092 | -0.9005663 | 2.0327193  |
| H             | -5.8023472 | 0.2875647  | 0.7584913  |
| C             | -6.7605982 | -1.6027583 | -1.5413387 |
| H             | -6.6136922 | -2.3532953 | -2.3235447 |
| H             | -7.8064312 | -1.6206233 | -1.2132517 |
| H             | -6.5277512 | -0.6178563 | -1.9568527 |
| C             | -6.2300912 | -3.5399453 | 0.5393033  |
| H             | -5.6621162 | -3.7829053 | 1.4422063  |
| H             | -7.2965852 | -3.4821193 | 0.7861913  |
| H             | -6.0714832 | -4.3347503 | -0.1954397 |
| C             | 5.0423438  | -3.5546843 | -2.7186787 |
| C             | 6.1795828  | -3.7560093 | -2.0108757 |
| C             | 6.2013338  | -2.7483213 | -0.9970047 |
| C             | 5.0788218  | -2.0077533 | -1.1660537 |
| O             | 4.3514938  | -2.4908193 | -2.2191787 |
| H             | 4.5974858  | -4.0515763 | -3.5687927 |
| H             | 6.9180088  | -4.5258533 | -2.1874017 |
| H             | 6.9601678  | -2.5939923 | -0.2424757 |
| H             | 4.6634958  | -1.1548813 | -0.6410077 |
| <b>E-int4</b> |            |            |            |
| C             | 0.7797605  | 3.3367876  | -2.7583791 |
| C             | 1.8206635  | 2.9954866  | -3.6231591 |
| C             | 2.4325995  | 1.7452106  | -3.5544051 |
| C             | 1.9495165  | 0.8803066  | -2.5891641 |

|    |            |            |            |
|----|------------|------------|------------|
| C  | 0.9077115  | 1.1962326  | -1.7187781 |
| C  | 0.3090285  | 2.4418316  | -1.7961131 |
| N  | 2.3676455  | -0.4419284 | -2.2876001 |
| C  | 1.6916485  | -0.9378514 | -1.2924381 |
| C  | 0.6981805  | 0.0414556  | -0.7643731 |
| N  | 1.5783185  | -1.1027174 | 2.4957459  |
| C  | 1.9947025  | -0.5511194 | 1.3539219  |
| C  | 1.0625485  | 0.4780736  | 0.7074709  |
| O  | 3.0542335  | -0.8001384 | 0.7727129  |
| N  | -0.1981585 | 0.6602046  | 1.3662889  |
| C  | -1.2668315 | 0.1171136  | 0.6670069  |
| C  | -0.7468745 | -0.4635994 | -0.5968751 |
| O  | -2.4179305 | 0.1709336  | 1.0663069  |
| C  | -1.5002115 | -1.1816944 | -1.4536091 |
| C  | -0.9851475 | -1.6678924 | -2.7647541 |
| Au | -3.4788405 | -1.6239254 | -0.9598151 |
| C  | 0.6606035  | 5.0633146  | 0.8420059  |
| C  | -0.5261735 | 5.4840616  | 0.2319599  |
| C  | -1.6839525 | 4.7107146  | 0.3621719  |
| C  | -1.6363245 | 3.5198456  | 1.0821769  |
| C  | -0.4545575 | 3.0817446  | 1.6794789  |
| C  | 0.6889795  | 3.8786336  | 1.5583039  |
| C  | -0.4022485 | 1.7362426  | 2.3440599  |
| O  | -0.4520485 | 6.6411676  | -0.4596331 |
| C  | -1.6306155 | 7.1385166  | -1.0529181 |
| C  | 2.2914885  | -2.1640754 | 3.2501999  |
| C  | 1.4216035  | -2.4822694 | 4.4579879  |

|   |            |            |            |
|---|------------|------------|------------|
| C | 3.6511955  | -1.6463884 | 3.7035029  |
| C | 2.4380435  | -3.4019094 | 2.3694179  |
| H | 0.3282545  | 4.3238796  | -2.8277521 |
| H | 2.1634825  | 3.7151776  | -4.3611711 |
| H | 3.2464455  | 1.4714636  | -4.2202011 |
| H | -0.4982645 | 2.7238646  | -1.1206451 |
| H | 3.1139705  | -0.9791514 | -2.7402851 |
| H | 1.8339465  | -1.9654054 | -0.9716921 |
| H | 0.6434755  | -0.8446654 | 2.7949899  |
| H | 1.6316965  | 1.4197556  | 0.6674969  |
| H | -1.0653915 | -2.7606204 | -2.8255341 |
| H | 0.0528765  | -1.3865994 | -2.9964361 |
| H | -1.6183295 | -1.2848964 | -3.5751631 |
| H | 1.5413845  | 5.6919836  | 0.7418849  |
| H | -2.6219705 | 5.0283466  | -0.0833401 |
| H | -2.5338055 | 2.9088766  | 1.1729979  |
| H | 1.6160315  | 3.5692076  | 2.0424489  |
| H | 0.4078555  | 1.6876046  | 3.0846579  |
| H | -1.3444385 | 1.5038206  | 2.8522079  |
| H | -1.3602995 | 8.0783186  | -1.5369291 |
| H | -2.4097245 | 7.3324986  | -0.3033091 |
| H | -2.0260365 | 6.4455806  | -1.8098031 |
| H | 0.4338195  | -2.8508764 | 4.1525539  |
| H | 1.2881095  | -1.5986114 | 5.0942759  |
| H | 1.8956065  | -3.2617354 | 5.0632869  |
| H | 4.2809485  | -1.3865134 | 2.8480079  |
| H | 3.5359635  | -0.7600904 | 4.3380649  |

|   |            |            |            |
|---|------------|------------|------------|
| H | 4.1617005  | -2.4197504 | 4.2888279  |
| H | 3.0544955  | -3.1941464 | 1.4881989  |
| H | 1.4551005  | -3.7604624 | 2.0394519  |
| H | 2.9180255  | -4.2061134 | 2.9388779  |
| P | -5.7153965 | -2.0523454 | -0.2983441 |
| C | -6.1074375 | -1.1138924 | 1.2185739  |
| H | -7.1376685 | -1.2966804 | 1.5458119  |
| H | -5.4104115 | -1.4049464 | 2.0107619  |
| H | -5.9644325 | -0.0458704 | 1.0263529  |
| C | -7.0287355 | -1.5683174 | -1.4719641 |
| H | -6.9311355 | -2.1477424 | -2.3949161 |
| H | -8.0195565 | -1.7441544 | -1.0367231 |
| H | -6.9251285 | -0.5074864 | -1.7192621 |
| C | -6.1296795 | -3.7794434 | 0.1291409  |
| H | -5.4490275 | -4.1368014 | 0.9077729  |
| H | -7.1625515 | -3.8507884 | 0.4898749  |
| H | -6.0095105 | -4.4169614 | -0.7518811 |
| C | 4.6439655  | -3.5879364 | -3.2269601 |
| C | 5.4631395  | -4.3838794 | -2.5016331 |
| C | 5.5357665  | -3.8064464 | -1.1945751 |
| C | 4.7582795  | -2.6983454 | -1.2156621 |
| O | 4.1975025  | -2.5484694 | -2.4589121 |
| H | 4.2906635  | -3.6087274 | -4.2474531 |
| H | 5.9614545  | -5.2772634 | -2.8514421 |
| H | 6.1024175  | -4.1726984 | -0.3496891 |
| H | 4.4939985  | -1.9439154 | -0.4835451 |

**E-int1**



|    |            |            |            |
|----|------------|------------|------------|
| C  | 0.7812031  | -2.3400113 | 2.6412071  |
| C  | -0.2937589 | -1.7675283 | 3.3523701  |
| C  | -1.0594389 | -0.7200643 | 2.7932501  |
| C  | -0.7026409 | -0.2897133 | 1.5137131  |
| C  | 0.3696171  | -0.8464353 | 0.7890721  |
| C  | 1.1235791  | -1.8808843 | 1.3486911  |
| N  | -1.2982559 | 0.7409717  | 0.7118951  |
| C  | -0.5712119 | 0.9751497  | -0.3982579 |
| C  | 0.4897771  | -0.1398703 | -0.5624389 |
| N  | 0.7511841  | 2.4866807  | -0.0707459 |
| C  | 1.7153871  | 1.9950037  | -1.0288339 |
| C  | 1.9154511  | 0.4840607  | -0.8185459 |
| O  | 2.1897021  | 2.6703347  | -1.9458949 |
| N  | 2.4403751  | -0.1940903 | -1.9784419 |
| C  | 1.5167981  | -1.0173093 | -2.6205199 |
| C  | 0.2363171  | -1.0090633 | -1.8267449 |
| O  | 1.7939351  | -1.6686233 | -3.6562679 |
| C  | -0.9109679 | -1.6836013 | -2.1375189 |
| C  | -1.0445049 | -2.4710303 | -3.4372649 |
| Au | -2.5942069 | -1.9265563 | -0.9585609 |
| C  | 6.5085951  | -0.0356163 | 0.3771011  |
| C  | 6.6427331  | -1.4116023 | 0.6618241  |
| C  | 5.8718241  | -2.3570883 | -0.0508799 |
| C  | 4.9735951  | -1.9134153 | -1.0385369 |
| C  | 4.8251961  | -0.5426133 | -1.3330879 |
| C  | 5.6095531  | 0.3870067  | -0.6118869 |
| C  | 3.8522221  | -0.0778163 | -2.4071769 |

|   |            |            |            |
|---|------------|------------|------------|
| O | 7.5635111  | -1.7305083 | 1.6551491  |
| C | 7.8344461  | -3.1344223 | 1.9464571  |
| C | 0.3203231  | 3.9593877  | -0.0607979 |
| C | -0.6896679 | 4.1195347  | 1.0988311  |
| C | -0.3458839 | 4.3226037  | -1.4065599 |
| C | 1.5656061  | 4.8441947  | 0.2025481  |
| H | 1.3547091  | -3.1433533 | 3.0946551  |
| H | -0.5327579 | -2.1315513 | 4.3479341  |
| H | -1.8804149 | -0.2702093 | 3.3449861  |
| H | 1.9503411  | -2.3315753 | 0.8059741  |
| H | -2.2077379 | 1.1731437  | 0.8980471  |
| H | -1.0273039 | 1.4620917  | -1.2503979 |
| H | 2.5733901  | 0.3433247  | 0.0530541  |
| H | -1.1617449 | -3.5407783 | -3.2072699 |
| H | -0.1871349 | -2.3565803 | -4.1023349 |
| H | -1.9617159 | -2.1669163 | -3.9603589 |
| H | 7.1256381  | 0.6693107  | 0.9257771  |
| H | 5.9773411  | -3.4205983 | 0.1388221  |
| H | 4.3978921  | -2.6463313 | -1.6013219 |
| H | 5.5347521  | 1.4485927  | -0.8431969 |
| H | 4.0549301  | 0.9610097  | -2.6900569 |
| H | 3.9252391  | -0.6957073 | -3.3086719 |
| H | 8.6028921  | -3.1224643 | 2.7210711  |
| H | 8.2125191  | -3.6569843 | 1.0576051  |
| H | 6.9366211  | -3.6430003 | 2.3243111  |
| H | -0.2641799 | 3.7951347  | 2.0592111  |
| H | -1.6159439 | 3.5648067  | 0.9146301  |

|   |            |            |            |
|---|------------|------------|------------|
| H | -0.9516469 | 5.1783367  | 1.1987801  |
| H | 0.3446621  | 4.2122097  | -2.2457299 |
| H | -1.2410299 | 3.7163517  | -1.5955629 |
| H | -0.6666939 | 5.3698407  | -1.3677319 |
| H | 2.3007311  | 4.7518447  | -0.6007769 |
| H | 2.0445831  | 4.5856977  | 1.1567811  |
| H | 1.2560711  | 5.8943017  | 0.2612471  |
| P | -4.6449679 | -2.5590793 | 0.2715641  |
| C | -4.9645359 | -1.6991853 | 1.9156751  |
| H | -5.8832619 | -2.0810183 | 2.3747251  |
| H | -4.1223399 | -1.8827153 | 2.5897991  |
| H | -5.0632709 | -0.6213463 | 1.7540751  |
| C | -6.2487309 | -2.3093083 | -0.6812089 |
| H | -6.1924809 | -2.8402853 | -1.6362349 |
| H | -7.1004069 | -2.6899883 | -0.1063989 |
| H | -6.3966519 | -1.2435573 | -0.8805919 |
| C | -4.6687109 | -4.3880423 | 0.7142491  |
| H | -3.8108769 | -4.6228543 | 1.3514871  |
| H | -5.5945439 | -4.6455963 | 1.2407041  |
| H | -4.5951739 | -4.9853153 | -0.1996059 |
| H | 0.9757941  | 2.1734747  | 0.8813451  |
| C | -4.7127269 | 2.8946677  | 1.2683271  |
| C | -5.7630699 | 3.2368367  | 0.4572741  |
| C | -5.6647669 | 2.4233337  | -0.7418689 |
| C | -4.5605549 | 1.6233717  | -0.6033009 |
| O | -3.9414419 | 1.8919997  | 0.6403041  |
| H | -4.3761769 | 3.2146927  | 2.2414141  |

|              |            |            |            |
|--------------|------------|------------|------------|
| H            | -6.5209439 | 3.9750717  | 0.6744551  |
| H            | -6.3335839 | 2.4450337  | -1.5899109 |
| H            | -4.0909759 | 0.8627997  | -1.2089029 |
| <b>E-ts2</b> |            |            |            |
| C            | 1.7733068  | -2.2366688 | 2.1212073  |
| C            | 0.6821868  | -2.0886078 | 2.9759433  |
| C            | -0.3652162 | -1.2152278 | 2.6711273  |
| C            | -0.2707242 | -0.5178368 | 1.4794933  |
| C            | 0.8085088  | -0.6615458 | 0.6130713  |
| C            | 1.8470348  | -1.5209368 | 0.9246793  |
| N            | -1.1711102 | 0.4259792  | 0.9215763  |
| C            | -0.6566482 | 0.9866162  | -0.1885687 |
| C            | 0.6146338  | 0.2328732  | -0.5870807 |
| N            | 0.1653318  | 2.6662322  | 0.2327023  |
| C            | 1.2064798  | 2.6202902  | -0.7825747 |
| C            | 1.7923668  | 1.2234482  | -0.7830017 |
| O            | 1.4578728  | 3.5170072  | -1.5330377 |
| N            | 2.4216018  | 0.8727222  | -2.0097357 |
| C            | 1.7586488  | -0.1388448 | -2.6953227 |
| C            | 0.5213148  | -0.4783228 | -1.9363127 |
| O            | 2.2026718  | -0.6491428 | -3.7056757 |
| C            | -0.4474602 | -1.3398898 | -2.3149537 |
| C            | -0.4420652 | -1.9831258 | -3.6698577 |
| Au           | -2.0147322 | -2.0056598 | -1.1157397 |
| C            | 5.7355458  | -0.0990048 | 0.8964183  |
| C            | 5.8735678  | -1.4647728 | 0.6297803  |
| C            | 5.4022278  | -1.9842628 | -0.5805697 |

|   |            |            |            |
|---|------------|------------|------------|
| C | 4.7889098  | -1.1380838 | -1.5002197 |
| C | 4.6385718  | 0.2254072  | -1.2427617 |
| C | 5.1287358  | 0.7302552  | -0.0335577 |
| C | 3.8575218  | 1.0886892  | -2.1947917 |
| O | 6.4736388  | -2.1948348 | 1.5945843  |
| C | 6.6982168  | -3.5642388 | 1.3482233  |
| C | -0.6677532 | 3.9138612  | 0.4261693  |
| C | -1.6439102 | 3.6175022  | 1.5573013  |
| C | -1.4303102 | 4.2312712  | -0.8520407 |
| C | 0.2538268  | 5.0605612  | 0.8285703  |
| H | 2.5809258  | -2.9126598 | 2.3899883  |
| H | 0.6490998  | -2.6510338 | 3.9053963  |
| H | -1.2046712 | -1.0794678 | 3.3497383  |
| H | 2.6988428  | -1.6346428 | 0.2519263  |
| H | -2.1472032 | 0.5275042  | 1.1845013  |
| H | -1.3415662 | 1.3710062  | -0.9445387 |
| H | 2.5014878  | 1.1499552  | 0.0651013  |
| H | 0.3387908  | -1.6094178 | -4.3358997 |
| H | -1.4239502 | -1.8633058 | -4.1449827 |
| H | -0.3029372 | -3.0670548 | -3.5537437 |
| H | 6.1269248  | 0.2837682  | 1.8353603  |
| H | 5.5180978  | -3.0373588 | -0.8195497 |
| H | 4.4141998  | -1.5437918 | -2.4395567 |
| H | 5.0451078  | 1.7980702  | 0.1744443  |
| H | 4.0741598  | 2.1549422  | -2.0531497 |
| H | 4.0633488  | 0.8354312  | -3.2397527 |
| H | 7.2110478  | -3.9569108 | 2.2277663  |

|   |            |            |            |
|---|------------|------------|------------|
| H | 7.3329288  | -3.7175208 | 0.4648353  |
| H | 5.7546498  | -4.1116878 | 1.2090503  |
| H | -1.1262412 | 3.3022532  | 2.4734143  |
| H | -2.3772332 | 2.8514712  | 1.2804023  |
| H | -2.2033322 | 4.5295442  | 1.7919883  |
| H | -0.7622092 | 4.4378612  | -1.6913527 |
| H | -2.1237552 | 3.4249222  | -1.1244937 |
| H | -2.0383902 | 5.1256962  | -0.6758607 |
| H | 0.9622708  | 5.3105012  | 0.0353633  |
| H | 0.8102748  | 4.8185012  | 1.7434033  |
| H | -0.3512432 | 5.9495132  | 1.0390523  |
| P | -3.8330352 | -2.9333588 | 0.1499253  |
| C | -3.8351782 | -2.5135468 | 1.9295003  |
| H | -4.6625712 | -3.0122548 | 2.4478633  |
| H | -2.8849262 | -2.8227178 | 2.3776543  |
| H | -3.9460522 | -1.4286078 | 2.0383783  |
| C | -5.5075002 | -2.4514248 | -0.4013717 |
| H | -5.6425232 | -2.7222948 | -1.4529957 |
| H | -6.2718342 | -2.9550618 | 0.2020483  |
| H | -5.6290302 | -1.3671208 | -0.3037157 |
| C | -3.8719162 | -4.7592868 | 0.1325953  |
| H | -2.9364522 | -5.1497738 | 0.5448973  |
| H | -4.7151672 | -5.1355578 | 0.7235103  |
| H | -3.9663952 | -5.1145638 | -0.8981387 |
| H | 0.5649868  | 2.3817522  | 1.1337113  |
| C | -4.8494322 | 1.9369602  | 1.1709963  |
| C | -5.2686952 | 2.7468402  | 0.1691303  |

|   |            |           |            |
|---|------------|-----------|------------|
| C | -4.7908692 | 2.1644402 | -1.0470087 |
| C | -4.1116272 | 1.0442622 | -0.6959707 |
| O | -4.1333922 | 0.8874222 | 0.6659083  |
| H | -4.9720012 | 1.9513582 | 2.2444903  |
| H | -5.8611542 | 3.6451242 | 0.2756753  |
| H | -4.9480602 | 2.5287302 | -2.0532737 |
| H | -3.5993932 | 0.2608812 | -1.2477027 |

**E-int2**

|   |            |            |            |
|---|------------|------------|------------|
| C | -0.0807733 | -2.8388037 | 2.5078740  |
| C | -1.1190713 | -2.2740507 | 3.2495150  |
| C | -1.5982683 | -0.9958427 | 2.9621930  |
| C | -1.0144043 | -0.3093317 | 1.9062150  |
| C | 0.0300697  | -0.8584107 | 1.1679730  |
| C | 0.5062137  | -2.1275047 | 1.4625340  |
| N | -1.3487163 | 0.9948173  | 1.4518240  |
| C | -0.4341813 | 1.3394973  | 0.4009220  |
| C | 0.4751587  | 0.1018243  | 0.0991700  |
| N | 0.4796917  | 2.4578173  | 0.9205790  |
| C | 1.8943627  | 1.8623823  | 1.0329120  |
| C | 1.9257857  | 0.5713093  | 0.2695890  |
| O | 2.7370477  | 2.4247973  | 1.6528160  |
| N | 2.3788607  | 0.8632273  | -1.0671250 |
| C | 1.6111867  | 0.1886843  | -2.0327590 |
| C | 0.4013177  | -0.3372017 | -1.3555380 |
| O | 1.9625797  | 0.1155313  | -3.1937290 |
| C | -0.6198483 | -1.0226267 | -1.9180480 |
| C | -0.6333633 | -1.3686737 | -3.3758010 |

|    |            |            |            |
|----|------------|------------|------------|
| Au | -2.2950923 | -1.6642097 | -0.8532410 |
| C  | 6.1689567  | -0.8680047 | 0.8394070  |
| C  | 6.3428037  | -2.0131567 | 0.0542630  |
| C  | 5.6923427  | -2.1135257 | -1.1788570 |
| C  | 4.8812157  | -1.0707007 | -1.6134770 |
| C  | 4.7070397  | 0.0782733  | -0.8429090 |
| C  | 5.3603387  | 0.1625753  | 0.3916830  |
| C  | 3.7911877  | 1.1705313  | -1.3143060 |
| O  | 7.1527607  | -2.9604417 | 0.5715780  |
| C  | 7.3982967  | -4.1171617 | -0.1956140 |
| C  | 0.3468257  | 3.8561443  | 0.2316890  |
| C  | -1.1214833 | 4.2462093  | 0.3410200  |
| C  | 0.8060037  | 3.7455773  | -1.2082930 |
| C  | 1.1991987  | 4.8466523  | 1.0100270  |
| H  | 0.2805667  | -3.8330627 | 2.7554010  |
| H  | -1.5501333 | -2.8299697 | 4.0792980  |
| H  | -2.3836023 | -0.5395027 | 3.5617030  |
| H  | 1.3110867  | -2.5628197 | 0.8717130  |
| H  | -2.3223823 | 1.1197043  | 1.1837800  |
| H  | -0.9408643 | 1.7064983  | -0.4938340 |
| H  | 2.5806737  | -0.1453597 | 0.7932480  |
| H  | -0.6762613 | -2.4604357 | -3.4871580 |
| H  | 0.2242487  | -0.9877677 | -3.9354460 |
| H  | -1.5605693 | -1.0001117 | -3.8365890 |
| H  | 6.6899027  | -0.8137917 | 1.7916830  |
| H  | 5.8194547  | -2.9895567 | -1.8077890 |
| H  | 4.3775087  | -1.1453957 | -2.5768510 |



|   |            |            |            |
|---|------------|------------|------------|
| H | 5.2345367  | 1.0548533  | 1.0064350  |
| H | 4.0359897  | 2.1237203  | -0.8232820 |
| H | 3.8635357  | 1.3199943  | -2.3972240 |
| H | 8.0822807  | -4.7354667 | 0.3880160  |
| H | 7.8689917  | -3.8713107 | -1.1574060 |
| H | 6.4747327  | -4.6829277 | -0.3825530 |
| H | -1.4580433 | 4.2529803  | 1.3862950  |
| H | -1.7886113 | 3.6029853  | -0.2420190 |
| H | -1.2329653 | 5.2648123  | -0.0452650 |
| H | 1.8643897  | 3.4718173  | -1.2824260 |
| H | 0.2236727  | 3.0239063  | -1.7922370 |
| H | 0.6805577  | 4.7259433  | -1.6802580 |
| H | 2.2690527  | 4.6444483  | 0.9276250  |
| H | 0.9313847  | 4.8693043  | 2.0735490  |
| H | 1.0114897  | 5.8451153  | 0.6011530  |
| P | -4.2678783 | -2.4178057 | 0.2687290  |
| C | -5.0098783 | -1.2035197 | 1.4166260  |
| H | -5.9079703 | -1.6167797 | 1.8911060  |
| H | -4.2798213 | -0.9496847 | 2.1930580  |
| H | -5.2780923 | -0.2928057 | 0.8672260  |
| C | -5.6552983 | -2.8490737 | -0.8383140 |
| H | -5.3459043 | -3.6369307 | -1.5317230 |
| H | -6.5225183 | -3.1928997 | -0.2624590 |
| H | -5.9344613 | -1.9650867 | -1.4210400 |
| C | -4.0341123 | -3.9055497 | 1.3022980  |
| H | -3.2616283 | -3.7006267 | 2.0520090  |
| H | -4.9683473 | -4.1872697 | 1.8021940  |

|   |            |            |            |
|---|------------|------------|------------|
| H | -3.6928493 | -4.7363947 | 0.6770870  |
| H | 0.1778627  | 2.6080683  | 1.8938020  |
| C | -4.6112943 | 2.3661823  | 0.1127850  |
| C | -5.7707063 | 2.0480363  | -0.5141070 |
| C | -5.4059013 | 1.2667263  | -1.6562140 |
| C | -4.0524263 | 1.1691943  | -1.6371610 |
| O | -3.5478483 | 1.8344693  | -0.5592020 |
| H | -4.3691173 | 2.9470043  | 0.9931630  |
| H | -6.7665283 | 2.3426133  | -0.2124240 |
| H | -6.0677723 | 0.8560803  | -2.4068140 |
| H | -3.3221753 | 0.7012433  | -2.2842720 |

**E-ts3**

|   |            |            |            |
|---|------------|------------|------------|
| C | 0.0201438  | -2.6839843 | 2.5376339  |
| C | -0.9764202 | -2.0588783 | 3.2906509  |
| C | -1.4516812 | -0.7960983 | 2.9406999  |
| C | -0.9021662 | -0.2004923 | 1.8159659  |
| C | 0.0919388  | -0.8043683 | 1.0581959  |
| C | 0.5662548  | -2.0582543 | 1.4199669  |
| N | -1.2346992 | 1.0994087  | 1.2900459  |
| C | -0.4100612 | 1.2951357  | 0.0575149  |
| C | 0.5243078  | 0.0697167  | -0.0861971 |
| N | 0.3777258  | 2.4555847  | 0.5641339  |
| C | 1.7834458  | 2.0296007  | 0.6899209  |
| C | 1.9360208  | 0.6447527  | 0.0998429  |
| O | 2.6419088  | 2.7217767  | 1.1523009  |
| N | 2.4397888  | 0.7939917  | -1.2453481 |
| C | 1.7593068  | -0.0234203 | -2.1567171 |

|    |            |            |            |
|----|------------|------------|------------|
| C  | 0.5248808  | -0.5095223 | -1.4883011 |
| O  | 2.1724168  | -0.2336873 | -3.2803101 |
| C  | -0.4691672 | -1.2527743 | -2.0211401 |
| C  | -0.4198042 | -1.7539353 | -3.4311791 |
| Au | -2.1693022 | -1.7973603 | -0.9431111 |
| C  | 6.2115178  | -0.5578473 | 0.9756329  |
| C  | 6.4646268  | -1.7683423 | 0.3213789  |
| C  | 5.8704608  | -2.0245683 | -0.9172681 |
| C  | 5.0360728  | -1.0691803 | -1.4884881 |
| C  | 4.7838738  | 0.1442337  | -0.8495771 |
| C  | 5.3807058  | 0.3842437  | 0.3929979  |
| C  | 3.8468468  | 1.1424417  | -1.4671031 |
| O  | 7.2911748  | -2.6208273 | 0.9651319  |
| C  | 7.6185708  | -3.8350653 | 0.3300519  |
| C  | 0.0919658  | 3.8528647  | -0.0061441 |
| C  | -1.4189192 | 4.0551177  | -0.0318001 |
| C  | 0.6818568  | 3.9232047  | -1.4052611 |
| C  | 0.7068838  | 4.8938857  | 0.9197599  |
| H  | 0.3790748  | -3.6658913 | 2.8339199  |
| H  | -1.3773012 | -2.5550093 | 4.1710609  |
| H  | -2.2085152 | -0.2914113 | 3.5377839  |
| H  | 1.3384428  | -2.5416983 | 0.8240289  |
| H  | -2.2374342 | 1.2627117  | 1.1418849  |
| H  | -1.0034772 | 1.5082267  | -0.8336531 |
| H  | 2.6017968  | 0.0324657  | 0.7305219  |
| H  | -0.4605652 | -2.8514663 | -3.4289561 |
| H  | 0.4680448  | -1.4329353 | -3.9815321 |

|   |            |            |            |
|---|------------|------------|------------|
| H | -1.3199302 | -1.4332943 | -3.9722331 |
| H | 6.6901418  | -0.3825213 | 1.9355709  |
| H | 6.0595378  | -2.9541483 | -1.4458401 |
| H | 4.5749898  | -1.2643613 | -2.4564211 |
| H | 5.1899448  | 1.3284247  | 0.9044779  |
| H | 4.0261838  | 2.1481497  | -1.0646821 |
| H | 3.9628388  | 1.1839917  | -2.5553381 |
| H | 8.3053418  | -4.3581453 | 0.9977099  |
| H | 8.1160328  | -3.6654273 | -0.6348451 |
| H | 6.7296158  | -4.4613163 | 0.1687119  |
| H | -1.8545942 | 3.9844337  | 0.9738139  |
| H | -1.9498322 | 3.3648517  | -0.6967081 |
| H | -1.6206002 | 5.0664377  | -0.3996241 |
| H | 1.7707198  | 3.7993927  | -1.3897581 |
| H | 0.2574758  | 3.1625597  | -2.0727551 |
| H | 0.4649038  | 4.9049547  | -1.8402751 |
| H | 1.7964208  | 4.8549607  | 0.9324559  |
| H | 0.3439088  | 4.7711147  | 1.9471519  |
| H | 0.4000718  | 5.8859657  | 0.5707449  |
| P | -4.1301642 | -2.5322423 | 0.2320929  |
| C | -4.8968852 | -1.3445743 | 1.3933559  |
| H | -5.7033052 | -1.8287333 | 1.9567859  |
| H | -4.1402732 | -0.9743343 | 2.0942649  |
| H | -5.3100272 | -0.4978873 | 0.8337169  |
| C | -5.5277442 | -3.0223633 | -0.8366981 |
| H | -5.2080502 | -3.8050243 | -1.5312631 |
| H | -6.3674512 | -3.3912963 | -0.2361411 |

|   |            |            |            |
|---|------------|------------|------------|
| H | -5.8543972 | -2.1546583 | -1.4194741 |
| C | -3.8132422 | -4.0022213 | 1.2702299  |
| H | -3.0450782 | -3.7560113 | 2.0118169  |
| H | -4.7266442 | -4.3276783 | 1.7818119  |
| H | -3.4368242 | -4.8184743 | 0.6459199  |
| H | -0.3972092 | 2.1335547  | 1.5583819  |
| C | -5.0187782 | 2.2542027  | 0.5896949  |
| C | -6.0505452 | 2.1204867  | -0.2778641 |
| C | -5.5453382 | 1.3831347  | -1.3947831 |
| C | -4.2423682 | 1.1225017  | -1.1258251 |
| O | -3.9000582 | 1.6468297  | 0.0912529  |
| H | -4.9093372 | 2.7323547  | 1.5526209  |
| H | -7.0520382 | 2.5066477  | -0.1475731 |
| H | -6.0831782 | 1.1004527  | -2.2895211 |
| H | -3.4547742 | 0.5969677  | -1.6538991 |

**E-int3**

|   |            |            |            |
|---|------------|------------|------------|
| C | 0.0849190  | -2.5683440 | 2.6028117  |
| C | -0.9493100 | -1.9665140 | 3.3255007  |
| C | -1.4726800 | -0.7392690 | 2.9264117  |
| C | -0.9119600 | -0.1621180 | 1.7991727  |
| C | 0.1198890  | -0.7253720 | 1.0744877  |
| C | 0.6281420  | -1.9553620 | 1.4787917  |
| N | -1.3393910 | 1.0994920  | 1.1833037  |
| C | -0.2798340 | 1.4293840  | 0.0768777  |
| C | 0.5488930  | 0.1236480  | -0.0810783 |
| N | 0.5784940  | 2.4609270  | 0.5293147  |
| C | 1.9154810  | 2.0362600  | 0.5640347  |

|    |            |            |            |
|----|------------|------------|------------|
| C  | 1.9944630  | 0.6169800  | 0.0340917  |
| O  | 2.8657480  | 2.7194410  | 0.8614177  |
| N  | 2.4521860  | 0.6783810  | -1.3350943 |
| C  | 1.6747490  | -0.0748600 | -2.2055783 |
| C  | 0.4442590  | -0.4849770 | -1.4690133 |
| O  | 2.0006170  | -0.3143170 | -3.3533083 |
| C  | -0.5889770 | -1.2174330 | -1.9332793 |
| C  | -0.6268020 | -1.7342600 | -3.3408423 |
| Au | -2.2600970 | -1.7561090 | -0.8065963 |
| C  | 6.2766320  | -0.6538140 | 0.7860617  |
| C  | 6.4718100  | -1.9018630 | 0.1853887  |
| C  | 5.8203830  | -2.2040150 | -1.0131293 |
| C  | 4.9866480  | -1.2554160 | -1.5975263 |
| C  | 4.7913750  | -0.0054530 | -1.0124213 |
| C  | 5.4456110  | 0.2805240  | 0.1907887  |
| C  | 3.8512470  | 0.9847370  | -1.6399823 |
| O  | 7.3033200  | -2.7442450 | 0.8388797  |
| C  | 7.5765800  | -3.9940150 | 0.2506217  |
| C  | 0.2405480  | 3.9168200  | 0.3213467  |
| C  | -1.2730930 | 4.1143310  | 0.3733347  |
| C  | 0.7719860  | 4.3233930  | -1.0491143 |
| C  | 0.8593720  | 4.7532940  | 1.4367917  |
| H  | 0.4791340  | -3.5251590 | 2.9343117  |
| H  | -1.3416610 | -2.4527590 | 4.2147917  |
| H  | -2.2689160 | -0.2542620 | 3.4879237  |
| H  | 1.4331600  | -2.4231700 | 0.9152307  |
| H  | -2.2729740 | 1.0343720  | 0.7383657  |

|   |            |            |            |
|---|------------|------------|------------|
| H | -0.8654040 | 1.6747240  | -0.8170253 |
| H | 2.6501990  | -0.0069110 | 0.6630637  |
| H | -0.7062640 | -2.8294980 | -3.3308763 |
| H | 0.2427000  | -1.4449610 | -3.9359253 |
| H | -1.5400770 | -1.3821600 | -3.8409753 |
| H | 6.7994570  | -0.4435290 | 1.7155367  |
| H | 5.9647110  | -3.1632810 | -1.5014033 |
| H | 4.4830010  | -1.4867420 | -2.5359833 |
| H | 5.2962730  | 1.2528680  | 0.6607317  |
| H | 4.0678930  | 2.0037920  | -1.2969403 |
| H | 3.9173840  | 0.9645910  | -2.7329963 |
| H | 8.2771380  | -4.5029570 | 0.9150857  |
| H | 8.0387860  | -3.8829190 | -0.7401243 |
| H | 6.6677210  | -4.6051200 | 0.1533067  |
| H | -1.6831590 | 3.9030850  | 1.3730497  |
| H | -1.8268540 | 3.5386040  | -0.3775893 |
| H | -1.4852740 | 5.1705600  | 0.1781137  |
| H | 1.8597460  | 4.2051860  | -1.0961193 |
| H | 0.3227250  | 3.7161420  | -1.8462283 |
| H | 0.5376500  | 5.3743980  | -1.2520963 |
| H | 1.9487510  | 4.7186440  | 1.4179467  |
| H | 0.5198670  | 4.4000920  | 2.4184937  |
| H | 0.5357300  | 5.7939190  | 1.3201137  |
| P | -4.2454630 | -2.4564070 | 0.3473567  |
| C | -5.0620100 | -1.1801510 | 1.3741617  |
| H | -5.9325990 | -1.5997460 | 1.8921367  |
| H | -4.3553030 | -0.8003860 | 2.1208857  |

|              |            |            |            |
|--------------|------------|------------|------------|
| H            | -5.3903500 | -0.3476790 | 0.7401937  |
| C            | -5.5866370 | -3.0192610 | -0.7568413 |
| H            | -5.2345990 | -3.8537220 | -1.3709353 |
| H            | -6.4611330 | -3.3391560 | -0.1782973 |
| H            | -5.8726950 | -2.1979430 | -1.4221863 |
| C            | -3.9996730 | -3.8482790 | 1.5052327  |
| H            | -3.2625350 | -3.5615440 | 2.2630917  |
| H            | -4.9411090 | -4.1235060 | 1.9949947  |
| H            | -3.6098030 | -4.7132370 | 0.9597777  |
| H            | -1.3516060 | 1.8781610  | 1.8494307  |
| C            | -4.8356270 | 2.2093630  | 0.0744077  |
| C            | -5.8858950 | 2.0240940  | -0.7598293 |
| C            | -5.3941410 | 1.2593300  | -1.8654073 |
| C            | -4.0797560 | 1.0345210  | -1.6262383 |
| O            | -3.7157960 | 1.6078350  | -0.4357153 |
| H            | -4.7080920 | 2.7311740  | 1.0127687  |
| H            | -6.8907810 | 2.3975050  | -0.6182533 |
| H            | -5.9484210 | 0.9413200  | -2.7378533 |
| H            | -3.2886240 | 0.5303090  | -2.1671323 |
| <b>E-ts4</b> |            |            |            |
| C            | -0.9383268 | -1.1720388 | 3.1556596  |
| C            | -2.1206308 | -0.4350338 | 3.1628866  |
| C            | -2.4131238 | 0.4675202  | 2.1337026  |
| C            | -1.4672388 | 0.5914822  | 1.1379496  |
| C            | -0.2802768 | -0.1363478 | 1.1074326  |
| C            | -0.0031568 | -1.0333508 | 2.1232516  |
| N            | -1.5066368 | 1.3802572  | -0.0619494 |



|    |            |            |            |
|----|------------|------------|------------|
| C  | -0.0943058 | 1.6980802  | -0.3759854 |
| C  | 0.4911152  | 0.2742732  | -0.1176164 |
| N  | 0.7109402  | 2.5457342  | 0.4585986  |
| C  | 2.0009732  | 2.0051572  | 0.5117226  |
| C  | 1.9619992  | 0.5573912  | 0.0054276  |
| O  | 3.0057792  | 2.5814252  | 0.8617066  |
| N  | 2.4120882  | 0.4354102  | -1.3695064 |
| C  | 1.5243692  | -0.2256548 | -2.2005304 |
| C  | 0.2453022  | -0.4042078 | -1.4304054 |
| O  | 1.7519042  | -0.5709888 | -3.3436084 |
| C  | -1.0093688 | -0.6632558 | -1.8784444 |
| C  | -1.2790928 | -0.9173978 | -3.3391854 |
| Au | -2.4343028 | -1.7621778 | -0.6795404 |
| C  | 6.1085082  | -1.0356438 | 0.8126536  |
| C  | 6.2850092  | -2.3023418 | 0.2447476  |
| C  | 5.6634062  | -2.6122338 | -0.9675374 |
| C  | 4.8782122  | -1.6524278 | -1.5987644 |
| C  | 4.7041642  | -0.3852878 | -1.0471084 |
| C  | 5.3274092  | -0.0899838 | 0.1707246  |
| C  | 3.8209112  | 0.6226812  | -1.7240634 |
| O  | 7.0699542  | -3.1529518 | 0.9417756  |
| C  | 7.3225172  | -4.4246918 | 0.3915296  |
| C  | 0.4988802  | 4.0269362  | 0.5712056  |
| C  | -0.9926998 | 4.3264832  | 0.4642406  |
| C  | 1.2498822  | 4.7398972  | -0.5488784 |
| C  | 0.9813932  | 4.4813652  | 1.9451346  |
| H  | -0.7306068 | -1.8560678 | 3.9749316  |

|   |            |            |            |
|---|------------|------------|------------|
| H | -2.8200478 | -0.5494498 | 3.9878446  |
| H | -3.3299138 | 1.0543222  | 2.1202116  |
| H | 0.9209282  | -1.6069668 | 2.1314276  |
| H | -1.6485638 | 0.4535722  | -0.9969714 |
| H | -0.0726398 | 2.0063712  | -1.4333424 |
| H | 2.5360112  | -0.0948068 | 0.6815936  |
| H | -1.2525278 | -1.9936478 | -3.5556004 |
| H | -0.5317618 | -0.4504318 | -3.9898824 |
| H | -2.2822148 | -0.5713998 | -3.6154204 |
| H | 6.6081662  | -0.8204768 | 1.7536246  |
| H | 5.7925712  | -3.5865038 | -1.4293654 |
| H | 4.3969062  | -1.8912568 | -2.5471854 |
| H | 5.1913402  | 0.8973412  | 0.6136876  |
| H | 4.1094782  | 1.6446462  | -1.4485714 |
| H | 3.8648502  | 0.5308912  | -2.8146314 |
| H | 7.9874792  | -4.9373318 | 1.0887706  |
| H | 7.8170142  | -4.3511088 | -0.5870044 |
| H | 6.3987022  | -5.0105128 | 0.2817326  |
| H | -1.5642058 | 3.7977462  | 1.2414736  |
| H | -1.4062938 | 4.0987962  | -0.5278724 |
| H | -1.1443768 | 5.3991002  | 0.6246456  |
| H | 2.3270252  | 4.5671522  | -0.4719484 |
| H | 0.9064432  | 4.4035692  | -1.5361024 |
| H | 1.0726632  | 5.8196832  | -0.4868464 |
| H | 2.0524592  | 4.3150962  | 2.0722556  |
| H | 0.4439832  | 3.9440372  | 2.7355886  |
| H | 0.7796342  | 5.5525022  | 2.0601526  |

|            |            |            |            |
|------------|------------|------------|------------|
| P          | -3.9318628 | -3.1840678 | 0.4620306  |
| C          | -5.3517098 | -2.2931928 | 1.1864346  |
| H          | -5.9894508 | -2.9785318 | 1.7569896  |
| H          | -4.9830178 | -1.5022308 | 1.8485606  |
| H          | -5.9433908 | -1.8348558 | 0.3871466  |
| C          | -4.6878908 | -4.5057688 | -0.5408104 |
| H          | -3.9054208 | -5.1507938 | -0.9517344 |
| H          | -5.3676878 | -5.1087138 | 0.0724126  |
| H          | -5.2456428 | -4.0671908 | -1.3737624 |
| C          | -3.1750118 | -4.0513628 | 1.8762066  |
| H          | -2.7692998 | -3.3120238 | 2.5749716  |
| H          | -3.9175708 | -4.6747048 | 2.3879286  |
| H          | -2.3527628 | -4.6820718 | 1.5246656  |
| H          | -2.1964318 | 2.1297812  | -0.1234104 |
| C          | -4.4720788 | 2.7620832  | -0.3325944 |
| C          | -5.0462838 | 1.5316422  | -0.3977844 |
| C          | -4.6200918 | 0.9552802  | -1.6351854 |
| C          | -3.8179388 | 1.8794272  | -2.2261084 |
| O          | -3.7094628 | 2.9837732  | -1.4412914 |
| H          | -4.5280488 | 3.5812202  | 0.3714246  |
| H          | -5.7182598 | 1.1001392  | 0.3330036  |
| H          | -4.8907528 | -0.0116308 | -2.0408814 |
| H          | -3.2779918 | 1.9108512  | -3.1626364 |
| <b>E-2</b> |            |            |            |
| C          | 0.7675121  | -3.0960684 | -2.2997158 |
| C          | 2.0825651  | -3.5191024 | -2.1094418 |
| C          | 2.8936401  | -2.9643364 | -1.1218748 |

|    |            |            |            |
|----|------------|------------|------------|
| C  | 2.3495431  | -1.9711174 | -0.3108598 |
| C  | 1.0249651  | -1.5559144 | -0.4774848 |
| C  | 0.2348941  | -2.1020384 | -1.4781928 |
| N  | 2.9451301  | -1.2874024 | 0.7395882  |
| C  | 2.1505001  | -0.1279024 | 1.0787652  |
| C  | 0.7202961  | -0.5163574 | 0.5640572  |
| N  | 2.4646591  | 1.1183556  | 0.3730382  |
| C  | 1.3526061  | 1.6858326  | -0.2015508 |
| C  | 0.1500111  | 0.8028076  | 0.0827972  |
| O  | 1.2613351  | 2.7646766  | -0.7572208 |
| N  | -0.5409419 | 1.3244596  | 1.2582382  |
| C  | -0.8246749 | 0.3782456  | 2.2024522  |
| C  | -0.1626189 | -0.8951024 | 1.7281712  |
| O  | -1.5223699 | 0.5283736  | 3.1899542  |
| C  | -0.2098739 | -2.1203514 | 2.3437642  |
| C  | -0.8094949 | -2.4271244 | 3.6752582  |
| Au | -2.1040379 | -1.8787274 | 0.8359822  |
| C  | -3.5907719 | 2.7433086  | -1.7628838 |
| C  | -4.8040579 | 2.3358416  | -1.1955258 |
| C  | -4.8617299 | 2.0200116  | 0.1649892  |
| C  | -3.7044149 | 2.1015106  | 0.9394922  |
| C  | -2.4941609 | 2.5155066  | 0.3856162  |
| C  | -2.4533319 | 2.8363646  | -0.9769968 |
| C  | -1.2528619 | 2.6013526  | 1.2301902  |
| O  | -5.8531179 | 2.2582106  | -2.0446918 |
| C  | -7.1143149 | 1.9280386  | -1.5117378 |
| C  | 3.6014831  | 2.0018566  | 0.8125662  |

|   |            |            |            |
|---|------------|------------|------------|
| C | 4.6936071  | 1.1701886  | 1.4767392  |
| C | 3.0473201  | 3.0113756  | 1.8165742  |
| C | 4.2064331  | 2.6988356  | -0.4015708 |
| H | 0.1676891  | -3.5265984 | -3.0968608 |
| H | 2.4933671  | -4.2911544 | -2.7555568 |
| H | 3.9245911  | -3.2835174 | -0.9906158 |
| H | -0.7799779 | -1.7365144 | -1.6457698 |
| H | 2.1733061  | 0.0460696  | 2.1662202  |
| H | -0.5262879 | 0.7367656  | -0.7846428 |
| H | -1.3789199 | -3.3626454 | 3.6493212  |
| H | -1.4335659 | -1.6104734 | 4.0430292  |
| H | 0.0097151  | -2.5875554 | 4.3892112  |
| H | -3.5767939 | 2.9981956  | -2.8194988 |
| H | -5.8033579 | 1.7498576  | 0.6364262  |
| H | -3.7493659 | 1.8632376  | 2.0020562  |
| H | -1.5131249 | 3.1742846  | -1.4144058 |
| H | -0.5650469 | 3.3626676  | 0.8448372  |
| H | -1.4954469 | 2.8403766  | 2.2705572  |
| H | -7.8199999 | 1.9514386  | -2.3436208 |
| H | -7.4347209 | 2.6497166  | -0.7483868 |
| H | -7.1147739 | 0.9191466  | -1.0690368 |
| H | 5.1639321  | 0.4773376  | 0.7697772  |
| H | 4.3448541  | 0.6197946  | 2.3592842  |
| H | 5.4776891  | 1.8528976  | 1.8210362  |
| H | 2.2953161  | 3.6574856  | 1.3519422  |
| H | 2.5924921  | 2.5025956  | 2.6778732  |
| H | 3.8539581  | 3.6503106  | 2.1935752  |

|   |            |            |            |
|---|------------|------------|------------|
| H | 3.4837301  | 3.3477416  | -0.8986648 |
| H | 4.5743471  | 1.9556726  | -1.1187138 |
| H | 5.0600791  | 3.3046626  | -0.0748668 |
| P | -4.0309109 | -2.0584194 | -0.4858168 |
| C | -4.2916659 | -3.7185334 | -1.1841228 |
| H | -5.1616839 | -3.7141164 | -1.8509838 |
| H | -3.4031919 | -4.0182544 | -1.7497268 |
| H | -4.4550669 | -4.4438054 | -0.3815668 |
| C | -5.5684639 | -1.6193414 | 0.3774402  |
| H | -5.4898039 | -0.5825544 | 0.7218272  |
| H | -6.4212259 | -1.7168254 | -0.3052528 |
| H | -5.7172409 | -2.2723274 | 1.2422202  |
| C | -3.9124509 | -0.9366194 | -1.9138388 |
| H | -3.1595909 | -1.3143754 | -2.6137658 |
| H | -4.8781949 | -0.8699744 | -2.4305348 |
| H | -3.6168849 | 0.0648666  | -1.5794368 |
| H | 3.9562191  | -1.2364564 | 0.7744412  |
| H | 0.3772591  | -2.9112034 | 1.8645682  |
| C | 5.4948821  | -0.7363464 | -1.6011158 |
| C | 6.6175171  | -0.0444994 | -1.9166798 |
| C | 7.6148611  | -0.4449324 | -0.9731628 |
| C | 7.0238611  | -1.3510324 | -0.1568448 |
| O | 5.7240341  | -1.5427994 | -0.5238308 |
| H | 4.4957661  | -0.7821624 | -2.0159388 |
| H | 6.7287501  | 0.6628166  | -2.7273008 |
| H | 8.6399241  | -0.1051824 | -0.9198338 |
| H | 7.3658881  | -1.9333254 | 0.6862672  |
